# Supplementary material for: The skeletal muscle circadian clock regulates titin splicing through RBM20
Source: eLife journal article supplement (doi:10.7554/elife.76478), 2022-09-01

Figure 6 - Source Data 1

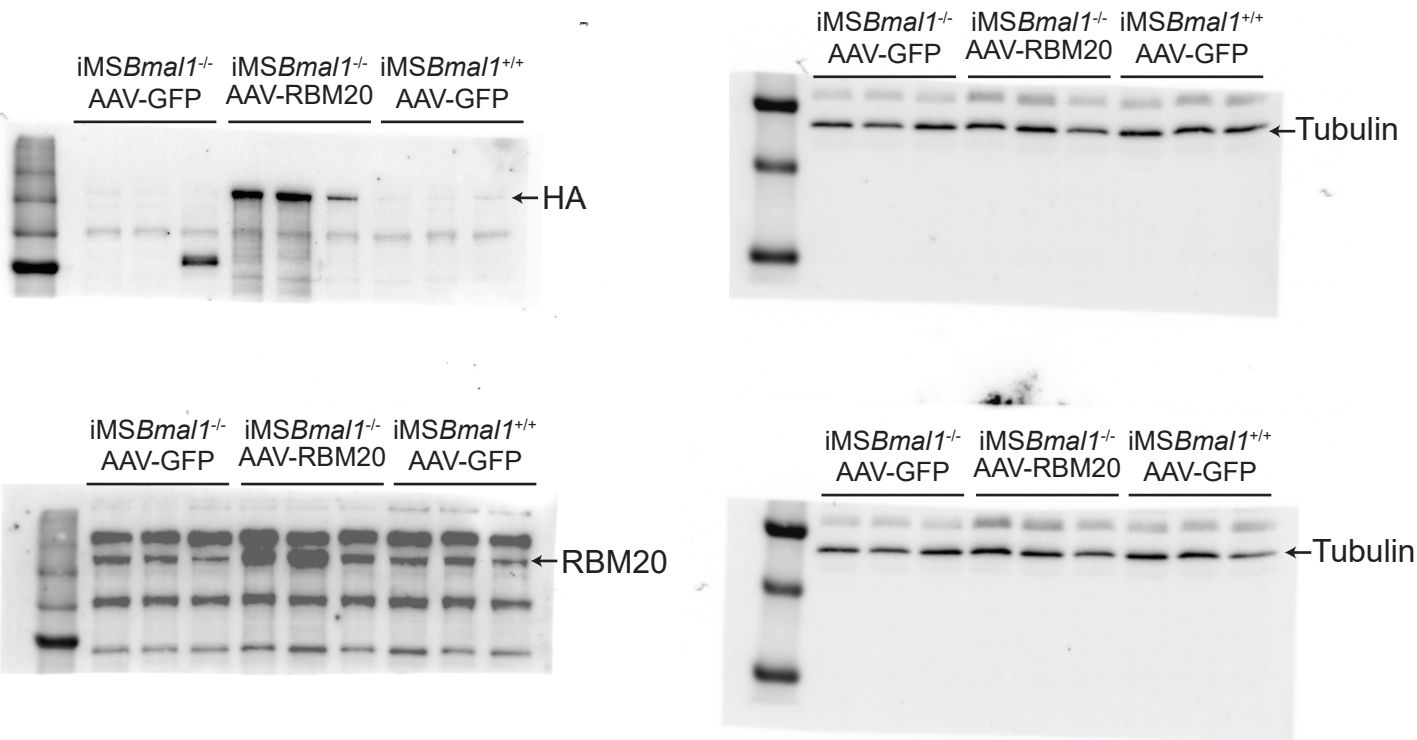

- 1, 447 L TAM Bmal1 HA
- 2, heart
- 3, 243 R VEH
- 4, 441 R TAM GFP
- 5, 262 L TAM Rbm20 HA
- 6, 238 R VEH
- 7, 443 R TAM GFP
- 8, 637 L TAM Rbm20 HA
- 9, 243 L VEH
- 10, 262 R TAM GFP
- 11, 639 L TAM Rbm20 HA
- 12, 259 L VEH
- 13, 249R TAM GFP
- 14, 249 L TAM Rbm20 HA
- 15, 441 L TAM Bmal1 HA

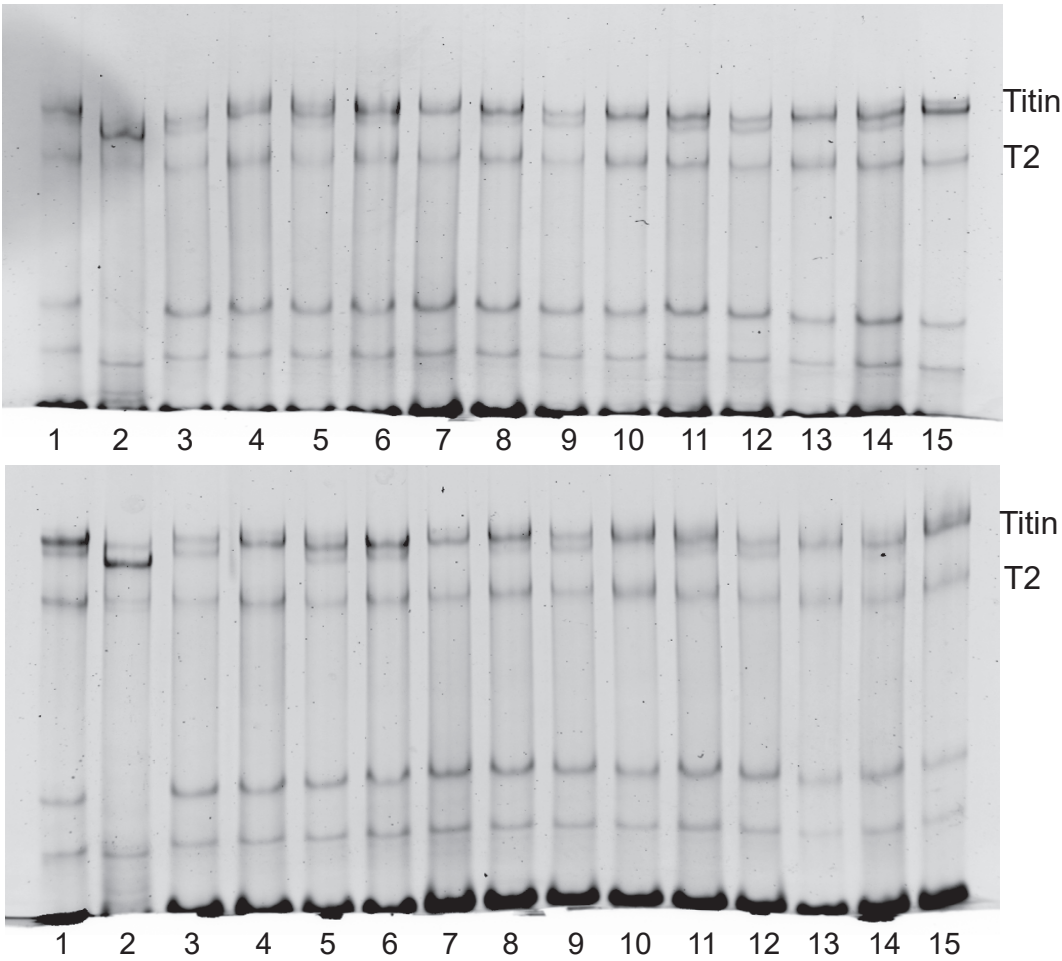

Supplement: supp [file elife-76478-supp-v1.zip]
