# Supplementary material for: The skeletal muscle circadian clock regulates titin splicing through RBM20
Source: eLife journal article supplement (doi:10.7554/elife.76478), 2022-09-01

Figure 1-Source Data 1

1. Global *Bmal1* KO LV
2. TA iMS*Bmal1*<sup>+/+</sup> - M47
3. TA iMS*Bmal1*<sup>+/+</sup> - M90
4. TA iMS*Bmal1*<sup>+/+</sup> - M111
5. TA iMS*Bmal1*<sup>+/+</sup> - M114
6. TA iMS*Bmal1*<sup>-/-</sup> - M61
7. TA iMS*Bmal1*<sup>-/-</sup> - M62
8. TA iMS*Bmal1*<sup>-/-</sup> - M76
9. TA iMS*Bmal1*<sup>-/-</sup> - M77
- 10 - 13. Not relevant to this project.
14. WT LV
15. WT LV

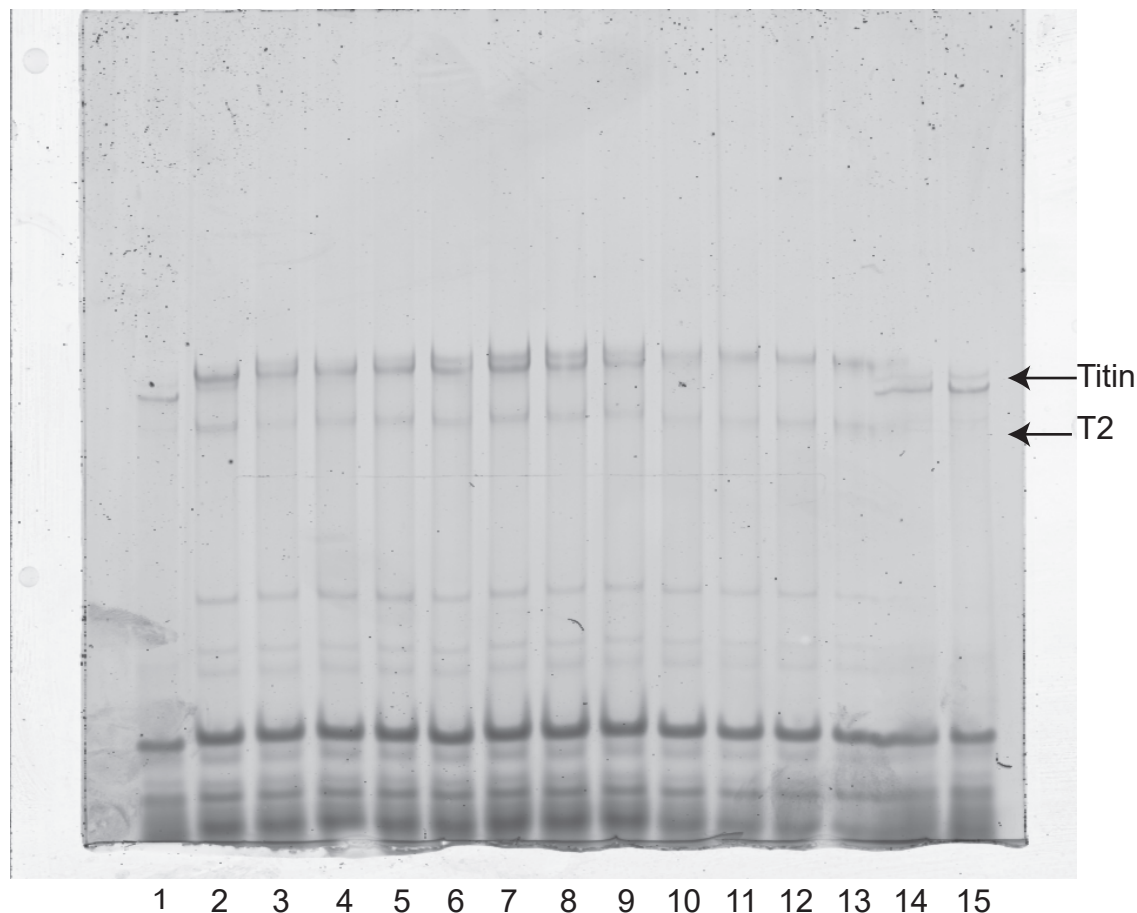

1. WT GTN
2. WT TA
3. WT GTN
4. WT LV
5. WT TA
6. EDL iMS*Bmal1*<sup>+/+</sup> - M1
7. EDL iMS*Bmal1*<sup>-/-</sup> - M7
8. TA iMS*Bmal1*<sup>-/-</sup> - M1
9. TA iMS*Bmal1*<sup>-/-</sup> - M7
- 10 - 13. Not relevant to this project.
14. WT LV
15. WT TA

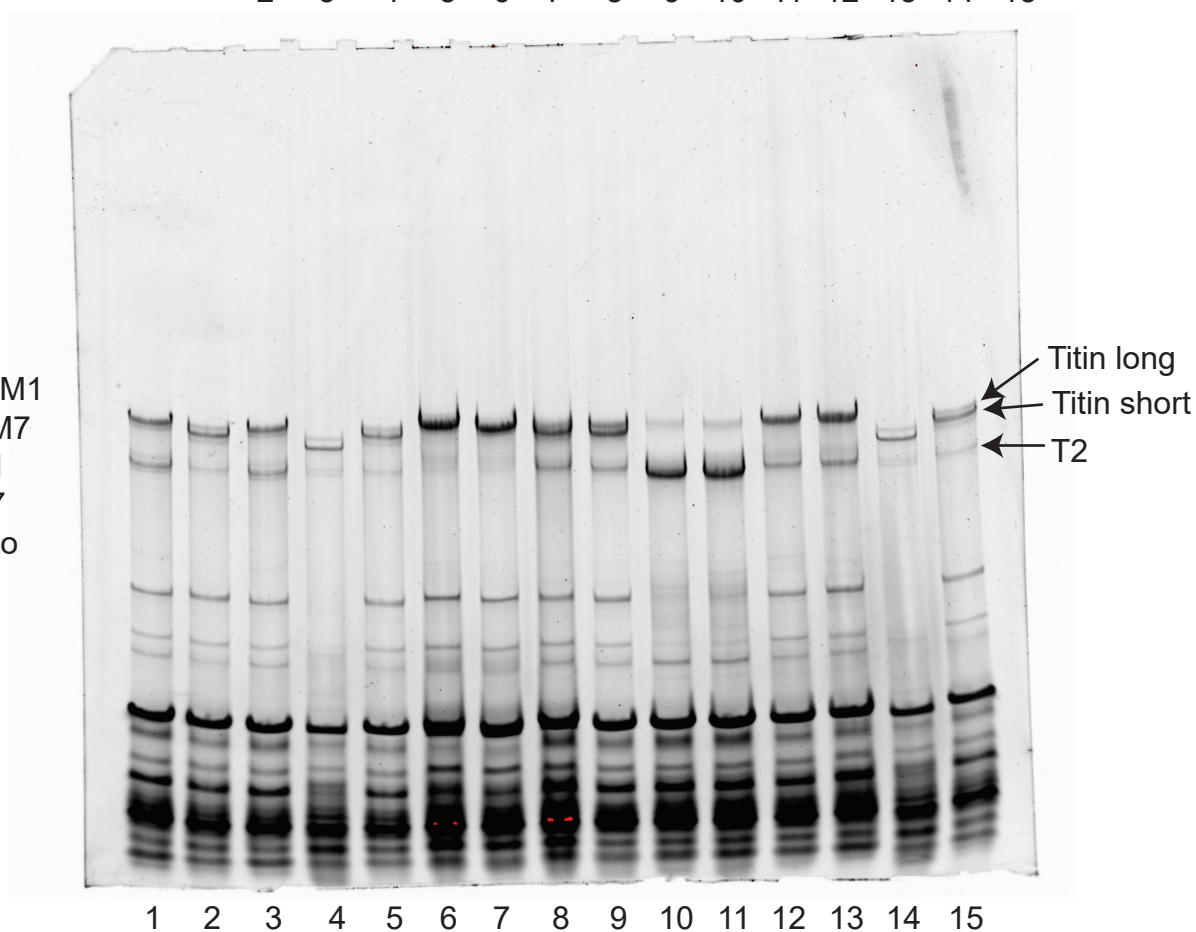

Supplement: supp [file elife-76478-supp-v1.zip]
