# Supplementary material for: The skeletal muscle circadian clock regulates titin splicing through RBM20
Source: eLife journal article supplement (doi:10.7554/elife.76478), 2022-09-01
Supplement: supp [file Figure 1-source data 2.xlsx]

## Sheet: Sheet1
																			Norm Values (Exon 226-Cterm Raw AVG)
																			9.65227e+07	114658612	89095110	7.29739e+07	45517248	5.45236e+07		89561824	9.19807e+07	7.32291e+07	6.24913e+07	100902316			8.10345e+07	89561824
Annotated.Sequence	Modifications	Master.Protein.Accessions	PepStart	PepEnd	Exon (NCBI)	F23_KO_050_TA	F24_KO_051_TA	F25_KO_052_TA	F26_KO_463_TA	F27_KO_464_TA	F28_KO_465_TA	avg_ko	F34_Control_344_TA	F35_Control_345_TA	F36_Control_346_TA	F37_Control_554_TA	F38_Control_556_TA	avg_control	F23_KO_050_TA_norm	F24_KO_051_TA_norm	F25_KO_052_TA_norm	F26_KO_463_TA_norm	F27_KO_464_TA_norm	F28_KO_465_TA_norm	avg_ko_norm	F34_Control_344_TA_norm	F35_Control_345_TA_norm	F36_Control_346_TA_norm	F37_Control_554_TA_norm	F38_Control_556_TA_norm	avg_control_norm	KO/Control					F23_KO_050_TA	F24_KO_051_TA	F25_KO_052_TA	F26_KO_463_TA	F27_KO_464_TA	F28_KO_465_TA	avg_ko	F34_Control_344_TA	F35_Control_345_TA	F36_Control_346_TA	F37_Control_554_TA	F38_Control_556_TA	avg_control
[K].SIEVPETK.[A]		Ttn-203	2896	2903	37xx	98877476	103753032	95178216	81228716	60748484	59393290	88203466	94200064	99896576	77740766	69040164	99194720	94200064	1.0244	0.904887	1.06828	1.11312	1.33463	1.08931	1.0788	1.05179	1.08606	1.06161	1.1048	0.983077	1.06161	1.01619				1	1.01065e+08	1.03279e+08	9.62541e+07	7.93178e+07	6.05778e+07	59252996	8.77859e+07	9.22234e+07	9.90894e+07	7.52701e+07	6.73872e+07	9.79197e+07	9.22234e+07
[K].SIEVPETK.[A]		Ttn-203	2896	2903	37xx	98877476	103753032	95178216	81228716	60748484	59393290	88203466	94200064	99896576	77740766	69040164	99194720	94200064	1.0244	0.904887	1.06828	1.11312	1.33463	1.08931	1.0788	1.05179	1.08606	1.06161	1.1048	0.983077	1.06161	1.01619				2	62932894	5.30261e+07	54097156	4.60553e+07	34172456	35644810	4.95407e+07	43788606	53525182	38163758	35558879	5.04467e+07	43788606
[K].ITIPTFKPER.[I]		Ttn-203	2065	2074	28xx	105438978	102331088	98405788	75496014	60236533	58972408	86950901	88270194	97474942	70328892	64081289	95369776	88270194	1.09237	0.892485	1.1045	1.03456	1.32338	1.08159	1.08698	0.985578	1.05973	0.960395	1.02544	0.945169	0.985578	1.10289				3	66998008	63555541	6.13839e+07	5.1227e+07	3.77262e+07	3.74474e+07	5.63055e+07	47079284	6.12464e+07	4.21797e+07	4.20203e+07	56495956	47079284
[K].EIAAPELEPLHLR.[Y]		Ttn-203; A0A0A0MTS7	1677	1689	28xx	95361454	98346422	85909330	68792098	50649417	52364274	77350714	82332330	84331142	60989485	54452853	81150922	81150922	0.987969	0.857733	0.964243	0.942695	1.11275	0.960397	0.96232	0.919279	0.916835	0.832858	0.871367	0.804252	0.871367	1.10438				4	8.14629e+07	5.65974e+07	77705130	4.81791e+07	3.61066e+07	3.5591e+07	5.23883e+07	5.84292e+07	7.489e+07	3.93503e+07	3.89082e+07	68165537	5.84292e+07
[R].VPAPAEVPVTPPTLVSGLK.[N]		Ttn-203	935	953	17xx	93208659	94257982	78494615	61884787	4.96971e+07	48085041	70189701	77087720	80206245	56618133	5.48157e+07	76225364	76225364	0.965666	0.822075	0.88102	0.848041	1.09183	0.881913	0.881467	0.860721	0.87199	0.773164	0.877173	0.755437	0.860721	1.0241				5	6.91643e+07	6.6658e+07	6.43396e+07	5.16636e+07	3.84638e+07	3.88061e+07	5.80016e+07	5.85931e+07	62502788	4.68804e+07	4.31985e+07	6.1745e+07	5.85931e+07
[R].VPAPAEVPVTPPTLVSGLK.[N]		Ttn-203	935	953	18xx	93208659	94257982	78494615	61884787	4.96971e+07	48085041	70189701	77087720	80206245	56618133	5.48157e+07	76225364	76225364	0.965666	0.822075	0.88102	0.848041	1.09183	0.881913	0.881467	0.860721	0.87199	0.773164	0.877173	0.755437	0.860721	1.0241				6	6.6963e+07	6.95562e+07	60439324	51248840	3.76528e+07	3.80108e+07	55844082	6.0923e+07	6.20479e+07	4.54658e+07	4.27259e+07	6.0757e+07	6.0757e+07
[R].LYKPVFVLKPASFK.[C]		Ttn-203	1460	1473	25xx	74712960	95588461	55637424	5.57479e+07	53845013	48046950	5.56927e+07	74868953	78747513	61184548	57133961	77471384	74868953	0.774045	0.833679	0.624472	0.763944	1.18296	0.881214	0.803862	0.835947	0.85613	0.835522	0.91427	0.767786	0.835947	0.961618				7	6.50106e+07	55258612	60930169	3.96702e+07	3.14483e+07	3.1794e+07	4.74644e+07	45732580	4.26745e+07	3.6758e+07	3.19004e+07	4.68376e+07	4.26745e+07
[R].LLIPSTR.[M]		Ttn-203; A0A0A0MTS7	3120	3126	40xx	78480512	76548456	72182432	58643464	47232536	45132544	65412948	69065704	73560624	55740084	51056780	74556072	69065704	0.813078	0.667621	0.810173	0.803623	1.03768	0.827762	0.811625	0.771151	0.799739	0.761174	0.817022	0.738894	0.771151	1.05249				8	78113108	89264354	6.71587e+07	6.27205e+07	4.93605e+07	4.71558e+07	6.49396e+07	7.06852e+07	7.76247e+07	6.03439e+07	5.75154e+07	7.62916e+07	7.06852e+07
[R].LEAPESILHER.[I]		Ttn-202	NA	NA	44xx	267708288	73413704	62953592	51220048	38719712	197041224	68183648	62906260	63582532	48754888	42531992	61648184	62277222	2.77353	0.640281	0.706589	0.701896	0.85066	3.61387	0.778624	0.702378	0.691259	0.665785	0.680606	0.610969	0.680606	1.14402				9	7.76144e+07	1.07793e+08	7.19831e+07	82730692	63571432	6.11554e+07	7.47988e+07	92022414	1.04057e+08	7.66677e+07	7.37886e+07	9.94226e+07	92022414
[R].LEAPESILHER.[I]		Ttn-202	NA	NA	47xx	267708288	73413704	62953592	51220048	38719712	197041224	68183648	62906260	63582532	48754888	42531992	61648184	62277222	2.77353	0.640281	0.706589	0.701896	0.85066	3.61387	0.778624	0.702378	0.691259	0.665785	0.680606	0.610969	0.680606	1.14402				10	1.25962e+08	1.55105e+08	1.26969e+08	129653322	106263930	1.01972e+08	1.26466e+08	1.43874e+08	166555305	1.23104e+08	1.2319e+08	1.69112e+08	1.43874e+08
[K].SGVPLTTGYR.[Y]		Ttn-203; A0A0A0MTS7	1120	1129	20xx	55457208	67569408	61133136	51352532	43010332	44590612	53404870	61647260	66379700	50047148	50616880	92704240	61647260	0.574551	0.589309	0.686156	0.703711	0.944924	0.817823	0.694934	0.688321	0.72167	0.683432	0.809982	0.918752	0.72167	0.962953
[K].VSVPDVTSVK.[W]		Ttn-203; A0A0A0MTS7	2474	2483	32xx	69259096	66946636	65118108	50225924	38612676	38806080	57672016	58880220	62538512	47322388	42236360	64959384	58880220	0.717542	0.583878	0.730883	0.688273	0.848309	0.71173	0.714636	0.657425	0.679909	0.646223	0.675876	0.643785	0.657425	1.08702
[R].ATGNPNPDIVWLK.[N]		Ttn-203; A0A0A0MTS7	1585	1597	27xx	66749412	69090840	58766536	50204404	39353700	38773840	54485470	56888076	62081680	46643228	44383880	60141144	56888076	0.691541	0.602579	0.659593	0.687978	0.864589	0.711139	0.689759	0.635182	0.674942	0.636949	0.710241	0.596033	0.636949	1.08291					F23_KO_050_TA	F24_KO_051_TA	F25_KO_052_TA	F26_KO_463_TA	F27_KO_464_TA	F28_KO_465_TA	avg_ko	F34_Control_344_TA	F35_Control_345_TA	F36_Control_346_TA	F37_Control_554_TA	F38_Control_556_TA	avg_control
[K].QKPDIVLFPEPVR.[V]		Ttn-203	1845	1857	28xx	65207384	65881914	57765100	47918274	36133599	35829605	52841687	54592398	58351914	43225162	39000637	56643231	54592398	0.675565	0.574592	0.648353	0.65665	0.793844	0.65714	0.656895	0.60955	0.634393	0.590273	0.624097	0.561367	0.60955	1.07767				1	0.802341	0.665864	0.75809	0.611768	0.57007	0.581073	0.638816	0.641	0.594934	0.611435	0.547018	0.579023	0.594934
[R].SSNYVSSLEILR.[T]		Ttn-203	4519	4530	50xx	59242648	62057128	50456572	45159504	36953548	37178276	47808038	50938972	54916300	42579280	37851880	52826680	50938972	0.613769	0.541234	0.566323	0.618845	0.811858	0.681875	0.616307	0.568758	0.597041	0.581453	0.605714	0.523543	0.581453	1.05994				2	0.499617	0.341872	0.426065	0.355218	0.321581	0.349556	0.352387	0.304353	0.321366	0.310012	0.288651	0.298303	0.304353
[K].TTLEELLEEDGEEK.[M]		Ttn-203; A0A0A0MTS7	1267	1280	23xx	NA	69797616	NA	47930020	31787212	38798488	43364254	59970172	50487920	35814948	33632512	47726772	47726772		0.608743		0.656811	0.698355	0.711591	0.677583	0.669595	0.548897	0.489081	0.538195	0.473	0.538195	1.25899				3	0.53189	0.409757	0.483455	0.395108	0.355024	0.367233	0.402432	0.327225	0.367724	0.342634	0.341102	0.334074	0.341102
[R].RPASEPHVVPQAVKPAVIQAPSETHIK.[T]		Ttn-203	753	779	14xx	69268444	66689699	53823125	3.80626e+07	2.6463e+07	2.67197e+07	4.59428e+07	49438916	46862938	2.96428e+07	2.72934e+07	5.00824e+07	46862938	0.717639	0.581637	0.604109	0.521592	0.581384	0.490058	0.58151	0.552009	0.509486	0.404796	0.436755	0.496345	0.496345	1.17159				4	0.646725	0.364897	0.612	0.371599	0.339782	0.349029	0.368248	0.406113	0.44964	0.319651	0.315839	0.403079	0.403079
[R].EEHFEVLR.[G]		Ttn-203	916	923	16xx	65524186	6.41009e+07	54900072	4.73225e+07	33577430	39448812	5.11113e+07	57919406	5.13976e+07	3.5427e+07	38590554	46822624	46822624	0.678847	0.559059	0.616196	0.648485	0.737686	0.723518	0.663666	0.646697	0.558787	0.483783	0.617535	0.464039	0.558787	1.18769				5	0.549087	0.429759	0.506733	0.398475	0.361965	0.380558	0.414117	0.407252	0.375267	0.380819	0.350665	0.365113	0.375267
[R].FGPAHFECR.[L]	1xCarbamidomethyl [C8]	Ttn-203; A0A0A0MTS7	1723	1731	28xx	55695756	58430220	45963418	37879880	28668502	28880101	41921649	49547066	46002498	33423114	30227315	45629138	45629138	0.577022	0.509602	0.515892	0.519088	0.629838	0.529681	0.524385	0.553216	0.500132	0.456418	0.483704	0.452211	0.483704	1.0841				6	0.531612	0.448445	0.476015	0.395276	0.354333	0.372759	0.42186	0.423446	0.372536	0.369328	0.346829	0.359271	0.369328
[K].VCEGDIVQLEVK.[V]	1xCarbamidomethyl [C2]	Ttn-203; A0A0A0MTS7	2373	2384	31xx	46841536	55039944	43151964	40294892	33488314	34077884	41723428	44709936	51893444	40063016	33371126	47970660	44709936	0.48529	0.480033	0.484336	0.552183	0.735728	0.625012	0.518736	0.499208	0.564177	0.547091	0.534012	0.475417	0.534012	0.971395				7	0.516112	0.356265	0.479881	0.305971	0.295945	0.311792	0.334029	0.317865	0.256218	0.298593	0.258953	0.276962	0.276962
[R].IPVVLPEDEGIYTAFASNIK.[G]		Ttn-203; A0A0A0MTS7	1353	1372	24xx	60828984	67441470	37454181	41973634	30548633	30304639	3.97139e+07	47720200	54845056	37321343	33873645	44335766	44335766	0.630204	0.588194	0.420384	0.575187	0.671144	0.555808	0.58169	0.532819	0.596267	0.509652	0.542054	0.439393	0.532819	1.09172				8	0.620131	0.575508	0.528937	0.483755	0.464509	0.462441	0.506346	0.491298	0.46606	0.490186	0.466884	0.45113	0.466884
[K].TIVSTAQISETR.[Q]		Ttn-203	206	217	5xx	54342512	47365940	48546732	39582052	32143580	34370044	43473996	45987584	43880772	33593536	30454098	46600876	43880772	0.563002	0.413104	0.544887	0.542414	0.706185	0.63037	0.553944	0.513473	0.477065	0.458745	0.487333	0.461841	0.477065	1.16115				9	0.616172	0.694963	0.566933	0.638092	0.598241	0.599729	0.607951	0.639602	0.624762	0.622787	0.598982	0.58791	0.622787
[K].DGQELQIADR.[I]		Ttn-203	3099	3108	39xx	49307292	44756360	50688792	41082260	29586340	31178584	42919310	44281288	43948432	35502392	31871176	43823972	43823972	0.510836	0.390345	0.568929	0.562972	0.650003	0.571837	0.565951	0.494421	0.4778	0.484812	0.51001	0.434321	0.484812	1.16736				10	1	1	1	1	1	1	1	1	1	1	1	1	1
[K].FTCEIQGAPNVR.[F]	1xCarbamidomethyl [C3]	Ttn-203	4488	4499	50xx	53469664	56486908	46245412	39798064	30869150	31783412	43021738	43598456	45602692	34697036	32086226	46639380	43598456	0.553959	0.492653	0.519057	0.545374	0.678186	0.58293	0.549667	0.486797	0.495785	0.473815	0.513451	0.462223	0.486797	1.12915
[K].VTAENPEGVTEHK.[V]		Ttn-203	1918	1930	28xx	50414327	54856316	43527234	35750442	27010519	26299875	39638838	44547968	43129143	2.96288e+07	28202655	43387156	43129143	0.522305	0.478432	0.488548	0.489908	0.593413	0.482358	0.489228	0.497399	0.468893	0.404604	0.451305	0.429992	0.451305	1.08403
[R].VETSCNLSVEK.[I]	1xCarbamidomethyl [C5]	Ttn-203	2528	2538	32xx	38939304	43913696	43443972	37363340	30269640	26365122	38151322	43595356	40266088	43578784	31237738	41120632	41120632	0.403421	0.382995	0.487613	0.51201	0.665015	0.483555	0.485584	0.486763	0.437767	0.595102	0.499873	0.407529	0.486763	0.997578
[R].VVGKPDPECEWYK.[N]	1xCarbamidomethyl [C9]	Ttn-203; A0A0A0MTS7	2107	2119	28xx	53753551	49046721	45104241	34384021	2.69364e+07	2.69013e+07	39744131	4.06749e+07	46285227	3.43276e+07	30966821	43382102	4.06749e+07	0.556901	0.427763	0.506248	0.471183	0.591784	0.493388	0.499818	0.454154	0.503206	0.468769	0.495538	0.429942	0.468769	1.06623
[R].FQCQVSGTDLK.[V]	1xCarbamidomethyl [C3]	Ttn-203	3370	3380	43xx	50038952	48114652	45950744	36375368	28678212	27936292	41163056	40639008	44477884	32324068	31045028	44178192	40639008	0.518416	0.419634	0.515749	0.498471	0.630052	0.512371	0.51406	0.453754	0.483556	0.44141	0.496789	0.437831	0.453754	1.13291
[R].FQCQVSGTDLK.[V]	1xCarbamidomethyl [C3]	Ttn-203	3370	3380	44xx	50038952	48114652	45950744	36375368	28678212	27936292	41163056	40639008	44477884	32324068	31045028	44178192	40639008	0.518416	0.419634	0.515749	0.498471	0.630052	0.512371	0.51406	0.453754	0.483556	0.44141	0.496789	0.437831	0.453754	1.13291
[R].VLEGETAR.[F]		Ttn-203; A0A0A0MTS7	1858	1865	28xx	29702302	42849332	759423	36077972	25439174	29911354	29806828	41734436	39963232	29551548	29582806	41383296	39963232	0.307723	0.373712	0.00852374	0.494396	0.558891	0.548595	0.434054	0.465985	0.434474	0.403549	0.473391	0.410132	0.434474	0.999034
[R].FCAVISGRPQPK.[I]	1xCarbamidomethyl [C2]	Ttn-203; A0A0A0MTS7	3264	3275	42xx	43907196	45007316	40370500	30254330	2.42998e+07	2.36503e+07	35312415	38516713	38991189	30495852	27175998	40873044	38516713	0.45489	0.392533	0.453117	0.414591	0.533859	0.433763	0.44344	0.430057	0.423906	0.416444	0.434876	0.405075	0.423906	1.04608
[R].IQSQTVGQGSDAHFR.[V]		Ttn-203; A0A0A0MTS7	2090	2104	28xx	58136214	57031656	52157646	42895398	3.17319e+07	32177258	47526522	53811017	37674012	38351092	3.27614e+07	49399778	38351092	0.602306	0.497404	0.585415	0.587819	0.69714	0.590153	0.588986	0.600825	0.409586	0.523714	0.524256	0.48958	0.523714	1.12463
[R].NVHFGDAADYTFVAGK.[A]		Ttn-203; A0A0A0MTS7	3035	3050	38xx	48562198	51778484	34618607	32421675	24045763	23555563	33520141	37430568	39607102	26207943	25824196	37449899	37430568	0.503117	0.451588	0.388558	0.444292	0.528278	0.432025	0.44794	0.41793	0.430602	0.35789	0.413244	0.37115	0.413244	1.08396
[K].DVNVIEGTK.[A]		Ttn-203; A0A0A0MTS7	2459	2467	32xx	40241940	41878903	38111317	36191298	26425829	2.7721e+07	3.71513e+07	3.73432e+07	4.03322e+07	3.15834e+07	29586387	37516818	3.73432e+07	0.416917	0.365249	0.42776	0.495949	0.580567	0.508423	0.461854	0.416954	0.438485	0.431296	0.473448	0.371813	0.431296	1.07085
[K].NVEIKPSDK.[H]		Ttn-203	2837	2845	36xx	43237648	41139210	38035276	32077544	25091833	25320960	35056410	37168455	36536346	29841637	26137786	38265356	36536346	0.447953	0.358797	0.426906	0.439576	0.55126	0.464404	0.443764	0.415003	0.397217	0.40751	0.418263	0.379232	0.40751	1.08896
[K].VVISATK.[A]		Ttn-203	524	530	10xx	52898524	45193974	48206182	34809713	28334665	29500874	4.00018e+07	39790856	36137039	30498910	27862149	41827927	36137039	0.548042	0.394161	0.541064	0.477016	0.622504	0.541066	0.541065	0.444284	0.392876	0.416486	0.445856	0.414539	0.416486	1.29912
[R].VREPAISAVEQTAQR.[T]		Ttn-203	437	451	8xx	46641668	36476560	47801872	31048446	23604630	26333308	33762503	39604840	35755828	27767498	24854386	38182388	35755828	0.48322	0.318132	0.536526	0.425474	0.518586	0.482971	0.483095	0.442207	0.388732	0.379186	0.397725	0.378409	0.388732	1.24275
[R].TTTTAVHIQPAQEQAR.[K]		Ttn-203	452	467	8xx	60575454	43625073	52707177	37924140	26315218	3.00438e+07	4.07746e+07	42679608	35433303	2.5266e+07	23625058	39354544	35433303	0.627577	0.380478	0.591583	0.519695	0.578137	0.551024	0.56458	0.476538	0.385225	0.345026	0.378053	0.390026	0.385225	1.46559
[R].TTTTAVHIQPAQEQAR.[K]		Ttn-203	452	467	9xx	60575454	43625073	52707177	37924140	26315218	3.00438e+07	4.07746e+07	42679608	35433303	2.5266e+07	23625058	39354544	35433303	0.627577	0.380478	0.591583	0.519695	0.578137	0.551024	0.56458	0.476538	0.385225	0.345026	0.378053	0.390026	0.385225	1.46559
[K].APTVKPGETR.[V]		Ttn-203	862	871	16xx	4.06423e+07	38899116	37991713	26843446	20432685	2.18649e+07	3.24176e+07	35315103	35404342	2.5824e+07	24378954	35622000	35315103	0.421065	0.33926	0.426417	0.36785	0.4489	0.401017	0.411041	0.39431	0.38491	0.352647	0.390117	0.353035	0.38491	1.06789
[R].DSGVITCR.[A]	1xCarbamidomethyl [C7]	Ttn-203	1777	1784	28xx	51106384	37130208	51231264	36237112	24089066	29036320	36683660	41920900	35057176	2.83702e+07	24629066	36881104	35057176	0.529475	0.323833	0.575018	0.496577	0.529229	0.532546	0.529352	0.468067	0.381136	0.387416	0.39412	0.365513	0.387416	1.36637
[R].HSDAGEYTFVAGR.[N]		Ttn-203	3218	3230	41xx	45145908	46406572	35492862	32414239	24805692	24325001	3.39536e+07	38565942	37559358	28225565	24839812	34738664	34738664	0.467723	0.404737	0.39837	0.44419	0.544973	0.446137	0.445164	0.430607	0.408339	0.385442	0.397492	0.34428	0.397492	1.11993
[K].ELQDIEVPESYSGELECIISPENIEGK.[W]	1xCarbamidomethyl [C17]	Ttn-203	2278	2304	30xx	38023319	42582237	35473856	30930730	22839644	22390722	33202293	34129767	38264784	27931278	25149392	37735354	34129767	0.393931	0.371383	0.398157	0.42386	0.50178	0.410661	0.404409	0.381075	0.416009	0.381423	0.402446	0.373979	0.381423	1.06026
[K].WYLNDEQIKPDDR.[V]		Ttn-203; A0A0A0MTS7	2484	2496	32xx	37148428	41729472	32675876	30563460	22899196	22117918	31619668	33674716	38457796	31333914	26928676	37015564	33674716	0.384867	0.363945	0.366753	0.418828	0.503088	0.405658	0.395263	0.375994	0.418107	0.427889	0.430919	0.366846	0.418107	0.945362
[R].RIEPLEVALGHLAK.[F]		Ttn-203	4474	4487	50xx	3.89519e+07	43721377	2.79424e+07	2.69601e+07	20764896	19446806	2.74512e+07	33514646	33079033	2.48594e+07	20603449	32210235	32210235	0.403551	0.381318	0.313624	0.369449	0.456198	0.356668	0.375383	0.374207	0.35963	0.339475	0.329701	0.319222	0.339475	1.10578
[R].YGQEQWEEGDLYDKEK.[Q]		Ttn-203; A0A0A0MTS7	1690	1705	28xx	42755094	39846882	3.54242e+07	2.63465e+07	1.93269e+07	19203536	30885369	3.19672e+07	3.36212e+07	2.34572e+07	21248325	3.19263e+07	3.19263e+07	0.442954	0.347526	0.3976	0.36104	0.424605	0.352206	0.37932	0.356928	0.365524	0.320327	0.34002	0.316408	0.34002	1.11558
[K].HLALSNNFR.[G]		Ttn-203	2664	2672	34xx	39829243	41383909	29860118	2.95023e+07	22517846	2.23014e+07	2.96812e+07	34425078	3.09483e+07	2.5525e+07	2.22547e+07	31927864	3.09483e+07	0.412641	0.360932	0.335149	0.404286	0.49471	0.409023	0.406655	0.384372	0.336465	0.348564	0.356124	0.316424	0.348564	1.16666
[KR].IEPLEVALGHLAK.[F]		Ttn-203; A0A0A0MTS7	4475	4487	50xx	40919001	45759408	35956586	2.53365e+07	19905746	19479378	3.06466e+07	3.09311e+07	36300044	24298645	22431267	3.40066e+07	3.09311e+07	0.423931	0.399093	0.403575	0.3472	0.437323	0.357265	0.401334	0.34536	0.394648	0.331817	0.35895	0.337025	0.34536	1.16207
[K].SLVEESQLPDGK.[K]		Ttn-203	1805	1816	28xx	41927892	39233712	35111652	27948896	21756842	22668814	31530274	32259744	30764304	23905370	22489642	32509286	30764304	0.434384	0.342179	0.394092	0.382999	0.477991	0.415762	0.404927	0.360195	0.334465	0.326446	0.359884	0.322186	0.334465	1.21067
[K].IDSIISQDSAWYTATAINK.[A]		Ttn-203	1623	1641	28xx	3.28973e+07	38706287	2.41698e+07	2.44701e+07	2.36231e+07	2.20693e+07	2.43199e+07	3.03386e+07	32653343	2.65188e+07	23102272	30780643	3.03386e+07	0.340824	0.337579	0.271281	0.335326	0.518992	0.404766	0.339202	0.338744	0.355002	0.362135	0.369688	0.305054	0.355002	0.955492
[R].TASPHFTVSK.[I]		Ttn-203; A0A0A0MTS7	812	821	15xx	45088586	41404592	41335262	28851764	22749706	22624033	35093513	32526882	29923826	23975688	22002135	34216122	29923826	0.467129	0.361112	0.463945	0.395371	0.499804	0.41494	0.439443	0.363178	0.325327	0.327406	0.352083	0.339101	0.339101	1.2959
[R].DGQVISTSTLPGVQISFSDGR.[A]		Ttn-203; A0A0A0MTS7	42	62	3xx	33332423	42744100	21502651	2.96759e+07	2.68454e+07	2.18682e+07	28260651	2.92727e+07	3.65684e+07	2.73574e+07	23628815	30463774	2.92727e+07	0.345332	0.372795	0.241345	0.406665	0.589785	0.401078	0.386936	0.326843	0.397565	0.373586	0.378113	0.301914	0.373586	1.03573
[K].VNVEVEFAEPEPERK.[L]		Ttn-203; A0A0A0MTS7	1651	1665	28xx	27843682	39368099	22675371	24928220	2.45102e+07	1.77212e+07	2.47192e+07	2.86049e+07	27922013	25426548	2.43397e+07	28994601	27922013	0.288468	0.343351	0.254507	0.341605	0.538482	0.325019	0.333312	0.319387	0.303564	0.347219	0.38949	0.287353	0.319387	1.0436
[R].ITGEITTK.[Q]		Ttn-203	538	545	10xx	31035542	30010878	27547942	22545804	17683988	18200402	25046873	27975808	27261040	21738758	20193850	29413536	27261040	0.321536	0.261741	0.309197	0.308957	0.388512	0.333808	0.315367	0.312363	0.296378	0.296859	0.323146	0.291505	0.296859	1.06234
[K].EEQLLSTGFK.[C]		Ttn-203; A0A0A0MTS7	3281	3290	42xx	29375986	41200116	16037545	29371840	24255684	20892734	26813762	28441886	33326942	25855330	22886056	27205492	27205492	0.304343	0.359329	0.180005	0.402498	0.53289	0.383187	0.371258	0.317567	0.362325	0.353074	0.366228	0.269622	0.353074	1.0515
[K].LFVETLHITK.[T]		Ttn-203; A0A0A0MTS7	2883	2892	36xx	41481683	45551331	2.20115e+07	2.18621e+07	2.45961e+07	22291504	2.34438e+07	31486429	27158289	24862622	2.05076e+07	30403254	27158289	0.429761	0.397278	0.247056	0.299588	0.54037	0.408842	0.40306	0.351561	0.295261	0.339518	0.328168	0.301314	0.328168	1.22821
[K].LFVETLHITK.[T]		Ttn-203; A0A0A0MTS7	2883	2892	37xx	41481683	45551331	2.20115e+07	2.18621e+07	2.45961e+07	22291504	2.34438e+07	31486429	27158289	24862622	2.05076e+07	30403254	27158289	0.429761	0.397278	0.247056	0.299588	0.54037	0.408842	0.40306	0.351561	0.295261	0.339518	0.328168	0.301314	0.328168	1.22821
[K].VVVAADK.[A]		Ttn-203; A0A0A0MTS7	478	484	9xx	42959359	36719942	40488608	2.65019e+07	20914662	2.22133e+07	3.16109e+07	2.96299e+07	26858184	21820519	20152342	32493467	26858184	0.44507	0.320255	0.454443	0.36317	0.459489	0.407407	0.426239	0.330831	0.291998	0.297976	0.322482	0.322029	0.322029	1.3236
[K].QLITFTQELQDVVAK.[E]		Ttn-203; A0A0A0MTS7	2178	2192	29xx	32811918	40716036	20560808	25950016	21285166	19808078	23617591	26671196	30436544	23277836	20472034	26522690	26522690	0.33994	0.355107	0.230774	0.355607	0.467629	0.363294	0.355357	0.297796	0.330901	0.317877	0.327598	0.262855	0.317877	1.11791
[K].LTHSLNIR.[N]		Ttn-203; A0A0A0MTS7	3027	3034	38xx	29153816	15029636	NA	22623360	16486694	17324814	17324814	27276096	26348728	2.03601e+07	16732904	26688470	26348728	0.302041	0.131082		0.31002	0.362208	0.317749	0.31002	0.30455	0.286459	0.278033	0.267764	0.264498	0.278033	1.11505
[K].VSEESEELR.[S]		Ttn-203	1996	2004	28xx	31837056	28779746	36862752	23355382	17736830	18604510	26067564	26295678	26018064	18171124	17707430	26473548	26018064	0.32984	0.251004	0.413746	0.320051	0.389673	0.34122	0.33553	0.293604	0.282864	0.248141	0.283358	0.262368	0.282864	1.18619
[R].TFVEDQEFHISSFEER.[L]		Ttn-203	1240	1255	22xx	3.33267e+07	41196337	24047205	21761934	23029128	2.21404e+07	2.35382e+07	30661177	2.59535e+07	25059294	21403026	3.04104e+07	2.59535e+07	0.345274	0.359296	0.269905	0.298216	0.505943	0.406071	0.352285	0.342347	0.282163	0.342204	0.342496	0.301385	0.342204	1.02946
[R].TFVEDQEFHISSFEER.[L]		Ttn-203	1240	1255	23xx	3.33267e+07	41196337	24047205	21761934	23029128	2.21404e+07	2.35382e+07	30661177	2.59535e+07	25059294	21403026	3.04104e+07	2.59535e+07	0.345274	0.359296	0.269905	0.298216	0.505943	0.406071	0.352285	0.342347	0.282163	0.342204	0.342496	0.301385	0.342204	1.02946
[K].LDDAGEYTYK.[V]		Ttn-203	2689	2698	34xx	29054284	29345374	26105540	21128548	16324279	16608591	23617044	25252110	25844888	20095942	17381696	25674590	25252110	0.30101	0.255937	0.293008	0.289536	0.358639	0.304613	0.297009	0.281952	0.280982	0.274425	0.278146	0.25445	0.278146	1.06782
[R].HQYVVER.[R]		Ttn-203	3200	3206	41xx	30220910	32172590	26614274	21216394	15891224	16287743	23915334	24723504	24529370	18054476	16264838	26262796	24529370	0.313096	0.280595	0.298718	0.29074	0.349125	0.298728	0.298723	0.27605	0.266679	0.246548	0.260274	0.260279	0.260279	1.1477
[K].TKDELLHWTK.[E]		Ttn-203; A0A0A0MTS7	2040	2049	28xx	33133688	30608521	2.51769e+07	19036944	14568901	14805591	2.21069e+07	24044240	2.47677e+07	15958080	14801127	23719577	23719577	0.343273	0.266954	0.282585	0.260873	0.320074	0.271545	0.277065	0.268465	0.269271	0.21792	0.236851	0.235075	0.236851	1.16979
[K].VGEIAPGFAYSEYEK.[E]		Ttn-203	1204	1218	22xx	31004118	28329156	25969902	21387850	16262357	17292926	23678876	23545114	23921794	18125762	17179106	23789964	23545114	0.321211	0.247074	0.291485	0.293089	0.357279	0.317164	0.305127	0.262892	0.260074	0.247521	0.274904	0.235772	0.260074	1.17323
[K].EVGVSISGSTVR.[E]		Ttn-203	904	915	16xx	30144776	26559766	27677576	21484638	17121228	19339880	24022202	24151622	23244104	19866478	18604998	24280908	23244104	0.312308	0.231642	0.310652	0.294416	0.376148	0.354707	0.31148	0.269664	0.252706	0.271292	0.297721	0.240638	0.269664	1.15507
[K].SRSPTPPSIAAK.[A]	1xPhospho [S/R]	Ttn-203; A0A0A0MTS7	262	273	6xx	1.99726e+07	2.32128e+07	1.83529e+07	1.72871e+07	1.3304e+07	1.36383e+07	1.782e+07	24228316	23764108	18971984	13201397	21931087	21931087	0.206921	0.202451	0.205992	0.236895	0.292285	0.250135	0.221908	0.270521	0.25836	0.259077	0.211252	0.21735	0.25836	0.858912
[K].WYHNDVELK.[S]		Ttn-203; A0A0A0MTS7	2305	2313	30xx	25494784	27218038	21253086	19514702	12731970	12944513	20383894	21797630	23326060	17094492	14496436	23650316	21797630	0.264132	0.237383	0.238544	0.26742	0.279717	0.237411	0.251338	0.243381	0.253597	0.233438	0.231975	0.234388	0.234388	1.07232
[R].YDGIHYLDIVDCK.[S]	1xCarbamidomethyl [C12]	Ttn-203; A0A0A0MTS7	1897	1909	28xx	32875704	51977092	9.79129e+06	27137305	2.28469e+07	2.01903e+07	2.49921e+07	2.58819e+07	29504933	2.14468e+07	1.70456e+07	1.88072e+07	2.14468e+07	0.340601	0.45332	0.109897	0.371877	0.50194	0.370303	0.37109	0.288983	0.320773	0.292872	0.272767	0.186391	0.288983	1.28412
[R].TQVVDCGEYTCK.[A]	2xCarbamidomethyl [C6; C11]	Ttn-203; A0A0A0MTS7	4531	4542	50xx	25366410	25017408	22308164	18319318	14822784	13564913	20313741	21739738	21280362	17582126	14768194	21310382	21280362	0.262802	0.21819	0.250386	0.251039	0.325652	0.24879	0.250713	0.242734	0.231357	0.240097	0.236324	0.211198	0.236324	1.06089
[R].ATSTAELVVQGEEVVPAK.[K]		Ttn-203	185	202	4xx	23117693	3.12322e+07	1.84298e+07	1.82905e+07	1.66848e+07	1.52573e+07	1.83602e+07	2.14781e+07	21166286	18109862	1.74135e+07	2.20909e+07	21166286	0.239505	0.272393	0.206856	0.250645	0.366559	0.27983	0.261519	0.239813	0.230116	0.247304	0.278654	0.218934	0.239813	1.09051
[R].ATSTAELVVQGEEVVPAK.[K]		Ttn-203	185	202	5xx	23117693	3.12322e+07	1.84298e+07	1.82905e+07	1.66848e+07	1.52573e+07	1.83602e+07	2.14781e+07	21166286	18109862	1.74135e+07	2.20909e+07	21166286	0.239505	0.272393	0.206856	0.250645	0.366559	0.27983	0.261519	0.239813	0.230116	0.247304	0.278654	0.218934	0.239813	1.09051
[K].EDGTQSLIIVPASPSDSGEWTVVAQNR.[A]		Ttn-203	1515	1541	26xx	22138178	26561638	19396886	19490662	17328568	16284489	19443774	21032056	22672852	19390720	16602250	22393388	21032056	0.229357	0.231658	0.21771	0.267091	0.380703	0.298669	0.249375	0.234833	0.246496	0.264795	0.265673	0.221931	0.246496	1.01168
[K].ELSATSSTQK.[I]		Ttn-203	846	855	16xx	23539946	21287750	21877076	16827202	14138741	13748694	19057476	19746048	20089508	15614320	15026366	21004118	19746048	0.24388	0.185662	0.245547	0.230592	0.310624	0.252161	0.244714	0.220474	0.21841	0.213225	0.240455	0.208163	0.21841	1.12043
[K].NSDIIVPHK.[Y]		Ttn-203; A0A0A0MTS7	1598	1606	27xx	22553706	24045190	16760161	16090428	13322924	13409934	1.64253e+07	19334492	20086976	14505792	12832886	19455280	19334492	0.233662	0.209711	0.188115	0.220496	0.292701	0.245947	0.227079	0.215879	0.218382	0.198088	0.205355	0.192813	0.205355	1.10579
[K].KAEAVATVVAAVDQAR.[V]		Ttn-203; A0A0A0MTS7	699	714	14xx	34774307	28573392	32786823	19621096	1.85341e+07	18187810	24097244	2.18969e+07	18881062	18553361	1.49043e+07	2.24172e+07	18881062	0.360271	0.249204	0.367998	0.268878	0.407189	0.333577	0.346924	0.24449	0.205272	0.25336	0.238502	0.222167	0.238502	1.4546
[K].ATSTATLYVEAR.[H]		Ttn-203; A0A0A0MTS7	3051	3062	38xx	26892362	32156582	11830204	21988824	18702656	17437676	20345740	20716284	25003048	18232328	16857900	17530694	18232328	0.278612	0.280455	0.132782	0.301325	0.410892	0.319819	0.29089	0.231307	0.271829	0.248976	0.269764	0.173739	0.248976	1.16834
[K].ATSTATLYVEAR.[H]		Ttn-203; A0A0A0MTS7	3051	3062	39xx	26892362	32156582	11830204	21988824	18702656	17437676	20345740	20716284	25003048	18232328	16857900	17530694	18232328	0.278612	0.280455	0.132782	0.301325	0.410892	0.319819	0.29089	0.231307	0.271829	0.248976	0.269764	0.173739	0.248976	1.16834
[K].VNVEVEFAEPEPER.[K]		Ttn-203; A0A0A0MTS7	1651	1664	28xx	24311970	25669286	19063950	17235098	14694322	14707090	18149524	20598732	19979526	16313074	14726996	18160858	18160858	0.251878	0.223876	0.213973	0.236182	0.32283	0.269738	0.24403	0.229995	0.217214	0.222768	0.235665	0.179985	0.222768	1.09545
[K].KEVGVSISGSTVR.[E]		Ttn-203	903	915	16xx	23146677	1.97795e+07	1.98066e+07	15958356	13332437	1.39886e+07	1.78689e+07	1.89817e+07	18031560	14237224	13071673	1.996e+07	18031560	0.239805	0.172508	0.222309	0.218686	0.29291	0.25656	0.231057	0.211939	0.196036	0.19442	0.209176	0.197815	0.197815	1.16805
[R].EAFAEDSGR.[F]		Ttn-203; A0A0A0MTS7	1007	1015	18xx	18558400	21095458	15664765	15412906	11829618	11955642	1.55388e+07	17918290	17949682	14744102	12725894	17821592	17821592	0.19227	0.183985	0.175821	0.211211	0.259893	0.219275	0.201741	0.200066	0.195146	0.201342	0.203643	0.176622	0.200066	1.00837
[K].SYDTGEVK.[V]		Ttn-203; A0A0A0MTS7	1910	1917	28xx	20363012	20046516	18511862	15835306	11581303	11182931	17173584	17733290	17840406	13706443	13290613	18500970	17733290	0.210966	0.174837	0.207776	0.217	0.254438	0.205103	0.209371	0.198001	0.193958	0.187172	0.212679	0.183355	0.193958	1.07947
[K].KIEAHFDAR.[S]		Ttn-203; A0A0A0MTS7	224	232	6xx	2.52651e+07	2.3203e+07	1.8067e+07	1.57745e+07	12507922	12192022	1.69208e+07	1.88323e+07	1.69607e+07	1.22281e+07	1.12536e+07	1.79982e+07	1.69607e+07	0.261752	0.202366	0.202784	0.216166	0.274795	0.22361	0.219888	0.210272	0.184394	0.166984	0.180083	0.178373	0.180083	1.22104
[K].DGIEINFQVQER.[H]		Ttn-203; A0A0A0MTS7	3188	3199	41xx	41330888	13347527	136063472	65670700	23465416	78902592	53500794	19226900	17593356	16376089	16174271	15197464	16376089	0.428199	0.116411	1.52717	0.899921	0.515528	1.44713	0.707724	0.214677	0.191272	0.223628	0.258824	0.150616	0.214677	3.29669
[K].VNWYLNGQLIR.[K]		Ttn-203; A0A0A0MTS7	1878	1888	28xx	17551110	20350488	11622350	13104264	13156726	11788208	13130495	16045172	18622256	15152294	12239605	15423822	15423822	0.181834	0.177488	0.130449	0.179575	0.289049	0.216204	0.180704	0.179152	0.202458	0.206916	0.195861	0.152859	0.195861	0.922616
[K].ELSESNTVR.[M]		Ttn-203; A0A0A0MTS7	4790	4798	52xx	12471186	2.44107e+06	16288998	9466650	4873709	6.09335e+06	7.78e+06	NA	NA	NA	NA	NA	NA	0.129205	0.0212899	0.182827	0.129727	0.107074	0.111756	0.12048							NA
[K].SAFQGSAPLTIK.[W]		Ttn-203	5240	5251	57xx	24509198	3.63565e+06	31409518	18628352	8146579	11169813	1.48991e+07	NA	NA	NA	NA	NA	NA	0.253922	0.0317085	0.352539	0.255274	0.178978	0.204862	0.229392							NA
[R].VSWYLDGNEITDLR.[K]		Ttn-203	5906	5919	64xx	6583233	390066	3.83468e+06	3.91336e+06	1.44337e+06	1.92929e+06	2.88199e+06	NA	NA	NA	NA	NA	NA	0.068204	0.00340198	0.0430403	0.0536269	0.0317104	0.0353845	0.0392124							NA
[K].IASLEIPLAK.[L]		Ttn-203	4711	4720	51xx	78904208	64176900	76208648	56919360	43071992	43473660	60548130	54249552	66890744	49049168	45832384	67869832	54249552	0.817468	0.559722	0.855363	0.779997	0.946278	0.797337	0.807402	0.605722	0.727226	0.669804	0.73342	0.672629	0.672629	1.20037
[K].HSLELSNLTVQDR.[G]		Ttn-203	4619	4631	51xx	69106786	58830246	63578850	49025888	36995902	41367050	53928067	48952110	56699314	39927210	38489801	55236962	48952110	0.715964	0.513091	0.713607	0.671828	0.812789	0.7587	0.714785	0.546573	0.616426	0.545237	0.615922	0.54743	0.54743	1.30571
[K].ALTTFVGK.[A]		Ttn-203	4572	4579	51xx	40787688	36071288	22503970	32220516	22449474	22093720	27362243	28164156	36985488	25514896	22354452	28233206	28164156	0.422571	0.314597	0.252584	0.441535	0.493208	0.405214	0.413892	0.314466	0.4021	0.348425	0.357721	0.279807	0.348425	1.18789
[K].ELEAVQSAINK.[K]		Ttn-203	4662	4672	51xx	35361800	32077488	30222898	25223598	20575186	21878252	27723248	26513914	28523586	20539692	21390240	29282686	26513914	0.366357	0.279765	0.339221	0.345653	0.452031	0.401262	0.356005	0.29604	0.310104	0.280485	0.342291	0.290208	0.29604	1.20256
[K].ELEAVQSAINKK.[I]		Ttn-203	4662	4673	51xx	32850364	24569294	36091280	22992210	1.72965e+07	1.8478e+07	23780752	2.48139e+07	31850487	2.1622e+07	19694635	27166538	2.48139e+07	0.340338	0.214282	0.405087	0.315075	0.379999	0.338899	0.339618	0.277059	0.346273	0.295264	0.315158	0.269236	0.295264	1.15022
[K].IHLECQVDEDR.[K]	1xCarbamidomethyl [C5]	Ttn-203	4674	4684	51xx	2.7737e+07	25436953	22094178	2.06845e+07	1.48299e+07	15722827	2.13893e+07	20571963	22761687	16093089	16277812	23041712	20571963	0.287363	0.221849	0.247984	0.28345	0.325808	0.288368	0.285407	0.229696	0.247461	0.219763	0.260481	0.228357	0.229696	1.24254
[K].DGAALSPSPDCR.[V]	1xCarbamidomethyl [C11]	Ttn-203	4600	4611	51xx	27167984	20736628	22078860	19369690	14251769	13935944	20053159	15377508	19589842	15081595	12834826	19162994	15377508	0.281467	0.180855	0.247812	0.265433	0.313107	0.255595	0.260514	0.171697	0.212978	0.205951	0.205386	0.189916	0.205386	1.26841
[K].EPPVFSSFPPIVETLK.[N]		Ttn-203; A0A0A0MTS7	6528	6543	71xx	82911879	71000205	72272189	57105933	4.11785e+07	41438026	64053069	51738463	70604505	46565967	4.56042e+07	64842476	51738463	0.858988	0.619231	0.81118	0.782553	0.904679	0.760002	0.796867	0.577684	0.767601	0.635894	0.729769	0.642626	0.642626	1.24002
[K].DIEQTVGLPVTLTCR.[L]	1xCarbamidomethyl [C14]	Ttn-203; A0A0A0MTS7	7196	7210	78xx	67143937	59638190	67236498	58743910	41464642	4.14545e+07	59191050	49892221	65012333	45254752	46576498	60148596	49892221	0.695628	0.520137	0.75466	0.804999	0.910965	0.760304	0.757482	0.55707	0.706804	0.617988	0.745327	0.596107	0.617988	1.22572
[K].DTGGVLGTSCILECK.[V]	2xCarbamidomethyl [C10; C14]	Ttn-203	6821	6835	74xx	50938208	60028228	44643092	37831260	30535482	29449646	41237176	39607168	48122316	34718316	33880268	44496796	39607168	0.527733	0.523539	0.501072	0.518422	0.670855	0.540127	0.525636	0.442233	0.523178	0.474105	0.54216	0.440989	0.474105	1.10869
[K].NITFTSVIR.[G]		Ttn-203	6922	6930	75xx	45625100	42890656	28137580	45998900	38313184	36065212	40601920	35662100	49934144	38607748	35429980	38257216	38257216	0.472688	0.374073	0.315815	0.630348	0.841729	0.661461	0.551518	0.398184	0.542876	0.527218	0.566958	0.379151	0.527218	1.04609
[K].VAGTPELSVEWYK.[D]		Ttn-203; A0A0A0MTS7	6740	6752	73xx	50321812	46860608	45437236	36556068	30015506	28505248	40996652	36046196	44630468	33424032	30700540	44813172	36046196	0.521347	0.408697	0.509986	0.500947	0.659431	0.522806	0.515666	0.402473	0.485215	0.456431	0.491277	0.444124	0.456431	1.12978
[K].TCILEILSSTK.[G]	1xCarbamidomethyl [C2]	Ttn-203	7053	7063	76xx	51351380	47139032	43527120	38180872	32448182	30952350	40853996	35971096	43844448	33847708	30789056	42363584	35971096	0.532013	0.411125	0.488547	0.523213	0.712877	0.567688	0.527613	0.401634	0.47667	0.462216	0.492693	0.419847	0.462216	1.14149
[R].ALLTVQEPPSFVK.[E]		Ttn-203	6898	6910	74xx	49179000	45433780	44350944	37182084	30692998	29281518	40766514	33358346	42896596	31679036	30883268	41401644	33358346	0.509507	0.396253	0.497793	0.509526	0.674316	0.537043	0.509517	0.372462	0.466365	0.432601	0.494201	0.410314	0.432601	1.1778
[R].ALLTVQEPPSFVK.[E]		Ttn-203	6898	6910	75xx	49179000	45433780	44350944	37182084	30692998	29281518	40766514	33358346	42896596	31679036	30883268	41401644	33358346	0.509507	0.396253	0.497793	0.509526	0.674316	0.537043	0.509517	0.372462	0.466365	0.432601	0.494201	0.410314	0.432601	1.1778
[K].EIRPGGNYTITCVGNTPHLR.[I]	1xCarbamidomethyl [C12]	Ttn-203; A0A0A0MTS7	7323	7342	79xx	46463496	40175571	41709159	34495744	22615147	23443703	3.73357e+07	31176665	41089596	2.75209e+07	24437127	37254429	31176665	0.481374	0.350393	0.468142	0.472714	0.496848	0.429974	0.470428	0.348102	0.44672	0.375819	0.391048	0.369213	0.375819	1.25174
[K].EPEPLEVLPGK.[N]		Ttn-203; A0A0A0MTS7	6911	6921	75xx	43679808	38019296	39747980	33829712	26226730	25249530	35924504	28814528	38220168	28343748	26288578	36730552	28814528	0.452534	0.331587	0.44613	0.463587	0.576193	0.463094	0.457814	0.321728	0.415524	0.387056	0.420676	0.364021	0.387056	1.18281
[R].TYFTNNVATLVFNK.[V]		Ttn-203; A0A0A0MTS7	7140	7153	77xx	42159742	40172067	29091029	32734498	2.85367e+07	27666122	3.09128e+07	28362747	3.80404e+07	28492613	27379731	34190307	28492613	0.436786	0.350362	0.326517	0.448578	0.626943	0.507416	0.442682	0.316683	0.413569	0.389088	0.438136	0.338846	0.389088	1.13774
[R].ISFVNNVATLQFAK.[V]		Ttn-203	6672	6685	72xx	39127924	35021384	26804780	30890810	26740996	25435336	28847795	27321936	35653960	27216948	24072400	31760836	27321936	0.405375	0.305441	0.300856	0.423313	0.587491	0.466502	0.414344	0.305062	0.387624	0.371668	0.385212	0.314768	0.371668	1.11482
[K].ILQTDLSHSGQYSCSASNPLGTASSTAR.[L]	1xCarbamidomethyl [C14]	Ttn-203	7247	7274	78xx	36874528	31424854	31339370	25295268	18815910	18518360	28317319	26843930	28174910	21425146	20187476	29195476	26843930	0.38203	0.274073	0.351752	0.346635	0.41338	0.33964	0.349193	0.299725	0.306313	0.292577	0.323044	0.289344	0.299725	1.16504
[K].SSCTAVVDVSDR.[AM]	1xCarbamidomethyl [C3]	Ttn-203; A0A0A0MTS7	6798	6809	73xx	38121300	30868700	34963452	28492030	21724632	21124134	29680365	25012128	29604920	21539472	21386074	30269594	25012128	0.394946	0.269223	0.392428	0.390442	0.477284	0.387431	0.391435	0.279272	0.32186	0.294138	0.342225	0.299989	0.299989	1.30483
[K].SSCTAVVDVSDR.[AM]	1xCarbamidomethyl [C3]	Ttn-203; A0A0A0MTS7	6798	6809	74xx	38121300	30868700	34963452	28492030	21724632	21124134	29680365	25012128	29604920	21539472	21386074	30269594	25012128	0.394946	0.269223	0.392428	0.390442	0.477284	0.387431	0.391435	0.279272	0.32186	0.294138	0.342225	0.299989	0.299989	1.30483
[K].GDAGHYSCEIENEAGR.[D]	1xCarbamidomethyl [C8]	Ttn-203	7064	7079	76xx	38059286	30206744	31546642	2.24192e+07	15383568	1.50084e+07	2.6313e+07	2.31836e+07	25870691	1.65642e+07	1.53924e+07	2.51607e+07	2.31836e+07	0.394304	0.263449	0.354078	0.307223	0.337972	0.275264	0.322597	0.258856	0.281262	0.226197	0.246313	0.249357	0.249357	1.29372
[K].VAGSSPISIAWFHEK.[T]		Ttn-203	6836	6850	74xx	42574196	46347492	13213723	24411008	20211480	17777376	22311244	23195510	28001756	20457116	16137265	22095966	22095966	0.44108	0.404222	0.14831	0.334517	0.44404	0.326049	0.369369	0.258989	0.304431	0.279358	0.258232	0.218984	0.258989	1.4262
[K].LNSLTVVAGEPAELQASIEGAQPISVQWLK.[E]		Ttn-203	6629	6658	72xx	31264640	28068932	28690562	23018808	19408018	18755548	25543870	21998862	27870466	21570124	19110128	27199010	21998862	0.32391	0.244804	0.322022	0.315439	0.426388	0.34399	0.322966	0.245628	0.303003	0.294557	0.305804	0.269558	0.294557	1.09645
[R].ALLTVQEPPSFVKEPEPLEVLPGK.[N]		Ttn-203	6898	6921	74xx	35606408	22896800	39701440	25006688	14038325	15370694	23951744	21072316	28541004	16952686	16606772	27628912	21072316	0.368891	0.199695	0.445607	0.34268	0.308418	0.281909	0.325549	0.235282	0.310293	0.231502	0.265745	0.273818	0.265745	1.22504
[R].ALLTVQEPPSFVKEPEPLEVLPGK.[N]		Ttn-203	6898	6921	75xx	35606408	22896800	39701440	25006688	14038325	15370694	23951744	21072316	28541004	16952686	16606772	27628912	21072316	0.368891	0.199695	0.445607	0.34268	0.308418	0.281909	0.325549	0.235282	0.310293	0.231502	0.265745	0.273818	0.265745	1.22504
[K].ITGSPEIQVVWYR.[N]		Ttn-203	6460	6472	70xx	26543538	27569702	18723022	19127428	19485158	17164584	19306293	20265506	22399164	18370964	17228950	23336936	20265506	0.274998	0.24045	0.210146	0.262113	0.428083	0.31481	0.268556	0.226274	0.24352	0.25087	0.275701	0.231282	0.24352	1.10281
[K].NTEVSLECELSGTPPFEVVWYK.[D]	1xCarbamidomethyl [C8]	Ttn-203	6544	6565	71xx	2.13107e+07	2.41286e+07	1.77433e+07	1.85571e+07	1.63835e+07	1.52087e+07	1.81502e+07	1.89962e+07	20686954	16976789	15796293	2.08973e+07	1.89962e+07	0.220784	0.210438	0.19915	0.254297	0.35994	0.278938	0.237541	0.212102	0.224905	0.231831	0.252776	0.207105	0.224905	1.05618
[K].AQNEVGSDACVCAVK.[L]	2xCarbamidomethyl [C10; C12]	Ttn-203	6604	6618	71xx	24767020	23056202	23349496	19006260	14837791	13913764	21031231	18522800	23142266	16938806	15713426	23114736	18522800	0.256593	0.201086	0.262074	0.260453	0.325982	0.255188	0.258523	0.206816	0.251599	0.231312	0.25145	0.22908	0.231312	1.11764
[K].LLTSSQK.[H]		Ttn-203; A0A0A0MTS7	6756	6762	73xx	20639170	17247634	20082360	16513024	12561632	12513094	16880329	15276721	19363216	14251245	13380151	19270068	15276721	0.213827	0.150426	0.225404	0.226287	0.275975	0.229499	0.225845	0.170572	0.210514	0.194612	0.214112	0.190977	0.194612	1.16049
[K].APPVFTQKPPPVGALK.[G]		Ttn-203	7469	7484	81xx	100507702	82520100	90029026	63924748	47856155	45176948	73222424	63161625	84085908	52638740	51857495	74424163	63161625	1.04129	0.719703	1.01048	0.875995	1.05139	0.828576	0.943239	0.705229	0.914169	0.718822	0.829835	0.737586	0.737586	1.27882
[R].VVPPSFVR.[R]		Ttn-203	7751	7758	84xx	83987400	70438784	79345272	65109284	49057712	49581416	67774034	62574028	76861176	53343316	53301864	72357304	62574028	0.870131	0.614335	0.890568	0.892228	1.07778	0.909357	0.891398	0.698669	0.835622	0.728444	0.852948	0.717103	0.728444	1.2237
[K].NEYPLSQSPNCGITTTEK.[S]	1xCarbamidomethyl [C11]	Ttn-203	7976	7993	86xx	59893536	16833380	63741092	15503239	11405869	12014751	1.61683e+07	49552024	63722860	12068914	11565339	57715144	49552024	0.620512	0.146813	0.715428	0.212449	0.250583	0.220359	0.235471	0.553272	0.692785	0.16481	0.185071	0.57199	0.553272	0.425598
[K].DVHETLGFPVAFECR.[I]	1xCarbamidomethyl [C14]	Ttn-203; A0A0A0MTS7	8137	8151	88xx	53810153	54195087	45772432	40461410	31069706	29895386	43116921	40549172	47043583	33657592	31685742	46991049	40549172	0.557487	0.472665	0.513748	0.554465	0.682592	0.548302	0.551383	0.452751	0.51145	0.45962	0.507042	0.465708	0.465708	1.18397
[R].ISFVDNIATLQLGSPEASQSGK.[Y]		Ttn-203	7613	7634	82xx	50256814	46661241	44782587	37662258	29771204	29340227	4.12224e+07	36021979	45020981	32450938	31674064	43868625	36021979	0.520673	0.406958	0.502638	0.516106	0.654064	0.53812	0.51839	0.402202	0.489461	0.443142	0.506855	0.434763	0.443142	1.1698
[K].NNVASLVINK.[V]		Ttn-203; A0A0A0MTS7	8085	8094	87xx	45338292	36927236	43891268	34276720	26132942	26917808	35601978	32868928	40944036	30900340	27474042	40525132	32868928	0.469716	0.322062	0.492634	0.469712	0.574133	0.493691	0.481175	0.366997	0.445137	0.421968	0.439646	0.401627	0.421968	1.14031
[K].DSCSAQLGVQEPPR.[F]	1xCarbamidomethyl [C3]	Ttn-203; A0A0A0MTS7	8306	8319	89xx	39797764	36650756	35758872	31027748	23026468	22954584	33393310	31826618	37175404	24436028	24990768	35303800	31826618	0.412315	0.319651	0.401356	0.42519	0.505884	0.421003	0.416659	0.355359	0.404165	0.333693	0.399908	0.349881	0.355359	1.1725
[K].SSCTVSVHVSDR.[V]	1xCarbamidomethyl [C3]	Ttn-203	7739	7750	83xx	39099922	37122883	35038694	29439688	2.32929e+07	22861835	32239191	29343086	34321687	23366658	21720943	33515993	29343086	0.405085	0.323769	0.393273	0.403428	0.511738	0.419302	0.404257	0.327629	0.37314	0.31909	0.347583	0.332163	0.332163	1.21704
[K].SSCTVSVHVSDR.[V]	1xCarbamidomethyl [C3]	Ttn-203	7739	7750	84xx	39099922	37122883	35038694	29439688	2.32929e+07	22861835	32239191	29343086	34321687	23366658	21720943	33515993	29343086	0.405085	0.323769	0.393273	0.403428	0.511738	0.419302	0.404257	0.327629	0.37314	0.31909	0.347583	0.332163	0.332163	1.21704
[K].VDGTPEIR.[I]		Ttn-203; A0A0A0MTS7	8056	8063	87xx	36619044	29381270	34969544	27099732	19767232	20152896	28240501	26819834	30940836	22276772	21998518	31664914	26819834	0.379383	0.25625	0.392497	0.371362	0.43428	0.369618	0.375372	0.299456	0.336384	0.304206	0.352025	0.313818	0.313818	1.19615
[K].NFDTSLHIFNLEAPDIGEYHCK.[A]	1xCarbamidomethyl [C21]	Ttn-203	7523	7544	81xx	35962055	41067714	20698455	2.16182e+07	18783939	17716835	2.11583e+07	28160982	27000654	21754823	16547028	26517645	26517645	0.372576	0.358174	0.232319	0.296246	0.412677	0.324939	0.341556	0.314431	0.293547	0.297079	0.264789	0.262805	0.293547	1.16355
[K].QGESIQLECK.[I]	1xCarbamidomethyl [C9]	Ttn-203; A0A0A0MTS7	7391	7400	80xx	28156912	27534066	26217946	24223170	16666238	16796286	25220558	22190042	25688220	19217962	18757918	25143376	22190042	0.291713	0.24014	0.294269	0.331943	0.366152	0.308056	0.301162	0.247762	0.279278	0.262436	0.300168	0.249185	0.262436	1.14757
[R].HHITFVR.[N]		Ttn-203	7704	7710	83xx	28757272	27951696	20992172	17921802	15147520	15108543	19456987	21629112	22310708	15826752	13848438	23013466	21629112	0.297933	0.243782	0.235615	0.245592	0.332786	0.277101	0.261347	0.241499	0.242558	0.216126	0.221606	0.228077	0.228077	1.14587
[R].VSGSAPISVGWFLDGNEIISSPK.[C]		Ttn-203	7777	7799	84xx	28852379	29846854	17146205	2.22679e+07	1.92046e+07	1.81342e+07	2.07362e+07	20961599	27933449	1.95559e+07	18589034	22036521	20961599	0.298918	0.260311	0.192448	0.305149	0.421919	0.332593	0.302034	0.234046	0.303688	0.26705	0.297466	0.218395	0.26705	1.131
[K].VDHSDVGEYTCK.[A]	1xCarbamidomethyl [C11]	Ttn-203	8095	8106	87xx	30682908	25348617	25476566	1.99981e+07	1.48201e+07	1.49421e+07	2.26734e+07	19835153	2.38723e+07	15682445	1.45266e+07	23886057	19835153	0.317883	0.221079	0.285948	0.274045	0.325593	0.274048	0.279998	0.221469	0.259535	0.214156	0.232458	0.236725	0.232458	1.20451
[K].VSIQVSDR.[I]		Ttn-203	8684	8691	93xx	72510128	69528848	66754752	54851404	40563440	41458440	60803078	61812712	65385872	49617952	45588416	64734780	61812712	0.751223	0.606399	0.749253	0.751658	0.891166	0.760376	0.751441	0.690168	0.710865	0.677571	0.729516	0.641559	0.690168	1.08878
[K].VSIQVSDR.[I]		Ttn-203	8684	8691	94xx	72510128	69528848	66754752	54851404	40563440	41458440	60803078	61812712	65385872	49617952	45588416	64734780	61812712	0.751223	0.606399	0.749253	0.751658	0.891166	0.760376	0.751441	0.690168	0.710865	0.677571	0.729516	0.641559	0.690168	1.08878
[RK].LILTEGK.[N]		Ttn-203; A0A0A0MTS7	9157	9163	98xx	62472544	60916180	59509165	4.52879e+07	3.42645e+07	3.35015e+07	5.23985e+07	52153818	56736620	41405349	3.84185e+07	55765528	52153818	0.647232	0.531283	0.667929	0.620605	0.752781	0.614441	0.633918	0.582322	0.616832	0.565422	0.614782	0.552668	0.582322	1.0886
[RK].LILTEGK.[N]		Ttn-203; A0A0A0MTS7	9157	9163	99xx	62472544	60916180	59509165	4.52879e+07	3.42645e+07	3.35015e+07	5.23985e+07	52153818	56736620	41405349	3.84185e+07	55765528	52153818	0.647232	0.531283	0.667929	0.620605	0.752781	0.614441	0.633918	0.582322	0.616832	0.565422	0.614782	0.552668	0.582322	1.0886
[R].KKPFPVETLK.[G]		Ttn-203	8416	8425	91xx	62250193	62895738	51413218	38544146	3.33431e+07	3.06632e+07	44978682	51639963	55949636	39828155	3.53159e+07	51745286	51639963	0.644928	0.548548	0.57706	0.528191	0.732537	0.562384	0.569722	0.576585	0.608276	0.543884	0.565133	0.512826	0.565133	1.00812
[K].IINVVPGDSGVYSFEVQNPVGK.[D]		Ttn-203	8658	8679	93xx	64147118	66451254	49269920	45957019	36041917	34737998	4.76135e+07	51538230	57955568	43273698	37554990	54222408	51538230	0.664581	0.579557	0.553004	0.629774	0.79183	0.637119	0.633446	0.575449	0.630084	0.590935	0.600963	0.537375	0.590935	1.07194
[K].APAIFVK.[R]		Ttn-203	8879	8885	96xx	58670324	56320836	52126852	39872740	31912236	30762034	45999796	47731460	53301292	40652824	34960128	51157100	47731460	0.60784	0.491205	0.58507	0.546398	0.701102	0.564197	0.574633	0.532944	0.579483	0.555145	0.55944	0.506996	0.555145	1.0351
[K].NNALLLQVK.[R]		Ttn-203	9315	9323	100xx	50177624	50551256	46441696	39935372	31338594	30612502	43188534	43580204	48839848	38316852	33636584	46914140	43580204	0.519853	0.440885	0.52126	0.547256	0.688499	0.561454	0.534258	0.486594	0.530979	0.523246	0.53826	0.464946	0.523246	1.02105
[K].GSPPFTVSWFK.[G]		Ttn-203	8813	8823	95xx	52563468	59306036	40609036	34932900	30358162	28109398	37770968	42229672	45685080	34410804	30930330	45035504	42229672	0.544571	0.51724	0.455794	0.478704	0.66696	0.515546	0.516393	0.471514	0.496681	0.469906	0.494954	0.446328	0.471514	1.09518
[K].GKPLILEGTFSGTPPISVTWK.[K]		Ttn-203	8895	8915	96xx	47246744	52427356	29338608	29877006	26108556	23807944	29607807	37666344	41521492	32191394	26792116	40198788	37666344	0.489488	0.457247	0.329295	0.409421	0.573597	0.436654	0.446951	0.420562	0.451415	0.439598	0.428733	0.398393	0.428733	1.04249
[K].DSCTAQLNIK.[E]	1xCarbamidomethyl [C3]	Ttn-203; A0A0A0MTS7	9247	9256	99xx	41592308	41233944	37422980	33213278	25956062	24604902	35318129	37575908	39148400	28263510	26568402	39843372	37575908	0.430907	0.359624	0.420034	0.455139	0.570247	0.451271	0.441089	0.419553	0.425615	0.38596	0.425153	0.394871	0.419553	1.05133
[K].KPPVFDQHLAPVTASEGDSVQLSCHVQGSEPIR.[I]	1xCarbamidomethyl [C24]	Ttn-203	9357	9389	101xx	53399948	53773117	3.73839e+07	2.96839e+07	2.23721e+07	20714286	3.35339e+07	39969227	37038585	2.52344e+07	2.2039e+07	36322587	36322587	0.553237	0.468985	0.419595	0.406774	0.491507	0.379914	0.44429	0.446275	0.402678	0.344595	0.352673	0.359978	0.359978	1.23421
[K].GADVHLECELQGTPPFQVSWHK.[D]	1xCarbamidomethyl [C8]	Ttn-203	8426	8447	91xx	52850964	55527744	35931883	27666823	2.02226e+07	1.93113e+07	31799353	37658534	35622854	26703970	22497907	36704250	35622854	0.54755	0.484288	0.403298	0.379133	0.444283	0.354183	0.423791	0.420475	0.387286	0.364663	0.360016	0.36376	0.364663	1.16214
[K].EVQLQTTIEGAEPISVAWFK.[D]		Ttn-203	8521	8540	92xx	40794517	45617333	3.54997e+07	29543266	25268695	25681298	3.25215e+07	35457090	39798068	30285121	28880008	39336614	35457090	0.422642	0.397854	0.398447	0.404847	0.555145	0.471013	0.413744	0.395895	0.432678	0.413567	0.462144	0.389848	0.413567	1.00043
[K].VTVGDSASLQCQLAGTPEIGVSWYK.[G]	1xCarbamidomethyl [C11]	Ttn-203	8985	9009	97xx	40450120	42406894	35353316	30718974	23776424	22243843	33036145	33662008	39828440	27761049	25940056	37485590	33662008	0.419074	0.369854	0.396804	0.420959	0.522361	0.407967	0.413521	0.375852	0.433008	0.379098	0.415098	0.371504	0.379098	1.0908
[K].ATNDAGSALCTSSIVIK.[E]	1xCarbamidomethyl [C10]	Ttn-203	9337	9353	100xx	40427968	38748412	39988920	29500360	23984968	24247928	34124386	33019372	38375056	28983484	25560824	39620144	33019372	0.418844	0.337946	0.448834	0.404259	0.526942	0.444724	0.431784	0.368677	0.417208	0.395792	0.40903	0.392658	0.395792	1.09094
[K].VKEPPVFR.[K]		Ttn-203	8408	8415	90xx	38351052	37504168	34972248	26833102	20440620	20769248	30902675	33007936	34498752	26013084	23798620	33012160	33007936	0.397327	0.327094	0.392527	0.367708	0.449074	0.380922	0.386725	0.368549	0.375065	0.355229	0.380831	0.327169	0.368549	1.04932
[K].VKEPPVFR.[K]		Ttn-203	8408	8415	91xx	38351052	37504168	34972248	26833102	20440620	20769248	30902675	33007936	34498752	26013084	23798620	33012160	33007936	0.397327	0.327094	0.392527	0.367708	0.449074	0.380922	0.386725	0.368549	0.375065	0.355229	0.380831	0.327169	0.368549	1.04932
[K].GSTELVPGAR.[C]		Ttn-203	8824	8833	95xx	40772944	40443556	36059864	27163524	20838958	20844300	31611694	32880070	33116880	26176826	24061624	34477644	32880070	0.422418	0.35273	0.404734	0.372236	0.457826	0.382299	0.393517	0.367121	0.360041	0.357465	0.385039	0.341693	0.360041	1.09298
[K].DSCSAQLGVQEPPR.[F]	1xCarbamidomethyl [C3]	Ttn-203; A0A0A0MTS7	8306	8319	90xx	39797764	36650756	35758872	31027748	23026468	22954584	33393310	31826618	37175404	24436028	24990768	35303800	31826618	0.412315	0.319651	0.401356	0.42519	0.505884	0.421003	0.416659	0.355359	0.404165	0.333693	0.399908	0.349881	0.355359	1.1725
[K].LTDISTIIGK.[E]		Ttn-203	8511	8520	92xx	36840168	36526524	35699192	27655928	19960004	20881176	31677560	31756770	35803444	26449076	24047112	33704636	31756770	0.381674	0.318568	0.400686	0.378984	0.438515	0.382975	0.382324	0.354579	0.389249	0.361182	0.384807	0.334032	0.361182	1.05854
[K].DSPNIQTSFLDNIATLNIFK.[T]		Ttn-203	9112	9131	98xx	36041773	45483319	2.21607e+07	27967111	2.50748e+07	23860563	2.6521e+07	31681982	37479908	29082821	26445586	31766774	31681982	0.373402	0.396685	0.248731	0.383248	0.550887	0.437619	0.389967	0.353744	0.407476	0.397148	0.423188	0.314827	0.397148	0.981917
[R].CNITTTEK.[S]	1xCarbamidomethyl [C1]	Ttn-203; A0A0A0MTS7	8927	8934	96xx	30455890	30899282	28649506	22792675	17111713	1.93358e+07	2.57211e+07	29684332	28118708	19437860	19102064	29041186	28118708	0.315531	0.269489	0.321561	0.31234	0.375939	0.354632	0.318546	0.33144	0.305702	0.265439	0.305675	0.287815	0.305675	1.0421
[K].KLTDISTIIGK.[E]		Ttn-203	8510	8520	92xx	30998251	30386240	26456475	22351990	18899927	19428312	2.44042e+07	27355670	27145791	22114836	2.06845e+07	27357375	27145791	0.32115	0.265015	0.296946	0.306301	0.415226	0.356329	0.313726	0.305439	0.295125	0.301995	0.330998	0.271127	0.301995	1.03884
[K].VTTGDTCTLECTVSGTPELSTK.[W]	2xCarbamidomethyl [C7; C11]	Ttn-203	8610	8631	93xx	27344798	29363914	25558318	21002492	16523447	15756576	23280405	24451450	26237750	20258774	18360332	26797750	24451450	0.283299	0.256099	0.286866	0.287808	0.363015	0.288987	0.287337	0.273012	0.285253	0.276649	0.293806	0.265581	0.276649	1.03863
[R].SLSGQYSCTATNPIGSASSGAK.[L]	1xCarbamidomethyl [C8]	Ttn-203	9135	9156	98xx	26750356	26485752	25249020	19774238	16471078	15059784	22511629	23878748	24852144	18639392	17309224	24637746	23878748	0.277141	0.230997	0.283394	0.270977	0.361865	0.276207	0.276674	0.266617	0.270189	0.254535	0.276986	0.244174	0.266617	1.03772
[R].AENSVGEVSSSTFLTVQEQK.[L]		Ttn-203	9048	9067	97xx	27345133	30528386	24737441	21338109	1.73758e+07	16609963	23037775	23478997	26261210	23179639	1.93331e+07	24410571	23478997	0.283303	0.266255	0.277652	0.292408	0.38174	0.304638	0.287855	0.262154	0.285508	0.316536	0.309373	0.241923	0.285508	1.00822
[R].AENSVGEVSSSTFLTVQEQK.[L]		Ttn-203	9048	9067	98xx	27345133	30528386	24737441	21338109	1.73758e+07	16609963	23037775	23478997	26261210	23179639	1.93331e+07	24410571	23478997	0.283303	0.266255	0.277652	0.292408	0.38174	0.304638	0.287855	0.262154	0.285508	0.316536	0.309373	0.241923	0.285508	1.00822
[R].NAAGSASSSTSLK.[V]		Ttn-203	8395	8407	90xx	26861674	24428504	24995392	20361694	15277950	15392323	22395099	23433212	24704368	18808614	16210784	23391432	23391432	0.278294	0.213054	0.280547	0.279027	0.335652	0.282306	0.279787	0.261643	0.268582	0.256846	0.259409	0.231823	0.259409	1.07856
[R].DVQETVGLPVVFECAVSGSEPISVSWYK.[D]	1xCarbamidomethyl [C14]	Ttn-203	9078	9105	98xx	23337688	28332016	20268200	17792266	14571232	13728829	19030233	21596238	23688536	18814946	15857704	23144720	21596238	0.241784	0.247099	0.227489	0.243817	0.320126	0.251796	0.245458	0.241132	0.257538	0.256932	0.253758	0.229377	0.253758	0.96729
[R].LNDYSIEK.[G]		Ttn-203; A0A0A0MTS7	8887	8894	96xx	24461744	22373820	23965394	17384166	12625604	13004954	19878993	19742858	22247750	15296990	14328665	22056668	19742858	0.25343	0.195134	0.268987	0.238225	0.277381	0.23852	0.245975	0.220438	0.241874	0.208892	0.22929	0.218594	0.220438	1.11584
[K].KLSETVEETEGNSFK.[L]	1xPhospho [T/S]	Ttn-203	9267	9281	100xx	26227572	24630942	24170806	17480424	15927064	12650762	20825615	19996516	18518720	16023650	14867165	20577014	18518720	0.271724	0.21482	0.271292	0.239544	0.349913	0.232024	0.255418	0.223271	0.201333	0.218815	0.237908	0.20393	0.218815	1.16728
[K].VDKGDSGQYTCYAVNEVGK.[D]	1xCarbamidomethyl [C11]	Ttn-203; A0A0A0MTS7	9228	9246	99xx	19869772	17804030	18396802	13689869	10095919	9788250	1.57469e+07	16951034	18463534	13920911	11437561	18024940	16951034	0.205856	0.155279	0.206485	0.1876	0.221804	0.179523	0.196728	0.189266	0.200733	0.190101	0.183026	0.178638	0.189266	1.03942
[RK].LFFVSEPQSIR.[V]		Ttn-203; A0A0A0MTS7	9467	9477	102xx	69056768	77538584	55020076	54486248	42969804	43609420	54753162	61058240	66125744	50521496	45957332	64009704	61058240	0.715446	0.676256	0.617543	0.746654	0.944033	0.799827	0.73105	0.681744	0.718909	0.68991	0.735419	0.634373	0.68991	1.05963
[R].IEAEPIQFTK.[R]		Ttn-203; A0A0A0MTS7	9842	9851	107xx	65916076	65565060	63148948	49630136	34994296	35211492	56389542	60855372	60008968	42937968	41110200	59130620	59130620	0.682907	0.571828	0.708781	0.680108	0.768814	0.645803	0.681508	0.679479	0.652408	0.586351	0.657854	0.586018	0.652408	1.0446
[R].IEAEPIQFTK.[R]		Ttn-203; A0A0A0MTS7	9842	9851	108xx	65916076	65565060	63148948	49630136	34994296	35211492	56389542	60855372	60008968	42937968	41110200	59130620	59130620	0.682907	0.571828	0.708781	0.680108	0.768814	0.645803	0.681508	0.679479	0.652408	0.586351	0.657854	0.586018	0.652408	1.0446
[R].LTQTEPVTLIK.[D]		Ttn-203	9663	9673	105xx	71244984	68050728	65677664	51735452	39657828	41467180	58706558	58956104	65056604	48240172	44725800	63898784	58956104	0.738116	0.593507	0.737164	0.708959	0.87127	0.760537	0.73764	0.658273	0.707285	0.658756	0.715712	0.633274	0.658756	1.11975
[R].LTQTEPVTLIK.[D]		Ttn-203	9663	9673	106xx	71244984	68050728	65677664	51735452	39657828	41467180	58706558	58956104	65056604	48240172	44725800	63898784	58956104	0.738116	0.593507	0.737164	0.708959	0.87127	0.760537	0.73764	0.658273	0.707285	0.658756	0.715712	0.633274	0.658756	1.11975
[K].LTVIEPAWER.[H]		Ttn-203; A0A0A0MTS7	9753	9762	106xx	80455648	68253168	71035816	51237940	39216772	41085984	59745554	57678032	64111364	47707172	45768208	6.29509e+07	57678032	0.833541	0.595273	0.797303	0.702141	0.86158	0.753545	0.775424	0.644002	0.697009	0.651478	0.732393	0.62388	0.651478	1.19025
[K].LTVIEPAWER.[H]		Ttn-203; A0A0A0MTS7	9753	9762	107xx	80455648	68253168	71035816	51237940	39216772	41085984	59745554	57678032	64111364	47707172	45768208	6.29509e+07	57678032	0.833541	0.595273	0.797303	0.702141	0.86158	0.753545	0.775424	0.644002	0.697009	0.651478	0.732393	0.62388	0.651478	1.19025
[K].LTIADVR.[A]		Ttn-203; A0A0A0MTS7	9814	9820	107xx	61123180	59169124	56410792	47094688	35123664	35549768	51752740	53312628	56153608	44103444	39404428	56933988	53312628	0.633252	0.516046	0.633153	0.645364	0.771656	0.652007	0.639308	0.595261	0.610493	0.602266	0.630558	0.564249	0.602266	1.0615
[K].HEDLETSAELR.[I]		Ttn-203	9831	9841	107xx	61519487	64012151	60835203	55058536	3.59529e+07	42480296	5.79469e+07	72501689	13559411	44755265	8699669	56982347	44755265	0.637358	0.558285	0.682812	0.754497	0.789873	0.779118	0.718654	0.809516	0.147416	0.611167	0.139214	0.564728	0.564728	1.27257
[R].AVPPEEIPPAVAPSIPLLLPLPEEK.[K]		Ttn-203	9964	9988	111xx	53943624	51387384	52370448	38284588	27986430	28993792	44835986	44248096	46501160	34686080	31373406	46463256	44248096	0.55887	0.448177	0.587804	0.524634	0.614853	0.531766	0.545318	0.494051	0.505553	0.473665	0.502044	0.460478	0.494051	1.10377
[K].VGGDPIPNVK.[W]		Ttn-203; A0A0A0MTS7	9490	9499	103xx	51521632	50439392	47006128	35639832	26902152	26972828	41322980	41914936	45386544	32829120	29010804	44881368	41914936	0.533777	0.439909	0.527595	0.488392	0.591032	0.4947	0.511148	0.468	0.493435	0.448307	0.464237	0.4448	0.464237	1.10105
[R].HLQDVTLK.[E]		Ttn-203; A0A0A0MTS7	9763	9770	107xx	49803052	50293180	44586680	34001512	26544122	26318948	39294096	42282532	41792456	31311722	27308594	41287256	41287256	0.515972	0.438634	0.500439	0.465941	0.583166	0.482708	0.491573	0.472104	0.454361	0.427586	0.436998	0.40918	0.436998	1.12489
[K].DIENQTVLK.[D]		Ttn-203; A0A0A0MTS7	9674	9682	106xx	39842632	38738004	35187448	30487856	23300606	22207638	32837652	34450996	36788432	28595844	25845534	36176152	34450996	0.41278	0.337855	0.394943	0.417792	0.511907	0.407303	0.410042	0.384662	0.399958	0.390498	0.413586	0.358526	0.390498	1.05005
[K].YEISIDGDR.[H]		Ttn-203	9716	9724	106xx	35434096	37487104	31841120	29441550	22800080	23000514	30641335	33494838	35196964	28138488	24750744	35727328	33494838	0.367106	0.326945	0.357383	0.403453	0.500911	0.421845	0.38528	0.373986	0.382656	0.384253	0.396067	0.354078	0.382656	1.00686
[R].GLLQAFELLK.[Q]		Ttn-203; A0A0A0MTS7	9618	9627	104xx	37457304	46863332	24789060	20897328	22383950	20182764	23586505	32612626	30962858	27714762	22809504	33889232	30962858	0.388067	0.408721	0.278231	0.286367	0.491769	0.370166	0.379117	0.364135	0.336623	0.378466	0.365003	0.335862	0.364135	1.04114
[K].HGEIESNVNLQVDER.[K]		Ttn-203	9546	9560	103xx	37292970	36396516	33552100	26198394	2.0059e+07	21639777	29875247	30606672	30327654	20491340	2.25611e+07	29683406	29683406	0.386365	0.317434	0.376587	0.359011	0.44069	0.396888	0.381476	0.341738	0.329717	0.279825	0.361027	0.29418	0.329717	1.15698
[K].DNDAIFEIDIK.[I]		Ttn-203	9683	9693	106xx	31527206	37181140	26440452	23204854	22260200	21427182	24822653	28834210	30340952	25039644	22578890	29449738	28834210	0.32663	0.324277	0.296767	0.317989	0.48905	0.392989	0.325453	0.321948	0.329862	0.341936	0.361312	0.291864	0.329862	0.986635
[R].STAELYLTTK.[E]		Ttn-203; A0A0A0MTS7	9930	9939	109xx	37026228	39868952	20236776	29632830	23200004	20425292	26416417	30003026	34236060	25956398	20594832	24980736	25956398	0.383601	0.347719	0.227137	0.406075	0.509697	0.374614	0.379108	0.334998	0.372209	0.354454	0.329563	0.247573	0.334998	1.13167
[K].GPTELTESQK.[Y]		Ttn-203; A0A0A0MTS7	9882	9891	108xx	33566228	31292980	30881306	19674128	16056445	1.60481e+07	25277717	24279968	26267850	19075634	16855787	25345102	24279968	0.347755	0.272923	0.346611	0.269605	0.352755	0.294333	0.320472	0.271097	0.28558	0.260492	0.26973	0.251185	0.26973	1.18812
[K].TDSGLYR.[C]		Ttn-203; A0A0A0MTS7	9533	9539	103xx	23292844	22484672	23035752	19339724	14257220	14561205	20912198	21335538	23130828	17965084	15838805	22731090	21335538	0.24132	0.196101	0.258552	0.265023	0.313227	0.267063	0.261788	0.238221	0.251475	0.245327	0.253456	0.225278	0.245327	1.0671
[R].LEIEELEK.[S]		Ttn-203	9637	9644	104xx	14300139	18921614	13505675	12634700	11735594	10970686	1.30702e+07	15683489	16416105	13565718	11882560	16141526	15683489	0.148153	0.165026	0.151587	0.17314	0.257827	0.20121	0.169083	0.175114	0.178473	0.18525	0.190147	0.159972	0.178473	0.947385
[R].LEIEELEK.[S]		Ttn-203	9637	9644	105xx	14300139	18921614	13505675	12634700	11735594	10970686	1.30702e+07	15683489	16416105	13565718	11882560	16141526	15683489	0.148153	0.165026	0.151587	0.17314	0.257827	0.20121	0.169083	0.175114	0.178473	0.18525	0.190147	0.159972	0.178473	0.947385
[R].AVPPEEIPPAVAPSIPLLLPLPEEK.[K]		Ttn-203	9964	9988	112xx	53943624	51387384	52370448	38284588	27986430	28993792	44835986	44248096	46501160	34686080	31373406	46463256	44248096	0.55887	0.448177	0.587804	0.524634	0.614853	0.531766	0.545318	0.494051	0.505553	0.473665	0.502044	0.460478	0.494051	1.10377
[K].IPVPVTK.[K]		Ttn-203	10369	10375	124xx	66290084	58456132	60022428	39340324	31354274	31035752	48898228	47662892	42699536	37115116	33988912	49953016	42699536	0.686782	0.509828	0.673689	0.539102	0.688844	0.569217	0.621453	0.532179	0.464223	0.506835	0.543898	0.495063	0.506835	1.22614
[K].KPVIEEKPAIPVVEK.[V]		Ttn-203	12566	12580	209xx	74797958	55932320	70397631	4.13856e+07	3.50042e+07	3.53523e+07	4.8659e+07	45286752	3.88229e+07	3.84729e+07	3.03388e+07	4.40967e+07	3.88229e+07	0.774926	0.487816	0.79014	0.567129	0.769032	0.648386	0.708709	0.505648	0.422077	0.525377	0.485488	0.437023	0.485488	1.45979
[K].KPVPVKPAQEPVPAKPK.[A]		Ttn-203	10790	10806	138xx	55000342	46445561	49905714	2.84356e+07	2.23796e+07	2.32815e+07	3.74406e+07	36320893	35405565	28977759	25079783	39959807	35405565	0.569818	0.405077	0.56014	0.389668	0.491674	0.426999	0.459336	0.40554	0.384924	0.395713	0.401332	0.396025	0.396025	1.15987
[K].KPVPEEKPPVPVPK.[K]		Ttn-203	11039	11052	145xx	53489202	3.59884e+07	55054929	31156225	2.12942e+07	22182011	3.35723e+07	30348173	3.45605e+07	2.41029e+07	2.22881e+07	33449147	30348173	0.554162	0.313875	0.617934	0.426951	0.467828	0.406833	0.447389	0.338852	0.375736	0.329143	0.356659	0.3315	0.338852	1.32031
[K].KPVPEEVVPVPIPK.[K]		Ttn-203	10305	10318	121xx	48472094	31492233	41796784	31562284	22546640	23147011	3.15273e+07	24859436	29899445	20583450	22307747	31426572	24859436	0.502183	0.274661	0.469125	0.432515	0.495343	0.424532	0.45082	0.277567	0.325062	0.281083	0.356973	0.311455	0.311455	1.44746
[K].ASEIIDVSSK.[A]		Ttn-203	10037	10046	115xx	31358806	26352674	30655920	20958826	17171750	17195964	23655750	25137308	22799308	20046730	17169196	24413104	22799308	0.324885	0.229836	0.344081	0.28721	0.377258	0.315386	0.320136	0.28067	0.24787	0.273753	0.274745	0.241948	0.273753	1.16943
[K].KKEPAAPPQVPEAPK.[K]		Ttn-203	10347	10361	122xx	41180440	24973119	38034321	22866608	1.75841e+07	1.76445e+07	2.39199e+07	2.25694e+07	27864898	17430862	1.74873e+07	2.76989e+07	2.25694e+07	0.42664	0.217804	0.426896	0.313353	0.386318	0.323613	0.354966	0.251998	0.302943	0.238032	0.279835	0.274512	0.274512	1.29308
[K].KKEPAAPPQVPEAPK.[K]		Ttn-203	10347	10361	124xx	41180440	24973119	38034321	22866608	1.75841e+07	1.76445e+07	2.39199e+07	2.25694e+07	27864898	17430862	1.74873e+07	2.76989e+07	2.25694e+07	0.42664	0.217804	0.426896	0.313353	0.386318	0.323613	0.354966	0.251998	0.302943	0.238032	0.279835	0.274512	0.274512	1.29308
[K].VSIEVPK.[R]		Ttn-203	10703	10709	136xx	45855380	26551982	42902204	27549676	19743206	20914604	27050829	24712240	22343990	20840774	16633898	23523258	22343990	0.475073	0.231574	0.481533	0.377528	0.433752	0.383588	0.40867	0.275924	0.24292	0.284597	0.266179	0.233129	0.266179	1.53532
[R].EEGYDEGEEEWEEIYHER.[E]		Ttn-203	10142	10159	115xx	22992852	29614366	17987718	17369492	15137044	14784441	17678605	21412736	20420874	17063012	14335358	20946382	20420874	0.238212	0.258283	0.201893	0.238024	0.332556	0.271157	0.248247	0.239083	0.222012	0.233008	0.229398	0.207591	0.229398	1.08217
[R].TPVQEEIIEVK.[V]		Ttn-203	10232	10242	118xx	56692912	21953096	48996976	22401864	18593158	21517800	22177480	32930350	14239445	17540064	14703246	36358168	17540064	0.587353	0.191465	0.54994	0.306985	0.408486	0.394651	0.401569	0.367683	0.154809	0.239523	0.235285	0.36033	0.239523	1.67653
[K].LIVEELPVR.[F]		Ttn-203	13119	13127	225xx	98288752	120237264	90707536	86378336	67320920	64784788	88542936	96637512	112628992	83415152	80283496	108521536	96637512	1.0183	1.04865	1.0181	1.18369	1.47902	1.1882	1.11617	1.079	1.22448	1.1391	1.28471	1.07551	1.1391	0.979873
[K].LRPGSGGEKPPDEAPFTYQLK.[A]		Ttn-203; A0A0A0MTS7	13005	13025	225xx	74463792	88114514	52879148	57268788	46737711	42213894	55073968	61740234	66493166	57649816	53169665	65311466	61740234	0.771464	0.768495	0.593513	0.784785	1.02681	0.774232	0.772848	0.689359	0.722903	0.787252	0.850833	0.647274	0.722903	1.06909
[K].AVEVEAPPEPTPK.[E]		Ttn-203	12900	12912	221xx	61586780	59441284	57889552	44514308	34023000	34468800	51201930	53677792	53752084	39966784	39093040	55041692	53677792	0.638055	0.51842	0.64975	0.610004	0.747475	0.632182	0.635118	0.599338	0.584384	0.545777	0.625575	0.545495	0.584384	1.08682
[K].APPIEPAPTPIAAPVTAPVVGK.[K]		Ttn-203	12949	12970	223xx	67488392	49049516	65632268	37880960	28014400	32550846	43465238	44578896	39682140	29382566	30271830	43716428	39682140	0.699197	0.427787	0.736654	0.519103	0.615468	0.597005	0.606236	0.497744	0.431418	0.401241	0.484416	0.433255	0.433255	1.39926
[K].KTPSPIEAER.[RK]		Ttn-203; A0A0A0MTS7	12993	13002	225xx	37252538	4.28827e+07	31266768	33406752	24663727	25169830	32336760	39129946	41637438	31117190	29125698	41538388	39129946	0.385946	0.374003	0.350937	0.457791	0.541855	0.461632	0.421868	0.436904	0.452676	0.424929	0.466076	0.411669	0.436904	0.965585
[K].KVPEKPEVVEK.[V]		Ttn-203	12823	12833	218xx	25948316	25690164	22775934	16809910	13834571	13115772	19792922	21978806	21708860	17100204	14938511	21851826	21708860	0.268831	0.224058	0.255636	0.230355	0.303941	0.240552	0.248094	0.245404	0.236015	0.233516	0.239049	0.216564	0.236015	1.05118
[K].LIVEELPVR.[F]		Ttn-203	13119	13127	226xx	98288752	120237264	90707536	86378336	67320920	64784788	88542936	96637512	112628992	83415152	80283496	108521536	96637512	1.0183	1.04865	1.0181	1.18369	1.47902	1.1882	1.11617	1.079	1.22448	1.1391	1.28471	1.07551	1.1391	0.979873
[R].FECVLTR.[E]	1xCarbamidomethyl [C3]	Ttn-203; A0A0A0MTS7	13419	13425	230xx	60817576	90086184	61399448	89875504	67221424	66598328	66909876	95161800	100491552	73537232	73433160	97713768	95161800	0.630086	0.785691	0.689145	1.23161	1.47683	1.22146	1.00357	1.06253	1.09253	1.00421	1.17509	0.9684	1.06253	0.944518
[R].EVELLKPIEDVTIYEK.[E]		Ttn-203; A0A0A0MTS7	13310	13325	228xx	73737006	113054164	63842372	71938236	56171952	52082963	67890304	84267930	99051870	73050706	67649200	92032446	84267930	0.763934	0.986007	0.716564	0.985808	1.23408	0.955238	0.970523	0.940891	1.07688	0.997563	1.08254	0.912094	0.997563	0.972894
[K].TGVEKDEIILK.[C]		Ttn-203	13587	13597	232xx	69003678	90548560	67003158	63120024	48747496	45673170	65061591	74732660	80650562	60374516	55514326	79488120	74732660	0.714896	0.789723	0.752041	0.864968	1.07097	0.837678	0.8137	0.834425	0.87682	0.82446	0.888352	0.787773	0.834425	0.975162
[K].LLIEGLR.[L]		Ttn-203; A0A0A0MTS7	13836	13842	235xx	64179160	90884872	56706056	63217300	51091268	47399168	59961678	74637144	83605592	64126788	59992552	81169872	74637144	0.664913	0.792656	0.636467	0.866301	1.12246	0.869334	0.829479	0.833359	0.908947	0.8757	0.960014	0.80444	0.8757	0.947217
[K].LLIEGLR.[L]		Ttn-203; A0A0A0MTS7	13836	13842	236xx	64179160	90884872	56706056	63217300	51091268	47399168	59961678	74637144	83605592	64126788	59992552	81169872	74637144	0.664913	0.792656	0.636467	0.866301	1.12246	0.869334	0.829479	0.833359	0.908947	0.8757	0.960014	0.80444	0.8757	0.947217
[K].VLEADPYFTVK.[L]		Ttn-203; A0A0A0MTS7	13572	13582	231xx	64082244	86450560	47635704	63283424	47522180	45149076	55459564	69129800	79961440	59609252	54797716	69941440	69129800	0.663908	0.753982	0.534661	0.867207	1.04405	0.828065	0.791024	0.771867	0.869328	0.81401	0.876885	0.69316	0.81401	0.971762
[K].VLEADPYFTVK.[L]		Ttn-203; A0A0A0MTS7	13572	13582	232xx	64082244	86450560	47635704	63283424	47522180	45149076	55459564	69129800	79961440	59609252	54797716	69941440	69129800	0.663908	0.753982	0.534661	0.867207	1.04405	0.828065	0.791024	0.771867	0.869328	0.81401	0.876885	0.69316	0.81401	0.971762
[K].LTVLEGDPYFTGK.[L]		Ttn-203; A0A0A0MTS7	13925	13937	236xx	66251820	86278664	60242404	59066384	45801148	44271496	59654394	69078880	78748176	57901912	54097240	73606480	69078880	0.686386	0.752483	0.676158	0.809418	1.00624	0.81197	0.780951	0.771298	0.856138	0.790695	0.865676	0.729483	0.790695	0.987676
[K].LTVLEGDPYFTGK.[L]		Ttn-203; A0A0A0MTS7	13925	13937	237xx	66251820	86278664	60242404	59066384	45801148	44271496	59654394	69078880	78748176	57901912	54097240	73606480	69078880	0.686386	0.752483	0.676158	0.809418	1.00624	0.81197	0.780951	0.771298	0.856138	0.790695	0.865676	0.729483	0.790695	0.987676
[K].FISPLEDQTVK.[E]		Ttn-203	13490	13500	231xx	72365776	83040416	62318752	59865128	47294284	46569148	61091940	68242256	78783640	61301548	52987916	75732296	68242256	0.749728	0.724241	0.699463	0.820364	1.03904	0.85411	0.785046	0.761957	0.856523	0.83712	0.847924	0.750551	0.83712	0.937794
[R].ETTLDDISQIK.[A]		Ttn-203	13548	13558	231xx	67192112	79597032	58605156	56414728	46238460	44596104	57509942	67677888	75237392	57524440	53100232	75986888	67677888	0.696127	0.694209	0.657782	0.773081	1.01584	0.817923	0.734604	0.755656	0.817969	0.78554	0.849722	0.753074	0.78554	0.935158
[K].DLSIDDTSQIR.[V]		Ttn-203; A0A0A0MTS7	13903	13913	236xx	51417792	69429720	49974800	54258496	41380480	41779000	50696296	61622724	69292504	51547688	50255020	66252860	61622724	0.532701	0.605534	0.560915	0.743533	0.909116	0.766256	0.674534	0.688047	0.753337	0.703923	0.804192	0.656604	0.703923	0.958249
[K].IVVEKPGR.[I]		Ttn-203; A0A0A0MTS7	13164	13171	226xx	60208624	72471282	58882202	49925604	39817080	36530744	54403903	61237074	6.816e+07	50036454	47219132	67797852	61237074	0.623777	0.632061	0.660892	0.684157	0.874769	0.669999	0.665445	0.683741	0.741025	0.683286	0.755611	0.671916	0.683741	0.973242
[R].FEIELSEPDVHGQWK.[L]		Ttn-203	13684	13698	233xx	52861533	86449196	39087072	45757890	33289111	32699527	42422481	59296319	61480570	43766098	36819757	58388398	58388398	0.547659	0.75397	0.438712	0.627045	0.731352	0.599732	0.613388	0.662071	0.668407	0.59766	0.589198	0.578663	0.59766	1.02632
[K].ELPLIFITPLSDVK.[V]		Ttn-203; A0A0A0MTS7	13751	13764	235xx	57263212	111304152	27977226	62506804	44862068	42943116	51062640	62937524	82761152	51972368	51086788	58240540	58240540	0.593262	0.970744	0.314015	0.856564	0.985606	0.787606	0.822085	0.702727	0.899766	0.709722	0.817502	0.577197	0.709722	1.15832
[K].EGQTATFVCELSHEK.[M]	1xCarbamidomethyl [C9]	Ttn-203	13501	13515	231xx	56090782	73501936	37986163	45702669	36576008	33827434	41844416	55953008	59589437	45488774	40116407	55827828	55827828	0.581115	0.64105	0.426355	0.626288	0.803564	0.620419	0.623353	0.624742	0.647847	0.621184	0.641952	0.553286	0.624742	0.997778
[K].LKGEALLQTPECEIKEEGK.[I]	1xCarbamidomethyl [C12]	Ttn-203	14055	14073	238xx	52491570	60247816	49476996	42236046	31409651	30600415	45856521	49595306	58891114	43528858	38587427	56507912	49595306	0.543826	0.525454	0.555328	0.578783	0.69006	0.561233	0.55828	0.553755	0.640255	0.59442	0.617484	0.560026	0.59442	0.939202
[K].LKGEALLQTPECEIKEEGK.[I]	1xCarbamidomethyl [C12]	Ttn-203	14055	14073	239xx	52491570	60247816	49476996	42236046	31409651	30600415	45856521	49595306	58891114	43528858	38587427	56507912	49595306	0.543826	0.525454	0.555328	0.578783	0.69006	0.561233	0.55828	0.553755	0.640255	0.59442	0.617484	0.560026	0.59442	0.939202
[R].LDQTGGVDFQAANVK.[S]		Ttn-203; A0A0A0MTS7	14084	14098	239xx	49193448	56820152	45768092	42937664	34532088	31437534	44352878	49324628	55096892	39961748	38351940	53517140	49324628	0.509657	0.495559	0.513699	0.588398	0.758659	0.576586	0.545143	0.550733	0.599005	0.545708	0.613716	0.530386	0.550733	0.98985
[R].FETEISEDDIHANWK.[L]		Ttn-203; A0A0A0MTS7	14040	14054	238xx	52381429	65047338	42601520	37761411	30161272	33182048	4.01815e+07	50147696	48868096	39943914	3.16462e+07	50102066	48868096	0.542685	0.567313	0.478158	0.517465	0.662634	0.608582	0.554999	0.559923	0.531286	0.545465	0.50641	0.49654	0.531286	1.04463
[K].TSAQLFVTGIR.[L]		Ttn-203	13477	13487	230xx	38571116	63648524	28852580	43185676	34479072	33271030	36525094	47784692	54175400	42401464	39412248	47377984	47377984	0.399607	0.555113	0.32384	0.591797	0.757495	0.610214	0.573455	0.533539	0.588986	0.579024	0.630683	0.469543	0.579024	0.990381
[K].TSAQLFVTGIR.[L]		Ttn-203	13477	13487	231xx	38571116	63648524	28852580	43185676	34479072	33271030	36525094	47784692	54175400	42401464	39412248	47377984	47377984	0.399607	0.555113	0.32384	0.591797	0.757495	0.610214	0.573455	0.533539	0.588986	0.579024	0.630683	0.469543	0.579024	0.990381
[K].GTAVFTCDIAK.[D]	1xCarbamidomethyl [C7]	Ttn-203	13235	13245	227xx	53251568	59256808	42467356	37651368	30194840	28550368	40059362	45045180	47805736	39085452	34919392	48643096	45045180	0.5517	0.516811	0.476652	0.515957	0.663371	0.523633	0.520222	0.502951	0.519736	0.533742	0.558788	0.482081	0.519736	1.00093
[K].LQDYTGVEKDEVILQCEISK.[A]	1xCarbamidomethyl [C16]	Ttn-203; A0A0A0MTS7	13938	13957	237xx	48493079	61682442	38684907	35744928	3.25131e+07	29145495	3.72149e+07	43189680	4.95736e+07	40429466	3.62861e+07	47670913	43189680	0.502401	0.537966	0.434198	0.489832	0.714302	0.534549	0.518475	0.482233	0.538956	0.552095	0.580658	0.472446	0.538956	0.961997
[K].ASDKFDIIADGK.[K]		Ttn-203	13440	13451	230xx	32830493	53578636	2.97028e+07	33779107	26779889	26375970	3.12666e+07	41623612	43458792	33786001	31889372	41543946	41543946	0.340132	0.467288	0.333383	0.462893	0.588346	0.483754	0.465091	0.464747	0.472477	0.461374	0.510301	0.411724	0.464747	1.00074
[K].NLSSTANLK.[V]		Ttn-203	13563	13571	231xx	38099552	44041948	37056100	34607528	27596658	26713998	35831814	40681724	44386000	34738592	31913490	44960476	40681724	0.394721	0.384114	0.415916	0.474246	0.60629	0.489953	0.445081	0.454231	0.482558	0.474382	0.510687	0.445584	0.474382	0.938233
[K].LKGEPLTASPDCEIIEDGKK.[H]	1xCarbamidomethyl [C12]	Ttn-203	13699	13718	233xx	33957854	49312332	29609822	30732079	24221935	23910074	3.0171e+07	40007755	44779034	31750608	30702874	43410491	40007755	0.351812	0.43008	0.332339	0.421138	0.532148	0.438527	0.425609	0.446705	0.486831	0.433579	0.491314	0.430223	0.446705	0.952773
[K].LKGEPLTASPDCEIIEDGKK.[H]	1xCarbamidomethyl [C12]	Ttn-203	13699	13718	234xx	33957854	49312332	29609822	30732079	24221935	23910074	3.0171e+07	40007755	44779034	31750608	30702874	43410491	40007755	0.351812	0.43008	0.332339	0.421138	0.532148	0.438527	0.425609	0.446705	0.486831	0.433579	0.491314	0.430223	0.446705	0.952773
[K].DGEEIVPSPK.[YH]		Ttn-203; A0A0A0MTS7	13611	13620	232xx	33735444	42753528	33888180	33291048	24842912	25949636	33513246	39038880	41467364	33535246	30704918	41150492	39038880	0.349508	0.372877	0.38036	0.456205	0.545791	0.475934	0.418282	0.435888	0.450827	0.457949	0.491347	0.407825	0.450827	0.927812
[K].EIELDFAVPLK.[D]		Ttn-203; A0A0A0MTS7	13397	13407	230xx	26569926	56333260	19022842	31677414	27823048	24533316	27196487	38803200	42597532	35004324	32288680	38022144	38022144	0.275271	0.491313	0.213512	0.434093	0.611264	0.449958	0.442025	0.433256	0.463114	0.478011	0.516691	0.376821	0.463114	0.954464
[K].ANVTVEAR.[L]		Ttn-203; A0A0A0MTS7	13656	13663	232xx	30228282	42283284	31341992	31158402	24226662	23223258	30693342	37695832	41438312	31339388	29887628	41376864	37695832	0.313173	0.368775	0.351781	0.42698	0.532252	0.425931	0.397353	0.420892	0.450511	0.427963	0.478268	0.410069	0.427963	0.928475
[K].ANVTVEAR.[L]		Ttn-203; A0A0A0MTS7	13656	13663	233xx	30228282	42283284	31341992	31158402	24226662	23223258	30693342	37695832	41438312	31339388	29887628	41376864	37695832	0.313173	0.368775	0.351781	0.42698	0.532252	0.425931	0.397353	0.420892	0.450511	0.427963	0.478268	0.410069	0.427963	0.928475
[R].EANVIWSK.[G]		Ttn-203; A0A0A0MTS7	13426	13433	230xx	26936708	44096328	25978434	30986186	22538514	20326470	26457571	36835712	40976712	31770924	29127816	39627264	36835712	0.279071	0.384588	0.291581	0.42462	0.495164	0.372802	0.378695	0.411288	0.445492	0.433856	0.46611	0.392729	0.433856	0.872858
[K].ESASFDAEISEEDIPGEWK.[L]		Ttn-203	13326	13344	228xx	29011624	46126828	23887734	29355240	22306958	20803706	26449679	34835876	38063040	26537708	28082076	34520200	34520200	0.300568	0.402297	0.268115	0.402271	0.490077	0.381554	0.391913	0.388959	0.413815	0.362393	0.449376	0.342115	0.388959	1.00759
[K].FECEVSR.[E]	1xCarbamidomethyl [C3]	Ttn-203; A0A0A0MTS7	13773	13779	235xx	25391320	34412864	23486094	26132956	21154580	20145146	24438707	29812640	34262196	25877038	23872830	31817060	29812640	0.263061	0.300133	0.263607	0.358114	0.46476	0.369476	0.329124	0.332872	0.372493	0.353371	0.382018	0.315325	0.353371	0.931383
[K].GELLRPSPTCEIK.[A]	1xCarbamidomethyl [C10]	Ttn-203; A0A0A0MTS7	13347	13359	228xx	25026461	40533931	19892877	2.26434e+07	1.66475e+07	14510759	2.12681e+07	2.75633e+07	29767040	2.06231e+07	20511134	27474260	27474260	0.259281	0.353518	0.223277	0.310295	0.36574	0.266137	0.288216	0.307758	0.323623	0.281624	0.328224	0.272286	0.307758	0.936503
[K].GELLRPSPTCEIK.[A]	1xCarbamidomethyl [C10]	Ttn-203; A0A0A0MTS7	13347	13359	229xx	25026461	40533931	19892877	2.26434e+07	1.66475e+07	14510759	2.12681e+07	2.75633e+07	29767040	2.06231e+07	20511134	27474260	27474260	0.259281	0.353518	0.223277	0.310295	0.36574	0.266137	0.288216	0.307758	0.323623	0.281624	0.328224	0.272286	0.307758	0.936503
[R].EWLVKPIR.[D]		Ttn-203	13220	13227	227xx	28342706	41588431	26128687	24407662	19889179	1.68587e+07	2.52682e+07	27116367	33152799	24353359	23175123	33905652	27116367	0.293638	0.362715	0.293267	0.334471	0.436959	0.3092	0.321835	0.302767	0.360432	0.332564	0.370853	0.336025	0.336025	0.957774
[R].VIGLLRPLK.[D]		Ttn-203; A0A0A0MTS7	14109	14117	240xx	21974740	29519424	20227896	20659550	17538664	19401698	20443723	27000062	26559414	25990238	20874452	29265266	26559414	0.227664	0.257455	0.227037	0.283109	0.385319	0.355841	0.270282	0.301468	0.28875	0.354917	0.334038	0.290036	0.301468	0.896551
[K].VEKPLYGVEVFVGETAR.[F]		Ttn-203	13667	13683	233xx	23383528	40903246	1.25069e+07	2.108e+07	20862362	19691720	2.09712e+07	2.59476e+07	2.84253e+07	2.20388e+07	2.07619e+07	2.56242e+07	2.56242e+07	0.242259	0.356739	0.140377	0.288871	0.45834	0.36116	0.322805	0.289717	0.309035	0.300957	0.332237	0.253951	0.300957	1.07259
[K].SAAFEDEAK.[Y]		Ttn-203; A0A0A0MTS7	13814	13822	235xx	20647468	27499988	19230080	20799694	16363346	15465653	19938774	24796996	26087896	20709200	18225006	24950746	24796996	0.213913	0.239842	0.215838	0.285029	0.359498	0.283651	0.261747	0.27687	0.283623	0.2828	0.291641	0.247276	0.2828	0.925554
[K].DKGEYVCDCGTDTTK.[A]	2xCarbamidomethyl [C7; C9]	Ttn-203	13641	13655	232xx	1.50735e+07	21201298	13876819	14360288	1.15884e+07	1.05853e+07	1.41186e+07	1.68315e+07	1.97444e+07	1.52748e+07	13248053	1.85401e+07	1.68315e+07	0.156166	0.184908	0.155753	0.196787	0.254594	0.194142	0.189525	0.187932	0.214658	0.208589	0.211998	0.183743	0.208589	0.908603
[K].SDIGQYTCDCGTDQTSGK.[L]	2xCarbamidomethyl [C8; C10]	Ttn-203	13996	14013	237xx	15856149	20340234	13240676	14317257	11643793	10403134	1.3779e+07	16694869	17635200	13092360	12677647	17942818	16694869	0.164274	0.177398	0.148613	0.196197	0.255811	0.190801	0.184099	0.186406	0.191727	0.178786	0.20287	0.177824	0.186406	0.987626
[K].YGVGEGLK.[S]		Ttn-203; A0A0A0MTS7	22070	22077	320xx	95357456	119957816	128131240	159603200	118653624	108461200	119305720	152740752	197753120	152022144	152090192	202892784	152740752	0.987928	1.04622	1.43814	2.18713	2.60678	1.98925	1.7137	1.70542	2.14994	2.07598	2.43378	2.01078	2.07598	0.825489
[R].VTAENEYGIGLPAR.[T]		Ttn-203	25021	25034	326xx	131124168	162126244	126772952	113812528	118242004	118650992	122711972	144724928	153077232	115726288	125139456	159021832	144724928	1.35848	1.41399	1.42289	1.55963	2.59774	2.17614	1.49126	1.61592	1.66423	1.58033	2.00251	1.576	1.61592	0.922857
[K].TPILAINPIDRPGEPENLHIADK.[G]		Ttn-203; A0A0A0MTS7	20004	20026	304xx	151405065	183232052	1.26004e+08	115544238	81896162	7.88028e+07	1.20774e+08	1.34158e+08	148835563	1.01564e+08	9.23405e+07	1.45422e+08	1.34158e+08	1.5686	1.59807	1.41426	1.58336	1.79923	1.4453	1.57598	1.49793	1.61812	1.38693	1.47765	1.44121	1.47765	1.06654
[R].VEVFDVPGPVLDLKPVVTNR.[K]		Ttn-203; A0A0A0MTS7	17105	17124	277xx	139773216	164167896	115899288	116020556	88418971	87385711	115959922	132255977	154468708	107931524	107383089	150658098	132255977	1.44809	1.4318	1.30085	1.58989	1.94254	1.60271	1.51899	1.4767	1.67936	1.47389	1.71837	1.49311	1.49311	1.01733
[R].VEVFDVPGPVLDLKPVVTNR.[K]		Ttn-203; A0A0A0MTS7	17105	17124	278xx	139773216	164167896	115899288	116020556	88418971	87385711	115959922	132255977	154468708	107931524	107383089	150658098	132255977	1.44809	1.4318	1.30085	1.58989	1.94254	1.60271	1.51899	1.4767	1.67936	1.47389	1.71837	1.49311	1.49311	1.01733
[R].LTTGVEYQFR.[V]		Ttn-203	23137	23146	326xx	137555632	138199408	150308912	106140248	81305408	87833784	121847940	130256240	145456752	120252096	107403840	151649680	130256240	1.42511	1.20531	1.68706	1.4545	1.78625	1.61093	1.53271	1.45437	1.58138	1.64213	1.7187	1.50294	1.58138	0.969224
[K].TVELDVADVPDPPR.[G]		Ttn-203; A0A0A0MTS7	33027	33040	358xx	67712712	135299663	62725764	59446564	45848724	45737956	61086164	126903160	140636332	105715966	62264572	133469856	126903160	0.701521	1.18002	0.704032	0.814628	1.00728	0.838866	0.826747	1.41693	1.52898	1.44363	0.996371	1.32276	1.41693	0.583476
[K].LEAPELDLDSELRK.[G]		Ttn-203; A0A0A0MTS7	25933	25946	326xx	115633889	150130354	92277846	97205483	81699020	81968243	9.47417e+07	125676970	128571520	95271879	99216520	129916008	125676970	1.198	1.30937	1.03572	1.33206	1.7949	1.50335	1.32071	1.40324	1.39781	1.30101	1.58768	1.28754	1.39781	0.944846
[K].VLDRPGPPEGPVQVTGVTAEK.[C]		Ttn-203	25629	25649	326xx	107903965	131748629	102852522	100650826	80954776	78261433	101751674	113184483	129542000	101231359	96035841	129526282	113184483	1.11791	1.14905	1.15441	1.37927	1.77855	1.43537	1.26684	1.26376	1.40836	1.38239	1.53679	1.28368	1.38239	0.916414
[R].SLAVPIIAK.[D]		Ttn-203	25130	25138	326xx	109823320	131428624	106945970	98146548	77029344	72572262	102546259	112187712	125223058	91685148	90089974	124523048	112187712	1.1378	1.14626	1.20036	1.34496	1.69231	1.33103	1.26569	1.25263	1.36141	1.25203	1.44164	1.2341	1.25263	1.01043
[R].IEIPDLELADDLKK.[T]		Ttn-203; A0A0A0MTS7	31355	31368	345xx	103989570	134483378	93249258	94016796	72979044	69988960	93633027	110801696	125133218	94106302	87543652	123677046	110801696	1.07736	1.1729	1.04663	1.28836	1.60333	1.28365	1.22827	1.23715	1.36043	1.28509	1.40089	1.22571	1.28509	0.955786
[R].IEIPDLELADDLKK.[T]		Ttn-203; A0A0A0MTS7	31355	31368	346xx	103989570	134483378	93249258	94016796	72979044	69988960	93633027	110801696	125133218	94106302	87543652	123677046	110801696	1.07736	1.1729	1.04663	1.28836	1.60333	1.28365	1.22827	1.23715	1.36043	1.28509	1.40089	1.22571	1.28509	0.955786
[K].QGESQLR.[I]		Ttn-203	16675	16681	273xx	95959592	113264440	95145304	79895544	66458060	68616720	87520424	105125712	115375800	86978088	81499904	107171744	105125712	0.994166	0.987841	1.06791	1.09485	1.46006	1.25848	1.08138	1.17378	1.25435	1.18775	1.30418	1.06213	1.18775	0.910442
[K].VLDRPGPPEGPLAVSDVTSEK.[C]		Ttn-203	23465	23485	326xx	76899095	129600860	70872274	86279394	63769753	60829282	7.38857e+07	102124168	115279134	84240822	80325815	107987858	102124168	0.796694	1.13032	0.795468	1.18233	1.401	1.11565	1.12299	1.14026	1.2533	1.15037	1.28539	1.07022	1.15037	0.976192
[K].VIILDKPGPPTGPIK.[I]		Ttn-203; A0A0A0MTS7	31740	31754	348xx	102066930	131065980	89071262	81973772	67778664	64111758	85522517	101374798	117950970	85763980	80901592	118704354	101374798	1.05744	1.1431	0.999732	1.12333	1.48908	1.17585	1.13321	1.1319	1.28234	1.17117	1.29461	1.17643	1.17643	0.963267
[K].VIILDKPGPPTGPIK.[I]		Ttn-203; A0A0A0MTS7	31740	31754	349xx	102066930	131065980	89071262	81973772	67778664	64111758	85522517	101374798	117950970	85763980	80901592	118704354	101374798	1.05744	1.1431	0.999732	1.12333	1.48908	1.17585	1.13321	1.1319	1.28234	1.17117	1.29461	1.17643	1.17643	0.963267
[K].LNIPVPFR.[A]		Ttn-203	16318	16325	270xx	93622312	124555576	83300840	91951216	73070840	67821112	87626028	99691520	119360352	88186456	87442112	114030480	99691520	0.969951	1.08632	0.934965	1.26006	1.60534	1.24389	1.1651	1.1131	1.29767	1.20425	1.39927	1.13011	1.20425	0.967488
[K].VLVLDKPGPPR.[D]		Ttn-203; A0A0A0MTS7	19218	19228	301xx	104390518	122893416	95565344	82702878	65758344	63594090	89134111	99145878	112182164	82915982	79390820	115374386	99145878	1.08151	1.07182	1.07262	1.13332	1.44469	1.16636	1.10742	1.10701	1.21963	1.13228	1.27043	1.14343	1.14343	0.968508
[K].VLVLDKPGPPR.[D]		Ttn-203; A0A0A0MTS7	19218	19228	302xx	104390518	122893416	95565344	82702878	65758344	63594090	89134111	99145878	112182164	82915982	79390820	115374386	99145878	1.08151	1.07182	1.07262	1.13332	1.44469	1.16636	1.10742	1.10701	1.21963	1.13228	1.27043	1.14343	1.14343	0.968508
[RK].DDVVAPDLDLK.[GD]		Ttn-203; A0A0A0MTS7	21889	21899	319xx	8.95222e+07	124565397	72321758	8.01213e+07	7.24122e+07	6.9349e+07	7.62667e+07	98529064	107494960	82588233	83106602	99907055	98529064	0.927473	1.0864	0.811737	1.09794	1.59087	1.27191	1.09217	1.10012	1.16867	1.12781	1.32989	0.990136	1.12781	0.968406
[RK].DDVVAPDLDLK.[GD]		Ttn-203; A0A0A0MTS7	21889	21899	320xx	8.95222e+07	124565397	72321758	8.01213e+07	7.24122e+07	6.9349e+07	7.62667e+07	98529064	107494960	82588233	83106602	99907055	98529064	0.927473	1.0864	0.811737	1.09794	1.59087	1.27191	1.09217	1.10012	1.16867	1.12781	1.32989	0.990136	1.12781	0.968406
[K].NPFVLPGPPK.[S]		Ttn-203; A0A0A0MTS7	25728	25737	326xx	107419791	127815894	93529052	86007696	65492996	65080928	89768374	98323516	114918182	75650521	76389774	111857864	98323516	1.1129	1.11475	1.04977	1.17861	1.43886	1.19363	1.14668	1.09783	1.24937	1.03307	1.22241	1.10858	1.10858	1.03437
[R].LLERPPEFTLPLYNK.[T]		Ttn-203; A0A0A0MTS7	33598	33612	358xx	93676486	124483202	74090739	81616587	67227008	63305458	77853663	97185504	112682308	85022349	81407865	105658852	97185504	0.970512	1.08569	0.831592	1.11844	1.47696	1.16107	1.10206	1.08512	1.22506	1.16105	1.30271	1.04714	1.16105	0.949197
[K].VLDRPGPPEGPLK.[V]		Ttn-203; A0A0A0MTS7	26712	26724	326xx	98874466	121049124	91682784	81550146	63329916	62752548	86616465	96572934	107345570	80208562	77128472	109540434	96572934	1.02436	1.05574	1.02904	1.11753	1.39134	1.15093	1.08663	1.07828	1.16704	1.09531	1.23423	1.08561	1.09531	0.992076
[K].ADTLLKPDQR.[I]		Ttn-203	15641	15650	261xx	107717606	103700384	106336188	85307214	63522374	68097800	94503799	95958432	99720316	76864366	71421744	101294066	95958432	1.11598	0.904427	1.19351	1.16901	1.39557	1.24896	1.18126	1.07142	1.08414	1.04964	1.14291	1.00388	1.07142	1.10252
[R].VDLIHDLPR.[V]		Ttn-203	19869	19877	304xx	95178052	113469128	80152212	76750476	56967420	56980350	78451344	92720612	99225266	70273524	66061066	100720592	92720612	0.986069	0.989626	0.899625	1.05175	1.25156	1.04506	1.01734	1.03527	1.07876	0.959639	1.05712	0.998199	1.03527	0.982684
[R].VLDTPGPVLNLRPTDITK.[D]		Ttn-203; A0A0A0MTS7	22778	22795	326xx	95596582	111514412	95063740	80899860	59571054	59171281	87981800	92595776	107455938	78706421	73977479	106556732	92595776	0.990405	0.972578	1.06699	1.10861	1.30876	1.08524	1.07612	1.03388	1.16824	1.0748	1.1838	1.05604	1.0748	1.00123
[K].LVPPSVELDVK.[L]		Ttn-203; A0A0A0MTS7	19419	19429	303xx	93947680	113151000	84854336	81566592	63404500	60055888	83210464	92412792	105879224	80948760	75089504	107472304	92412792	0.973322	0.986851	0.952402	1.11775	1.39298	1.10147	1.04416	1.03183	1.1511	1.10542	1.2016	1.06511	1.10542	0.944583
[K].LVPPSVELDVK.[L]		Ttn-203; A0A0A0MTS7	19419	19429	304xx	93947680	113151000	84854336	81566592	63404500	60055888	83210464	92412792	105879224	80948760	75089504	107472304	92412792	0.973322	0.986851	0.952402	1.11775	1.39298	1.10147	1.04416	1.03183	1.1511	1.10542	1.2016	1.06511	1.10542	0.944583
[KS].LVVTGLK.[E]		Ttn-203; A0A0A0MTS7	18394	18400	293xx	87637352	110028174	80383958	77978646	63710625	59557158	79181302	91893070	99307614	80130450	73897127	103598546	91893070	0.907945	0.959615	0.902226	1.06858	1.3997	1.09232	1.0141	1.02603	1.07966	1.09424	1.18252	1.02672	1.07966	0.93928
[K].ALDPLHPPGPPK.[D]		Ttn-203; A0A0A0MTS7	19317	19328	302xx	100232518	121168008	88332476	76392716	5.62259e+07	54660415	82362596	91668488	99204048	69306115	66887408	101356452	91668488	1.03843	1.05677	0.99144	1.04685	1.23527	1.00251	1.04264	1.02352	1.07853	0.946428	1.07035	1.0045	1.02352	1.01868
[K].ALDPLHPPGPPK.[D]		Ttn-203; A0A0A0MTS7	19317	19328	303xx	100232518	121168008	88332476	76392716	5.62259e+07	54660415	82362596	91668488	99204048	69306115	66887408	101356452	91668488	1.03843	1.05677	0.99144	1.04685	1.23527	1.00251	1.04264	1.02352	1.07853	0.946428	1.07035	1.0045	1.02352	1.01868
[R].EIVTPVTVQDLR.[V]		Ttn-203	31636	31647	347xx	86630440	105766632	86048208	79831328	61275872	58615644	82939768	90827496	102065136	77737312	75662880	100552600	90827496	0.897514	0.922448	0.965802	1.09397	1.34621	1.07505	1.02043	1.01413	1.10964	1.06156	1.21077	0.996534	1.06156	0.96125
[R].ELLLPVLIK.[ED]		Ttn-203; A0A0A0MTS7	28374	28382	327xx	91228792	122781560	78778736	78953216	65119416	60178604	78865976	90737848	109280912	82248520	79762976	104550280	90737848	0.945154	1.07084	0.884209	1.08194	1.43065	1.10372	1.07639	1.01313	1.18808	1.12317	1.27638	1.03615	1.12317	0.958354
[K].IELPATVTGKPEPK.[I]		Ttn-203; A0A0A0MTS7	15622	15635	261xx	83239788	110021782	75594944	73760064	60244236	55836283	74677504	90112466	96940162	74756082	73179752	104813872	90112466	0.862385	0.95956	0.848475	1.01077	1.32355	1.02408	0.985167	1.00615	1.05392	1.02085	1.17104	1.03877	1.03877	0.948401
[R].LQICDIKPR.[D]	1xCarbamidomethyl [C4]	Ttn-203; A0A0A0MTS7	14882	14890	250xx	89550466	113103600	77483738	76911112	63158234	59051686	77197425	89871528	103791966	77405968	73932452	101250346	89871528	0.927766	0.986438	0.869674	1.05395	1.38757	1.08305	1.0202	1.00346	1.12841	1.05704	1.18308	1.00345	1.05704	0.965146
[RK].IENLQEGCSYYFR.[V]	1xCarbamidomethyl [C8]	Ttn-203; A0A0A0MTS7	27173	27185	326xx	84830749	1.19124e+08	66427780	8.10155e+07	6.40406e+07	60749629	7.37217e+07	89784658	109193993	82163474	78711360	1.03813e+08	89784658	0.878868	1.03895	0.745583	1.1102	1.40695	1.11419	1.07457	1.00249	1.18714	1.12201	1.25956	1.02885	1.12201	0.957726
[R].AGSDLVLDAAVGGKPEPK.[I]		Ttn-203; A0A0A0MTS7	30975	30992	342xx	93877088	105766066	85944780	70722692	54228690	54647406	78333736	89383570	97878114	72077179	78001074	98281644	89383570	0.972591	0.922443	0.964641	0.969151	1.19139	1.00227	0.970871	0.99801	1.06412	0.984269	1.24819	0.974028	0.99801	0.972807
[R].AVPVPTVSWHK.[D]		Ttn-203; A0A0A0MTS7	16326	16336	270xx	84816620	106522000	71970972	72366724	59700328	54797816	72168848	88682748	89203828	65975714	65092482	91568002	88682748	0.878722	0.929036	0.807799	0.99168	1.3116	1.00503	0.960358	0.990185	0.96981	0.900949	1.04162	0.907492	0.96981	0.990254
[K].VDIPISGKPLPK.[V]		Ttn-203; A0A0A0MTS7	28410	28421	328xx	96211834	111379572	91120960	73864192	57176840	54955818	82492576	88522526	104163192	74632892	70615206	102916832	88522526	0.996779	0.971402	1.02274	1.0122	1.25616	1.00793	1.01006	0.988396	1.13245	1.01917	1.13	1.01997	1.01997	0.990293
[R].FGIGPPAETIQR.[T]		Ttn-203	17905	17916	287xx	88995296	112100000	82088904	75012024	60415924	58425452	78550464	88230208	96374568	71351904	69978712	99749576	88230208	0.922014	0.977685	0.921363	1.02793	1.32732	1.07156	1.00281	0.985132	1.04777	0.974365	1.11981	0.988576	0.988576	1.0144
[K].VIDKPTDTLNITK.[E]		Ttn-203	17352	17364	280xx	92857944	108321876	88546006	70838022	56965064	53488508	79692014	88224144	100794152	75602910	69364568	99987328	88224144	0.962032	0.944734	0.993837	0.970732	1.25151	0.981016	0.975874	0.985064	1.09582	1.03242	1.10999	0.990932	1.03242	0.945234
[R].FGPPGPPGKPEISNVTK.[N]		Ttn-203	22483	22499	324xx	98355098	117826980	89369662	74041766	39793340	55041102	81705714	90230664	87574036	72042260	59054710	101359810	87574036	1.01898	1.02763	1.00308	1.01463	0.874247	1.00949	1.01206	1.00747	0.952091	0.983792	0.945006	1.00453	0.983792	1.02874
[R].FGPPGPPGKPEISNVTK.[N]		Ttn-203	22483	22499	325xx	98355098	117826980	89369662	74041766	39793340	55041102	81705714	90230664	87574036	72042260	59054710	101359810	87574036	1.01898	1.02763	1.00308	1.01463	0.874247	1.00949	1.01206	1.00747	0.952091	0.983792	0.945006	1.00453	0.983792	1.02874
[R].VQILDKPGPPGGPIEFK.[T]		Ttn-203; A0A0A0MTS7	28874	28890	331xx	91932620	109649222	77832724	74758900	56823013	55311544	76295812	87213824	98271724	74956077	70963384	98126732	87213824	0.952445	0.95631	0.873591	1.02446	1.24838	1.01445	0.985381	0.973783	1.06839	1.02358	1.13557	0.972492	1.02358	0.962679
[R].VQILDKPGPPGGPIEFK.[T]		Ttn-203; A0A0A0MTS7	28874	28890	332xx	91932620	109649222	77832724	74758900	56823013	55311544	76295812	87213824	98271724	74956077	70963384	98126732	87213824	0.952445	0.95631	0.873591	1.02446	1.24838	1.01445	0.985381	0.973783	1.06839	1.02358	1.13557	0.972492	1.02358	0.962679
[K].AGEDVQLLIPFK.[G]		Ttn-203	29199	29210	335xx	87894408	109823600	85931248	78819040	61590408	59420800	82375144	86962552	104963888	76689256	75415416	102167504	86962552	0.910609	0.957831	0.964489	1.0801	1.35312	1.08982	1.02229	0.970978	1.14115	1.04725	1.20681	1.01254	1.04725	0.97617
[R].EYTLTHLPQGAEYR.[F]		Ttn-203; A0A0A0MTS7	32005	32018	351xx	79901586	101824940	73651106	72857976	56011706	53682838	73254541	86746370	95932074	68302382	63963364	97285618	86746370	0.827801	0.888071	0.826657	0.998412	1.23056	0.98458	0.936325	0.968564	1.04296	0.932721	1.02356	0.964156	0.968564	0.966715
[K].DILHPPEVELDVTCR.[D]	1xCarbamidomethyl [C14]	Ttn-203; A0A0A0MTS7	19815	19829	304xx	88026650	115064244	70804946	73024258	56500178	54715869	71914602	86322256	91930638	70432388	64254016	93957150	86322256	0.911979	1.00354	0.794712	1.00069	1.24129	1.00353	1.00211	0.963829	0.999455	0.961808	1.02821	0.931169	0.963829	1.03972
[K].LLAGITVK.[A]		Ttn-203; A0A0A0MTS7	15610	15617	261xx	80070412	107810680	70450900	72108946	63273978	59671686	71279923	86250584	94787898	75702074	73018740	96842722	86250584	0.82955	0.940275	0.790738	0.988148	1.39011	1.09442	0.964212	0.963028	1.03052	1.03377	1.16846	0.959767	1.03052	0.935656
[K].SAANLIVEEEDLR.[I]		Ttn-203; A0A0A0MTS7	14637	14649	247xx	8.27311e+07	1.06505e+08	7.44722e+07	7.56939e+07	5.86632e+07	56562207	75083051	8.62362e+07	97471077	6.98992e+07	69258453	96186078	8.62362e+07	0.857115	0.92889	0.835873	1.03727	1.28881	1.03739	0.983082	0.962867	1.05969	0.954527	1.10829	0.953259	0.962867	1.02099
[K].SAANLIVEEEDLR.[I]		Ttn-203; A0A0A0MTS7	14637	14649	248xx	8.27311e+07	1.06505e+08	7.44722e+07	7.56939e+07	5.86632e+07	56562207	75083051	8.62362e+07	97471077	6.98992e+07	69258453	96186078	8.62362e+07	0.857115	0.92889	0.835873	1.03727	1.28881	1.03739	0.983082	0.962867	1.05969	0.954527	1.10829	0.953259	0.962867	1.02099
[R].SITVHEGESAR.[F]		Ttn-203	34483	34493	358xx	76360736	87734032	78373104	63788136	53095448	53012140	70074436	85753034	91607378	68762915	61671511	89310958	85753034	0.791117	0.765176	0.879657	0.874123	1.16649	0.972279	0.87689	0.957473	0.995941	0.93901	0.986881	0.885123	0.957473	0.915838
[K].DLSLIVTGLK.[E]		Ttn-203	20769	20778	308xx	71316105	100675148	62077192	61397673	61504590	58827210	61790891	85368027	91338997	79227510	70193798	92624404	85368027	0.738853	0.878043	0.696752	0.841365	1.35124	1.07893	0.859704	0.953174	0.993023	1.08191	1.12326	0.917961	0.993023	0.865744
[K].DIEIKPSVELPFNTFNVK.[A]		Ttn-203	27304	27321	326xx	85887668	103950638	80172052	69447262	51678356	50709940	74809657	84706402	97798470	70422179	66597009	94420324	84706402	0.889818	0.90661	0.899848	0.951673	1.13536	0.930055	0.918333	0.945787	1.06325	0.961669	1.0657	0.93576	0.961669	0.954937
[K].ALVPGNIFK.[S]		Ttn-203; A0A0A0MTS7	23225	23233	326xx	86125000	104925384	79417088	72465176	60093496	55188212	75941132	83747824	97745768	75306944	71352088	97814640	83747824	0.892277	0.915111	0.891374	0.993029	1.32024	1.01219	0.95407	0.935084	1.06268	1.02837	1.14179	0.969399	1.02837	0.927746
[R].AEDPVFLPSPPSKPK.[I]		Ttn-203; A0A0A0MTS7	27991	28005	326xx	88247098	103612098	84415840	67081524	52849193	49723583	75748682	83163014	96177750	70128282	67228524	95585582	83163014	0.914263	0.903657	0.94748	0.919254	1.16108	0.911965	0.916758	0.928554	1.04563	0.957655	1.07581	0.947308	0.957655	0.957295
[R].VNVEETATSTILHIK.[E]		Ttn-203	26272	26286	326xx	89838424	114279726	73248414	63729165	53128367	50733903	6.84888e+07	82991574	84455810	67368479	59407104	87760310	82991574	0.930749	0.996696	0.822137	0.873315	1.16721	0.930495	0.930622	0.92664	0.91819	0.919968	0.950646	0.869755	0.919968	1.01158
[R].VLGIPVIAK.[D]		Ttn-203	26212	26220	326xx	91157408	107485544	82358720	70651112	56292724	5.2245e+07	76504916	82842848	95101216	70590696	66076484	94062440	82842848	0.944414	0.93744	0.924391	0.96817	1.23673	0.95821	0.951312	0.924979	1.03393	0.96397	1.05737	0.932213	0.96397	0.986869
[R].LVSPDLQLDASVR.[D]		Ttn-203; A0A0A0MTS7	18433	18445	293xx	77969352	100192808	66081680	71337768	60370920	56461520	68709724	82213256	89886432	70987320	68958216	96744000	82213256	0.807782	0.873836	0.741698	0.97758	1.32633	1.03554	0.925708	0.91795	0.977231	0.969386	1.10348	0.958789	0.969386	0.954942
[R].LVSPDLQLDASVR.[D]		Ttn-203; A0A0A0MTS7	18433	18445	294xx	77969352	100192808	66081680	71337768	60370920	56461520	68709724	82213256	89886432	70987320	68958216	96744000	82213256	0.807782	0.873836	0.741698	0.97758	1.32633	1.03554	0.925708	0.91795	0.977231	0.969386	1.10348	0.958789	0.969386	0.954942
[K].ATGLQEGTEYEFR.[V]		Ttn-203; A0A0A0MTS7	21463	21475	315xx	86522614	103843616	78532730	80329948	57455742	55547000	79431339	81906780	99094840	65968960	64350086	87752158	81906780	0.896396	0.905677	0.881448	1.1008	1.26229	1.01877	0.962223	0.914528	1.07734	0.900857	1.02974	0.869674	0.914528	1.05215
[R].VLDSPSAPVNLTIR.[E]		Ttn-203; A0A0A0MTS7	27109	27122	326xx	80713736	98789912	77165472	74017016	57201976	54996220	75591244	81787256	93727688	69761040	67718008	95978384	81787256	0.836215	0.8616	0.866102	1.0143	1.25671	1.00867	0.937385	0.913193	1.01899	0.95264	1.08364	0.951201	0.95264	0.983987
[K].ELVITPEVDLSEIPGAQISVR.[I]		Ttn-203	29470	29490	335xx	84875324	108093188	77721730	70959646	53802098	53729198	74340688	81717140	94958720	67310146	66637076	93739928	81717140	0.87933	0.942739	0.872346	0.972398	1.18202	0.985431	0.957569	0.91241	1.03238	0.919172	1.06634	0.929017	0.929017	1.03073
[R].IGHNVHLELPYK.[G]		Ttn-203; A0A0A0MTS7	29491	29502	335xx	89149189	116715452	64449325	61784015	4.68288e+07	4.64529e+07	63116670	81601998	82735942	5.72628e+07	5.08032e+07	82127991	81601998	0.923608	1.01794	0.723377	0.84666	1.02881	0.851978	0.887793	0.911125	0.899492	0.781967	0.812964	0.813936	0.813936	1.09074
[K].DGLEVIVPNPIK.[I]		Ttn-203	15316	15327	256xx	7.16105e+07	99686336	6.46617e+07	73490582	5.74321e+07	5.36103e+07	68136124	81573472	94987008	69528389	6.8486e+07	9.29758e+07	81573472	0.741904	0.869419	0.72576	1.00708	1.26177	0.98325	0.926335	0.910806	1.03268	0.949463	1.09593	0.921444	0.949463	0.97564
[R].NSFPITIITLGPPSKPK.[G]		Ttn-203	29559	29575	335xx	79199444	107222476	62651898	66272848	58904990	54825436	64462373	81180168	90705314	71465164	65809692	87983286	81180168	0.820526	0.935145	0.703202	0.908173	1.29412	1.00554	0.921659	0.906415	0.986134	0.975912	1.0531	0.871965	0.975912	0.944408
[R].SSISIPGPPETLQIFDVSR.[D]		Ttn-203	31841	31859	349xx	80748070	104588676	73836188	72304875	55323226	56169284	7.30705e+07	80736626	95321612	68134088	68283825	93412218	80736626	0.836571	0.912175	0.828734	0.990833	1.21543	1.03018	0.951504	0.901463	1.03632	0.930423	1.09269	0.925769	0.930423	1.02266
[R].SSISIPGPPETLQIFDVSR.[D]		Ttn-203	31841	31859	350xx	80748070	104588676	73836188	72304875	55323226	56169284	7.30705e+07	80736626	95321612	68134088	68283825	93412218	80736626	0.836571	0.912175	0.828734	0.990833	1.21543	1.03018	0.951504	0.901463	1.03632	0.930423	1.09269	0.925769	0.930423	1.02266
[K].NDHISAHLEVPK.[S]		Ttn-203; A0A0A0MTS7	16351	16362	270xx	83439244	105601690	66747772	64749826	46990222	46477445	65748799	80680556	81422040	57168143	5.12007e+07	84138621	80680556	0.864452	0.92101	0.749174	0.887302	1.03236	0.852428	0.875877	0.900836	0.885207	0.780675	0.819325	0.833862	0.833862	1.05039
[K].FPFDVPSEPK.[N]		Ttn-203	21001	21010	310xx	78901368	100848320	74642376	63629432	49205992	47790656	69135904	80619064	90617256	62963276	58141360	89640232	80619064	0.817438	0.879553	0.837783	0.871948	1.08104	0.876514	0.874231	0.90015	0.985176	0.859812	0.930391	0.888386	0.90015	0.971206
[K].FPFDVPSEPK.[N]		Ttn-203	21001	21010	311xx	78901368	100848320	74642376	63629432	49205992	47790656	69135904	80619064	90617256	62963276	58141360	89640232	80619064	0.817438	0.879553	0.837783	0.871948	1.08104	0.876514	0.874231	0.90015	0.985176	0.859812	0.930391	0.888386	0.90015	0.971206
[K].ITWSKPNVNLR.[DE]		Ttn-203; A0A0A0MTS7	21639	21649	317xx	68014016	90215578	69197562	78399762	66324276	59072856	68605789	80282538	100820350	80070236	77623970	103903420	80282538	0.704643	0.786819	0.776671	1.07435	1.45712	1.08344	0.930587	0.896392	1.0961	1.09342	1.24216	1.02974	1.09342	0.851079
[K].SPFEKPGVPGKPTITAVTK.[D]		Ttn-203	32734	32752	356xx	87172088	102937657	78789744	59493792	4.7876e+07	4.5017e+07	69141768	79637135	87391555	6.38062e+07	5.64554e+07	89410052	79637135	0.903125	0.897775	0.884333	0.815275	1.05182	0.825643	0.891054	0.889186	0.950107	0.871323	0.903412	0.886105	0.889186	1.0021
[K].SPFEKPGVPGKPTITAVTK.[D]		Ttn-203	32734	32752	357xx	87172088	102937657	78789744	59493792	4.7876e+07	4.5017e+07	69141768	79637135	87391555	6.38062e+07	5.64554e+07	89410052	79637135	0.903125	0.897775	0.884333	0.815275	1.05182	0.825643	0.891054	0.889186	0.950107	0.871323	0.903412	0.886105	0.889186	1.0021
[K].VSVLDVPGPPGPIEISNVSAEK.[A]		Ttn-203	22381	22402	324xx	84778754	101757410	75590242	68560258	52182885	50933377	72075250	79481702	90932930	64661620	63841982	90769576	79481702	0.87833	0.887482	0.848422	0.939518	1.14644	0.934153	0.910817	0.887451	0.988608	0.883004	1.02161	0.899579	0.899579	1.01249
[K].IADFSTHLINK.[D]		Ttn-203	23426	23436	326xx	64279924	102152448	48995464	63640216	47891787	44667742	56317840	82422646	82235006	61080099	58341084	79246354	79246354	0.665956	0.890927	0.549923	0.872096	1.05217	0.819237	0.845667	0.920288	0.894046	0.834096	0.933587	0.785377	0.894046	0.945887
[K].LIPGQEYIFR.[V]		Ttn-203; A0A0A0MTS7	20970	20979	310xx	80897792	103819368	69303064	69072528	55759148	52013444	69187796	79121472	93661008	70122592	66722056	89771280	79121472	0.838122	0.905465	0.777855	0.946538	1.22501	0.953963	0.926002	0.883429	1.01827	0.957578	1.0677	0.889685	0.957578	0.967025
[K].VLDTPGPVADLK.[V]		Ttn-203	20609	20620	306xx	81721224	97138280	75342312	67274928	52561468	51010628	71308620	79083928	89098136	68204176	64493716	87313736	79083928	0.846653	0.847196	0.845639	0.921905	1.15476	0.93557	0.88455	0.883009	0.968661	0.93138	1.03204	0.865329	0.93138	0.94972
[K].VLDTPGPVADLK.[V]		Ttn-203	20609	20620	307xx	81721224	97138280	75342312	67274928	52561468	51010628	71308620	79083928	89098136	68204176	64493716	87313736	79083928	0.846653	0.847196	0.845639	0.921905	1.15476	0.93557	0.88455	0.883009	0.968661	0.93138	1.03204	0.865329	0.93138	0.94972
[R].DAHRPGWLPVSESVTRPTFK.[F]		Ttn-203	31787	31806	349xx	78612090	95457332	56256665	58862020	49180165	44168745	5.75593e+07	79063678	84519272	61215082	57751955	81186580	79063678	0.814441	0.832535	0.631423	0.806618	1.08047	0.810085	0.812263	0.882783	0.91888	0.835939	0.924159	0.804606	0.882783	0.920116
[R].LQGDLVTIR.[A]		Ttn-203	30966	30974	342xx	70661288	90234480	66891984	62898356	50349112	50641276	64895170	79022528	87009280	64141216	65567296	85473520	79022528	0.732069	0.786984	0.750793	0.86193	1.10615	0.928796	0.824457	0.882324	0.945951	0.875897	1.04922	0.847092	0.882324	0.934415
[R].VYAENIVGVGK.[A]		Ttn-203; A0A0A0MTS7	25411	25421	326xx	82201800	96386144	76041320	67796768	55742732	49942576	71919044	78391240	86872704	68142576	64147424	91215952	78391240	0.851632	0.840636	0.853485	0.929056	1.22465	0.915981	0.884733	0.875275	0.944466	0.930539	1.0265	0.904003	0.930539	0.950775
[K].VLDTPGPPVNVTVK.[E]		Ttn-203; A0A0A0MTS7	21697	21710	317xx	81964176	101891408	76989240	68391408	56912164	53061096	72690324	78198552	90882296	68368032	66435344	93447824	78198552	0.84917	0.88865	0.864124	0.937204	1.25034	0.973177	0.912927	0.873124	0.988058	0.933618	1.06311	0.926122	0.933618	0.977838
[K].VLDTPGPPVNVTVK.[E]		Ttn-203; A0A0A0MTS7	21697	21710	318xx	81964176	101891408	76989240	68391408	56912164	53061096	72690324	78198552	90882296	68368032	66435344	93447824	78198552	0.84917	0.88865	0.864124	0.937204	1.25034	0.973177	0.912927	0.873124	0.988058	0.933618	1.06311	0.926122	0.933618	0.977838
[K].VPGPPGTPQVTAVTK.[D]		Ttn-203; A0A0A0MTS7	23172	23186	326xx	89479512	103088856	77299560	65822660	51483228	47505360	71561110	78060840	88437024	61549756	58779564	90909056	78060840	0.927031	0.899094	0.867607	0.902003	1.13107	0.871281	0.900549	0.871586	0.961473	0.840509	0.940604	0.900961	0.900961	0.999542
[RK].HPFDVPDAPPPPNIVDVR.[H]		Ttn-203; A0A0A0MTS7	22085	22102	320xx	86408858	107826948	70824743	65329638	47060976	45254804	6.80772e+07	77924168	84048142	59241166	54439180	85502050	77924168	0.895218	0.940417	0.794934	0.895247	1.03392	0.830004	0.895233	0.87006	0.913758	0.808983	0.871148	0.847375	0.87006	1.02893
[RK].HPFDVPDAPPPPNIVDVR.[H]		Ttn-203; A0A0A0MTS7	22085	22102	321xx	86408858	107826948	70824743	65329638	47060976	45254804	6.80772e+07	77924168	84048142	59241166	54439180	85502050	77924168	0.895218	0.940417	0.794934	0.895247	1.03392	0.830004	0.895233	0.87006	0.913758	0.808983	0.871148	0.847375	0.87006	1.02893
[R].VTGLLENHNYEFR.[V]		Ttn-203	24712	24724	326xx	76160384	99438298	6.50782e+07	67542144	52296660	51345798	6.63102e+07	77743068	86360276	61380818	58379456	84374340	77743068	0.789041	0.867255	0.730435	0.925566	1.14894	0.941717	0.896411	0.868038	0.938895	0.838202	0.934201	0.836198	0.868038	1.03269
[R].DPISPPGPPVPR.[V]		Ttn-203	16912	16923	275xx	61722016	99139488	46566956	75287288	49237620	41971744	55479818	77632592	89606936	61696084	64093924	79590224	77632592	0.639456	0.864649	0.522666	1.0317	1.08174	0.769791	0.81722	0.866804	0.974192	0.842507	1.02565	0.788785	0.866804	0.942796
[R].DPISPPGPPVPR.[V]		Ttn-203	16912	16923	276xx	61722016	99139488	46566956	75287288	49237620	41971744	55479818	77632592	89606936	61696084	64093924	79590224	77632592	0.639456	0.864649	0.522666	1.0317	1.08174	0.769791	0.81722	0.866804	0.974192	0.842507	1.02565	0.788785	0.866804	0.942796
[K].DVLEEPEIDLDVALR.[T]		Ttn-203	29178	29192	334xx	74506775	98431142	6.79825e+07	6.78422e+07	5.1234e+07	4.97174e+07	6.79124e+07	77302940	8.92167e+07	64796319	64483281	87447074	77302940	0.771909	0.858471	0.763033	0.929679	1.12559	0.911852	0.885162	0.863124	0.96995	0.884843	1.03188	0.866651	0.884843	1.00036
[K].DVLEEPEIDLDVALR.[T]		Ttn-203	29178	29192	335xx	74506775	98431142	6.79825e+07	6.78422e+07	5.1234e+07	4.97174e+07	6.79124e+07	77302940	8.92167e+07	64796319	64483281	87447074	77302940	0.771909	0.858471	0.763033	0.929679	1.12559	0.911852	0.885162	0.863124	0.96995	0.884843	1.03188	0.866651	0.884843	1.00036
[K].VWTIEEGELDKER.[V]		Ttn-203	17051	17063	277xx	82160148	97152232	70067440	65382928	54125732	51816628	67725184	77280562	83549682	66312443	60460577	86060544	77280562	0.8512	0.847317	0.786434	0.895977	1.18913	0.950353	0.873589	0.862874	0.908339	0.905547	0.967503	0.85291	0.905547	0.964708
[R].VLAENLAGPGKPSR.[S]		Ttn-203	15871	15884	264xx	80678468	93839192	73910584	63095626	49729877	47448098	68503105	76808370	86023670	61836569	60605331	84939424	76808370	0.83585	0.818423	0.829569	0.864633	1.09255	0.870231	0.850241	0.857602	0.935236	0.844426	0.96982	0.841799	0.857602	0.991418
[K].VLDSPGPPGPITFK.[D]		Ttn-203	30359	30372	339xx	76591880	98710072	68494312	68087096	55857488	51703744	68290704	76595856	89494760	65984164	65607092	92302016	76595856	0.793511	0.860904	0.768777	0.933034	1.22717	0.948282	0.896969	0.855229	0.972973	0.901064	1.04986	0.914766	0.914766	0.980545
[K].VLDKPGPPASVK.[I]		Ttn-203; A0A0A0MTS7	21299	21310	313xx	78376170	91477240	72567096	59951098	49711018	46306499	66259097	76438202	87577152	64652060	59588086	84282258	76438202	0.811997	0.797823	0.81449	0.821542	1.09214	0.849293	0.818016	0.853469	0.952125	0.882873	0.953542	0.835286	0.882873	0.926539
[K].VLDKPGPPASVK.[I]		Ttn-203; A0A0A0MTS7	21299	21310	314xx	78376170	91477240	72567096	59951098	49711018	46306499	66259097	76438202	87577152	64652060	59588086	84282258	76438202	0.811997	0.797823	0.81449	0.821542	1.09214	0.849293	0.818016	0.853469	0.952125	0.882873	0.953542	0.835286	0.882873	0.926539
[K].YGLGVPVESEPIVAR.[N]		Ttn-203	31134	31148	343xx	77149088	91861432	68696288	67273528	50671816	50381668	67984908	75993576	84674144	61588984	59891784	85836696	75993576	0.799284	0.801173	0.771044	0.921885	1.11324	0.924035	0.861529	0.848504	0.920564	0.841045	0.958402	0.850691	0.850691	1.01274
[R].YEITAANSSGTTK.[AT]		Ttn-203; A0A0A0MTS7	28461	28473	328xx	69506984	73235032	74224896	70949392	54093024	NA	70949392	75899112	91538752	59919540	63129000	87137984	75899112	0.72011	0.638722	0.833097	0.972258	1.18841		0.833097	0.847449	0.995195	0.818247	1.0102	0.863588	0.863588	0.964694
[K].SDVPIQAPHFK.[E]		Ttn-203; A0A0A0MTS7	32835	32845	357xx	81376520	94975918	71113854	65036896	47148942	46631797	68075375	75546644	84796308	58936414	55012548	79749490	75546644	0.843082	0.828337	0.798179	0.891236	1.03585	0.855259	0.84917	0.843514	0.921892	0.804822	0.880323	0.790363	0.843514	1.00671
[K].TTPTTLALEK.[T]		Ttn-203	18783	18792	297xx	75277836	89195791	73418010	65884390	5.03961e+07	48539428	69651200	75355582	83505617	6.3422e+07	59817985	85073575	75355582	0.779898	0.777925	0.824041	0.902849	1.10719	0.890247	0.857144	0.841381	0.90786	0.866076	0.957221	0.843128	0.866076	0.989686
[K].NAFVTPGPPSIPEVTK.[I]		Ttn-203	28975	28990	332xx	77253312	89607184	72443184	64864884	50332608	50102600	68654034	75177104	85452976	58435100	57886240	84756016	75177104	0.800364	0.781513	0.813099	0.888878	1.10579	0.918916	0.850989	0.839388	0.929031	0.797976	0.926308	0.839981	0.839981	1.01311
[K].NAFVTPGPPSIPEVTK.[I]		Ttn-203	28975	28990	333xx	77253312	89607184	72443184	64864884	50332608	50102600	68654034	75177104	85452976	58435100	57886240	84756016	75177104	0.800364	0.781513	0.813099	0.888878	1.10579	0.918916	0.850989	0.839388	0.929031	0.797976	0.926308	0.839981	0.839981	1.01311
[R].VLDTPSPPVNLK.[V]		Ttn-203; A0A0A0MTS7	24944	24955	326xx	72133568	89086808	68877344	65941976	51029120	50868332	67409660	74978592	85076600	65932176	61230728	84626208	74978592	0.747322	0.776974	0.773077	0.903638	1.12109	0.93296	0.840306	0.837171	0.924939	0.900354	0.979828	0.838694	0.900354	0.933306
[K].VYDTPGPCPSVSVK.[E]	1xCarbamidomethyl [C8]	Ttn-203	31448	31461	346xx	71066352	88608032	60866772	61918336	48811284	44660628	61392554	74814344	80943528	60804548	57667912	79690856	74814344	0.736266	0.772799	0.683166	0.8485	1.07237	0.819107	0.795953	0.835337	0.880005	0.830333	0.922815	0.789782	0.835337	0.952852
[K].VYDTPGPCPSVSVK.[E]	1xCarbamidomethyl [C8]	Ttn-203	31448	31461	347xx	71066352	88608032	60866772	61918336	48811284	44660628	61392554	74814344	80943528	60804548	57667912	79690856	74814344	0.736266	0.772799	0.683166	0.8485	1.07237	0.819107	0.795953	0.835337	0.880005	0.830333	0.922815	0.789782	0.835337	0.952852
[K].LLPGNEYIFR.[V]		Ttn-203; A0A0A0MTS7	26780	26789	326xx	75407016	93551096	67792208	62444144	51998612	49371412	65118176	74701608	86565800	65948568	63032288	86053920	74701608	0.781236	0.81591	0.760897	0.855706	1.14239	0.905506	0.835808	0.834079	0.94113	0.900578	1.00866	0.852844	0.900578	0.928079
[R].LSWTQVSNEVQALNYK.[V]		Ttn-203	26761	26776	326xx	69731952	95122672	59866868	58484532	46476080	53495516	59175700	89120480	76559128	73208528	52403700	74677664	74677664	0.722441	0.829616	0.671943	0.801445	1.02107	0.981145	0.815531	0.995072	0.832339	0.999718	0.838576	0.740099	0.838576	0.972519
[K].ANHVNVPDCAFTVTDLVEGGK.[Y]	1xCarbamidomethyl [C9]	Ttn-203	22237	22257	323xx	68990883	83839138	68354408	49971008	56574262	50580366	62464335	73491244	99813436	68127092	66080506	94495728	73491244	0.714763	0.731207	0.767207	0.68478	1.24292	0.927679	0.749207	0.820564	1.08516	0.930328	1.05743	0.936507	0.936507	0.800001
[R].FGVTITVHPEPR.[V]		Ttn-203	33622	33633	358xx	72319778	97043304	53368168	54651825	46581582	43684397	5.401e+07	73413056	73865176	54819258	52582127	75248508	73413056	0.749251	0.846367	0.599002	0.748923	1.02338	0.801202	0.775227	0.819691	0.80305	0.748599	0.841431	0.745756	0.80305	0.965352
[R].FGISEPLTSPK.[M]		Ttn-203; A0A0A0MTS7	20986	20996	310xx	77678144	91521704	70137968	65759284	52062188	49817296	67948626	73280040	84826432	64817372	61421584	82457296	73280040	0.804765	0.79821	0.787226	0.901135	1.14379	0.913684	0.85295	0.818206	0.922219	0.885131	0.982882	0.817199	0.885131	0.963643
[R].VTGLTEGHSYEFR.[V]		Ttn-203; A0A0A0MTS7	26877	26889	326xx	74328588	89852388	64117054	63235820	44814356	44386373	63676437	73000924	78845602	59142800	55253570	80982400	73000924	0.770063	0.783651	0.719647	0.866555	0.984558	0.814077	0.798864	0.81509	0.857197	0.80764	0.88418	0.802582	0.81509	0.980093
[K].VPGPPGTPFVTLASK.[D]		Ttn-203	24254	24268	326xx	88268208	108800000	52899660	66810364	52381648	48547488	59855012	72905168	89450936	60237488	56496004	73502408	72905168	0.914481	0.948904	0.593744	0.915538	1.15081	0.890395	0.91501	0.814021	0.972496	0.822589	0.904061	0.728451	0.822589	1.11235
[R].VFAENAAGLSLPSETSPLVR.[A]		Ttn-203	27971	27990	326xx	74717126	91861726	69530370	64640328	50534450	47907521	67085349	72903724	84475722	61539058	60287479	83722432	72903724	0.774089	0.801176	0.780406	0.885801	1.11023	0.878657	0.839917	0.814004	0.918407	0.840363	0.964734	0.829737	0.840363	0.999469
[K].LLEGHEYVFR.[I]		Ttn-203; A0A0A0MTS7	18195	18204	290xx	76550802	99299590	59873164	56413639	46064245	43138043	5.81434e+07	72885514	75306988	57282130	53456863	77899518	72885514	0.793086	0.866046	0.672014	0.773066	1.01202	0.791182	0.792134	0.813801	0.818726	0.782231	0.855428	0.772029	0.813801	0.973375
[K].STDFDTFLR.[C]		Ttn-203; A0A0A0MTS7	21658	21666	317xx	66774432	84786448	64659556	62172288	51026720	47184552	63415922	72870560	80556656	63229972	60753336	81765016	72870560	0.6918	0.739469	0.725736	0.85198	1.12104	0.865397	0.795724	0.813634	0.875799	0.863454	0.972188	0.810338	0.863454	0.92156
[R].VLDTPGPPQNLK.[I]		Ttn-203	23862	23873	326xx	74212760	87329632	68262704	60363348	47942076	46764900	64313026	72692304	81594128	62224832	59967964	83539144	72692304	0.768863	0.761649	0.766178	0.827191	1.05327	0.857701	0.798027	0.811644	0.887078	0.849728	0.959621	0.827921	0.849728	0.939157
[K].YGVGDPILTEPAIAK.[N]		Ttn-203	21382	21396	314xx	80129320	88469440	75309848	65250160	48448584	47510780	70280004	72625536	81594472	57868480	55270132	80743392	72625536	0.83016	0.77159	0.845275	0.894158	1.0644	0.871381	0.858328	0.810898	0.887082	0.790238	0.884445	0.800213	0.810898	1.05849
[K].TPLNPPEPPSNPPEVLDVTK.[S]		Ttn-203; A0A0A0MTS7	32238	32257	352xx	72979133	91889430	67659312	60812662	45857121	44918252	64235987	72224624	75914760	55802098	55538238	81869344	72224624	0.756082	0.801418	0.759405	0.833349	1.00747	0.823832	0.812625	0.806422	0.825333	0.76202	0.888735	0.811372	0.811372	1.00154
[K].TPLNPPEPPSNPPEVLDVTK.[S]		Ttn-203; A0A0A0MTS7	32238	32257	353xx	72979133	91889430	67659312	60812662	45857121	44918252	64235987	72224624	75914760	55802098	55538238	81869344	72224624	0.756082	0.801418	0.759405	0.833349	1.00747	0.823832	0.812625	0.806422	0.825333	0.76202	0.888735	0.811372	0.811372	1.00154
[K].VLDTPGPPQNLAVK.[E]		Ttn-203; A0A0A0MTS7	26026	26039	326xx	75685808	91359856	69584392	62389760	48671652	49259828	65987076	72156928	81529968	61996436	59552668	83758560	72156928	0.784124	0.796799	0.781012	0.85496	1.0693	0.903459	0.82588	0.805666	0.886381	0.846609	0.952975	0.830096	0.846609	0.975515
[R].VTLVDVTR.[N]		Ttn-203; A0A0A0MTS7	27216	27223	326xx	71795512	84396128	64239144	63144340	49318060	46736532	63691742	71145040	77572144	62312064	58836868	78118000	71145040	0.74382	0.736064	0.721018	0.865301	1.0835	0.85718	0.8005	0.794368	0.843352	0.850919	0.941521	0.774194	0.843352	0.949189
[R].DPITVPERPEDLEVK.[E]		Ttn-203	18626	18640	295xx	69788956	90980894	60145038	63662636	49944207	46520229	61903837	70863212	78471558	60383411	57892517	78327430	70863212	0.723031	0.793494	0.675066	0.872403	1.09726	0.853213	0.823353	0.791221	0.85313	0.824582	0.926409	0.77627	0.824582	0.99851
[R].DPITVPERPEDLEVK.[E]		Ttn-203	18626	18640	296xx	69788956	90980894	60145038	63662636	49944207	46520229	61903837	70863212	78471558	60383411	57892517	78327430	70863212	0.723031	0.793494	0.675066	0.872403	1.09726	0.853213	0.823353	0.791221	0.85313	0.824582	0.926409	0.77627	0.824582	0.99851
[R].SSVSLAWNKPIYDGGAPVR.[G]		Ttn-203	26931	26949	326xx	71404030	90771118	63548349	58427949	47430588	45544012	60988149	70460382	80818972	60886520	58474505	82757324	70460382	0.739764	0.791664	0.713264	0.80067	1.04204	0.835309	0.796167	0.786723	0.878651	0.831452	0.935722	0.820173	0.831452	0.957562
[K].VSGLTEGHEYEFR.[I]		Ttn-203; A0A0A0MTS7	23630	23642	326xx	74039202	91019360	62026296	60292030	44811751	44938755	61159163	70270756	74281996	55128413	50022803	75679192	70270756	0.767065	0.793829	0.696181	0.826214	0.9845	0.824208	0.809019	0.784606	0.807582	0.752821	0.800476	0.750024	0.784606	1.03111
[R].TLLTIENANR.[N]		Ttn-203	28154	28163	326xx	66860044	78129280	65102724	63348204	49381588	46446436	64225464	70170120	77182400	60518204	56840316	78604880	70170120	0.692687	0.681408	0.73071	0.868095	1.0849	0.85186	0.791285	0.783482	0.839115	0.826422	0.909571	0.77902	0.826422	0.957483
[R].GKPIPDIIWSK.[D]		Ttn-203	26647	26657	326xx	74310538	92751936	63471946	56049816	47462860	44188530	59760881	70015524	80874602	61551656	57104556	81388910	70015524	0.769876	0.80894	0.712407	0.768081	1.04274	0.810448	0.789408	0.781756	0.879256	0.840535	0.9138	0.806611	0.840535	0.939173
[K].AVYAQDPLYPPGPPAFPK.[V]		Ttn-203	21493	21510	315xx	74347950	86084812	71218520	58569360	4.99316e+07	4.54913e+07	64893940	69711627	78561851	55991127	57142174	76339871	69711627	0.770264	0.750792	0.799354	0.802607	1.09698	0.834342	0.800981	0.778363	0.854112	0.764602	0.914402	0.756572	0.778363	1.02906
[K].AVYAQDPLYPPGPPAFPK.[V]		Ttn-203	21493	21510	316xx	74347950	86084812	71218520	58569360	4.99316e+07	4.54913e+07	64893940	69711627	78561851	55991127	57142174	76339871	69711627	0.770264	0.750792	0.799354	0.802607	1.09698	0.834342	0.800981	0.778363	0.854112	0.764602	0.914402	0.756572	0.778363	1.02906
[K].DLTIQPSFK.[L]		Ttn-203	26221	26229	326xx	70478327	83015169	6.76573e+07	60379295	4.80177e+07	4.49908e+07	6.40183e+07	69456860	78703497	60397530	55030724	77428831	69456860	0.730173	0.72402	0.759383	0.82741	1.05493	0.825163	0.792273	0.775519	0.855652	0.824774	0.880614	0.767364	0.824774	0.960593
[K].STGLTDGIAYEFR.[V]		Ttn-203	23234	23246	326xx	66177380	81668008	66466532	63359624	51010196	50211804	64768502	69450888	77869696	62307512	60425876	81903408	69450888	0.685615	0.712271	0.746018	0.868251	1.12068	0.920919	0.807134	0.775452	0.846587	0.850857	0.966948	0.81171	0.846587	0.953398
[K].TVTTLSIK.[E]		Ttn-203	27362	27369	326xx	67697730	80538352	64545988	59603622	46390098	4.50692e+07	62074805	69200926	80799942	59286424	56674424	77986910	69200926	0.701366	0.702419	0.724462	0.816781	1.01918	0.826601	0.770621	0.772661	0.878444	0.809601	0.906917	0.772895	0.809601	0.951852
[R].LSAPELDIDANFK.[Q]		Ttn-203	30266	30278	339xx	65704372	84985672	55928544	58066800	48489684	44993008	56997672	69182400	76183848	59135924	58877504	78932184	69182400	0.680714	0.741206	0.62774	0.795721	1.0653	0.825203	0.768463	0.772454	0.828259	0.807546	0.942171	0.782263	0.807546	0.951603
[K].SVFPELTK.[T]		Ttn-203	34397	34404	358xx	67962184	79108584	63028204	5.73288e+07	44642416	44117972	6.01785e+07	69039960	74020656	56897668	52790296	72428672	69039960	0.704106	0.689949	0.707426	0.785607	0.98078	0.809154	0.746516	0.770864	0.804741	0.776981	0.844762	0.71781	0.776981	0.960791
[K].YGVGEPLESESLIAK.[N]		Ttn-203	24631	24645	326xx	70287936	86278024	69056080	60823008	47824616	45815944	64939544	68914112	79364840	58735056	56803976	80626392	68914112	0.728201	0.752477	0.775083	0.83349	1.05069	0.840296	0.804287	0.769459	0.862842	0.802072	0.90899	0.799054	0.802072	1.00276
[R].GKPFPEVAWTK.[D]		Ttn-203; A0A0A0MTS7	20141	20151	304xx	74680542	88913092	69414158	56371450	43182399	41654312	62892804	68744660	77715898	59776952	52634728	76560200	68744660	0.77371	0.775459	0.779102	0.772488	0.948704	0.763969	0.774584	0.767567	0.844915	0.8163	0.842272	0.758756	0.8163	0.948897
[R].VLAVNEAGESDPAHVPEPVLVK.[D]		Ttn-203	19103	19124	300xx	56293486	88711837	4.19752e+07	56306229	5.64461e+07	47922499	5.62999e+07	6.84949e+07	70069365	61704233	54655856	75716363	6.84949e+07	0.583215	0.773704	0.471128	0.771595	1.2401	0.878932	0.772649	0.764778	0.761783	0.842619	0.874615	0.750393	0.764778	1.01029
[K].DQTCPPAIELK.[E]	1xCarbamidomethyl [C4]	Ttn-203	18027	18037	288xx	63569832	73801952	61993808	58468168	46769056	46949244	60230988	68358192	73974368	58349024	57310300	77764232	68358192	0.6586	0.643667	0.695816	0.801221	1.0275	0.861082	0.748518	0.763251	0.804238	0.796801	0.917092	0.770688	0.796801	0.939405
[K].DQTCPPAIELK.[E]	1xCarbamidomethyl [C4]	Ttn-203	18027	18037	289xx	63569832	73801952	61993808	58468168	46769056	46949244	60230988	68358192	73974368	58349024	57310300	77764232	68358192	0.6586	0.643667	0.695816	0.801221	1.0275	0.861082	0.748518	0.763251	0.804238	0.796801	0.917092	0.770688	0.796801	0.939405
[R].VSGIPAPTLK.[W]		Ttn-203	33731	33740	358xx	67834152	82580632	63437128	56891172	45761788	43118444	60164150	68356840	76895440	58286340	54361052	79241696	68356840	0.702779	0.720231	0.712016	0.77961	1.00537	0.790822	0.74992	0.763236	0.835995	0.795945	0.869898	0.785331	0.795945	0.942177
[K].SAFVTVK.[V]		Ttn-203; A0A0A0MTS7	26019	26025	326xx	67612440	83544262	60908300	59126150	45507680	43310458	60017225	68282556	77465372	56171692	54079594	77294780	68282556	0.700482	0.728635	0.683632	0.810237	0.99979	0.794344	0.761489	0.762407	0.842191	0.767067	0.865394	0.766036	0.767067	0.992728
[R].VYAENIAGIGK.[C]		Ttn-203; A0A0A0MTS7	27575	27585	326xx	66853976	80689496	63296888	57955724	44963036	42634292	60626306	68250344	74224480	55789288	53426168	76862752	68250344	0.692624	0.703737	0.710442	0.794199	0.987824	0.781942	0.746192	0.762047	0.806957	0.761845	0.854937	0.761754	0.762047	0.979194
[K].DSVHLTWEPPDDDGGSPLTGYVVEK.[R]		Ttn-203; A0A0A0MTS7	15416	15440	257xx	68115977	94356258	60530363	5.71246e+07	4.40304e+07	4.3708e+07	5.88275e+07	68139878	78012267	55819593	50791613	76078628	68139878	0.705699	0.822932	0.67939	0.782809	0.967335	0.801635	0.792222	0.760814	0.848137	0.762259	0.812779	0.753983	0.762259	1.03931
[K].VTGLTEGLEYEFR.[V]		Ttn-203; A0A0A0MTS7	22151	22163	322xx	64421701	8.30624e+07	61171885	6.28555e+07	5.07141e+07	4.95102e+07	6.20137e+07	6.79056e+07	7.7763e+07	6.28101e+07	60899452	78795690	6.79056e+07	0.667425	0.724432	0.686591	0.861342	1.11417	0.908052	0.792887	0.758198	0.845427	0.857721	0.974526	0.780911	0.845427	0.937854
[K].NSATLAWLPPLR.[D]		Ttn-203; A0A0A0MTS7	20727	20738	308xx	63940036	85822408	58882364	62814080	50675408	49140200	60848222	67740192	82262504	58825500	56680416	78069320	67740192	0.662435	0.748504	0.660893	0.860775	1.11332	0.901265	0.804639	0.756351	0.894345	0.803307	0.907012	0.773712	0.803307	1.00166
[R].NNEFTVPDLK.[M]		Ttn-203	31313	31322	345xx	64504212	77645216	62693184	59070244	47468996	46901296	60881714	67653696	75674576	57556676	57951828	78617376	67653696	0.66828	0.677186	0.703666	0.809471	1.04288	0.860202	0.756569	0.755385	0.822722	0.78598	0.927358	0.779143	0.78598	0.962579
[R].ISAINDAGVGEPAVIPNVEIVEK.[E]		Ttn-203	22662	22684	326xx	70741668	84527896	64897824	59962534	45681350	44739086	62430179	67639880	79370290	55893790	54209474	77163676	67639880	0.732902	0.737214	0.728411	0.821699	1.00361	0.820546	0.77888	0.755231	0.862901	0.763272	0.867472	0.764736	0.764736	1.01849
[K].TIIHDTQFK.[A]		Ttn-203; A0A0A0MTS7	25389	25397	326xx	67859512	84729892	56561966	55066438	42028504	39898219	55814202	67583042	68685328	51719102	47842156	71162634	67583042	0.703042	0.738975	0.634849	0.754605	0.923353	0.731761	0.735368	0.754597	0.746736	0.706264	0.765581	0.705263	0.746736	0.984777
[K].ITLTDVTR.[N]		Ttn-203	23969	23976	326xx	65119148	77103016	59727516	56200832	44842956	42811272	57964174	67573896	72817040	57508836	51470384	71193112	67573896	0.674651	0.672457	0.670379	0.77015	0.985186	0.785188	0.722401	0.754494	0.791655	0.785327	0.82364	0.705565	0.785327	0.919872
[K].ASETPGPVVDLK.[A]		Ttn-203	21794	21805	318xx	64298076	82731736	62228740	60748872	46865612	45699684	61488806	67525736	78108144	59717672	56789208	77204000	67525736	0.666145	0.721548	0.698453	0.832475	1.02962	0.838164	0.777011	0.753957	0.849179	0.815491	0.908753	0.765136	0.815491	0.952815
[K].ASETPGPVVDLK.[A]		Ttn-203	21794	21805	319xx	64298076	82731736	62228740	60748872	46865612	45699684	61488806	67525736	78108144	59717672	56789208	77204000	67525736	0.666145	0.721548	0.698453	0.832475	1.02962	0.838164	0.777011	0.753957	0.849179	0.815491	0.908753	0.765136	0.815491	0.952815
[R].LTEGNEYVFR.[V]		Ttn-203; A0A0A0MTS7	31810	31819	349xx	64928160	78840408	61950388	61643980	47264008	46611080	61797184	67435648	77124960	59333052	58377600	79413976	67435648	0.672672	0.68761	0.695329	0.844741	1.03838	0.854879	0.770035	0.752951	0.83849	0.810238	0.934171	0.787038	0.810238	0.950381
[K].LIEGHEYQFR.[I]		Ttn-203; A0A0A0MTS7	21366	21375	314xx	73356406	90476592	58643492	56423977	42327021	41910978	5.75337e+07	67401640	71701586	52077485	49707495	71984802	67401640	0.759991	0.789095	0.658212	0.773208	0.929912	0.768676	0.770942	0.752571	0.779528	0.711158	0.79543	0.713411	0.752571	1.02441
[R].VLAENEYGIGLPAETAESVK.[A]		Ttn-203; A0A0A0MTS7	23939	23958	326xx	68185977	81762506	63557264	55538955	43576893	40841406	5.95481e+07	66547747	73293761	54084416	50888743	74535442	66547747	0.706424	0.713095	0.713364	0.76108	0.957371	0.74906	0.731212	0.743037	0.796838	0.738564	0.814333	0.738689	0.743037	0.984086
[K].VLDSPGPPANITVR.[E]		Ttn-203	28188	28201	326xx	65813752	85554448	55051444	65071796	51118120	47382100	60061620	66536984	77912304	63790268	61929992	79504088	66536984	0.681847	0.746167	0.617895	0.891714	1.12305	0.86902	0.807594	0.742917	0.84705	0.871105	0.991017	0.787931	0.84705	0.953419
[K].FTLAVSPVDPPGTPDYIDVTR.[E]		Ttn-203; A0A0A0MTS7	29762	29782	335xx	68783203	87455598	64934143	56656350	42568299	4.18246e+07	6.07952e+07	66299528	76674815	55050757	4.86452e+07	71183913	66299528	0.712612	0.762748	0.728818	0.776392	0.935212	0.767093	0.76492	0.740265	0.833596	0.75176	0.778431	0.705474	0.75176	1.01751
[K].FTLAVSPVDPPGTPDYIDVTR.[E]		Ttn-203; A0A0A0MTS7	29762	29782	336xx	68783203	87455598	64934143	56656350	42568299	4.18246e+07	6.07952e+07	66299528	76674815	55050757	4.86452e+07	71183913	66299528	0.712612	0.762748	0.728818	0.776392	0.935212	0.767093	0.76492	0.740265	0.833596	0.75176	0.778431	0.705474	0.75176	1.01751
[K].SLEVTNIAK.[D]		Ttn-203; A0A0A0MTS7	25738	25746	326xx	66799537	79703342	61365459	56445247	4.29411e+07	4.23066e+07	58905353	66081324	73974639	55864617	52310464	75054467	66081324	0.69206	0.695136	0.688763	0.7735	0.943402	0.775933	0.734318	0.737829	0.804241	0.762874	0.837084	0.743833	0.762874	0.962568
[K].VGVGPTIETK.[T]		Ttn-203; A0A0A0MTS7	19994	20003	304xx	63441108	78575248	61368772	55204048	43174608	40670924	58286410	66077648	70774024	53977996	50397156	71778464	66077648	0.657266	0.685297	0.688801	0.756491	0.948533	0.745933	0.717367	0.737788	0.769444	0.737111	0.806466	0.711366	0.737788	0.972321
[R].VLASNEYGIGLPAETAEPVK.[V]		Ttn-203	27186	27205	326xx	65301673	81794806	56336857	57610609	43675959	4.24129e+07	56973733	66058484	73486903	54407303	52003578	73152526	66058484	0.676542	0.713377	0.632323	0.789469	0.959547	0.777881	0.745629	0.737574	0.798938	0.742973	0.832173	0.724984	0.742973	1.00357
[K].DLPDLCYLAK.[E]	1xCarbamidomethyl [C6]	Ttn-203	21900	21909	320xx	62698392	80345328	59353596	57214672	45987728	43860868	58284134	65979388	77115304	61425728	54270496	72896176	65979388	0.649571	0.700735	0.666182	0.784043	1.01034	0.804439	0.742389	0.736691	0.838385	0.838815	0.868448	0.722443	0.838385	0.885499
[K].VIGLPGPCK.[D]	1xCarbamidomethyl [C8]	Ttn-203; A0A0A0MTS7	16390	16398	270xx	61130016	76770344	55083256	54611680	43638560	41209616	54847468	65833360	75218288	56269532	52106956	75313360	65833360	0.633323	0.669556	0.618252	0.748373	0.958726	0.755813	0.708965	0.735061	0.817761	0.768404	0.833827	0.746399	0.768404	0.922646
[K].VIGLPGPCK.[D]	1xCarbamidomethyl [C8]	Ttn-203; A0A0A0MTS7	16390	16398	271xx	61130016	76770344	55083256	54611680	43638560	41209616	54847468	65833360	75218288	56269532	52106956	75313360	65833360	0.633323	0.669556	0.618252	0.748373	0.958726	0.755813	0.708965	0.735061	0.817761	0.768404	0.833827	0.746399	0.768404	0.922646
[K].LIEGLVVK.[A]		Ttn-203; A0A0A0MTS7	19430	19437	304xx	64949372	78325088	58552760	54920796	44825664	42746580	56736778	65813784	72542680	59049424	53528512	71944960	65813784	0.672892	0.683116	0.657194	0.752609	0.984806	0.784002	0.717862	0.734842	0.788672	0.806365	0.856575	0.713016	0.788672	0.910216
[R].INKDELIR.[Q]		Ttn-203; A0A0A0MTS7	19767	19774	304xx	65094432	77722718	63821582	53813146	42271947	39263373	58817364	65710896	72998544	54254534	49155139	70930864	65710896	0.674395	0.677862	0.716331	0.737431	0.928702	0.720117	0.718224	0.733693	0.793629	0.740887	0.786591	0.702966	0.740887	0.969411
[K].TSCNLNVVPPHVEFLRPLTDLQVK.[E]	1xCarbamidomethyl [C3]	Ttn-203	14277	14300	242xx	62286389	93206210	50999073	58333548	45835289	42531853	5.46663e+07	65708113	76577766	54528847	51853605	70270590	65708113	0.645303	0.812902	0.572412	0.799376	1.00699	0.780064	0.78972	0.733662	0.832541	0.744633	0.829773	0.696422	0.744633	1.06055
[K].TSCNLNVVPPHVEFLRPLTDLQVK.[E]	1xCarbamidomethyl [C3]	Ttn-203	14277	14300	243xx	62286389	93206210	50999073	58333548	45835289	42531853	5.46663e+07	65708113	76577766	54528847	51853605	70270590	65708113	0.645303	0.812902	0.572412	0.799376	1.00699	0.780064	0.78972	0.733662	0.832541	0.744633	0.829773	0.696422	0.744633	1.06055
[K].IGTGPPTESKPVIAK.[T]		Ttn-203; A0A0A0MTS7	20290	20304	304xx	67972108	79216982	62816753	51428184	42377909	40777412	5.71225e+07	65633577	74443462	54437059	51004253	73211822	65633577	0.704208	0.690894	0.705053	0.704748	0.93103	0.747886	0.7049	0.73283	0.809337	0.74338	0.816181	0.725571	0.74338	0.948237
[R].VPGLIEGNEYR.[F]		Ttn-203; A0A0A0MTS7	19780	19790	304xx	69603712	82370352	62784732	54584668	42062440	39989780	58684700	65412916	73358880	52254236	49815368	76546896	65412916	0.721112	0.718397	0.704693	0.748003	0.924099	0.73344	0.727276	0.730366	0.797546	0.713572	0.797156	0.758624	0.758624	0.958678
[R].DPCDPPGRPEAIVITR.[N]	1xCarbamidomethyl [C3]	Ttn-203; A0A0A0MTS7	26515	26530	326xx	67127280	75700736	70143712	56339208	42105928	45177348	61733244	65158152	72176600	56887884	51202000	71773312	65158152	0.695456	0.660227	0.78729	0.772047	0.925054	0.828584	0.779668	0.727521	0.784693	0.776848	0.819346	0.711315	0.776848	1.00363
[K].EQSVLEFR.[V]		Ttn-203; A0A0A0MTS7	29441	29448	335xx	83848784	88425656	89737176	63567132	46439460	4.81787e+07	73707958	65069804	102502416	56692520	56058136	97768440	65069804	0.868695	0.771208	1.00721	0.871095	1.02026	0.883631	0.877363	0.726535	1.11439	0.77418	0.897055	0.968941	0.897055	0.978048
[K].LIQGNEYLFR.[V]		Ttn-203; A0A0A0MTS7	22450	22459	324xx	63428272	81729704	55201836	56656784	48637416	44630672	55929310	65017476	75515272	59260276	55974108	76406704	65017476	0.657133	0.712809	0.619583	0.776398	1.06855	0.818557	0.744604	0.725951	0.82099	0.809244	0.89571	0.757234	0.809244	0.920122
[K].YGIGEPLESEPVVAK.[N]		Ttn-203	28960	28974	332xx	67491480	83393296	59181960	56650500	44657892	41645796	57916230	65004596	73908344	53782300	52682312	74364304	65004596	0.699229	0.727318	0.664256	0.776312	0.98112	0.763813	0.745565	0.725807	0.80352	0.734438	0.843034	0.736993	0.736993	1.01163
[R].INTSAFELNER.[E]		Ttn-203; A0A0A0MTS7	33250	33260	358xx	62524836	77698592	54457292	61220724	46274780	44439160	57839008	64628284	72280216	54422496	53203984	75538920	64628284	0.647773	0.677652	0.611226	0.838941	1.01664	0.815045	0.746348	0.721605	0.785819	0.743181	0.851382	0.748634	0.748634	0.996947
[R].LHEGIEYTFR.[V]		Ttn-203	22054	22063	320xx	64538590	85989488	51448208	51428586	42871426	40981245	51438397	64609736	71383174	54163165	48628452	71881740	64609736	0.668636	0.749961	0.577453	0.704754	0.941872	0.751624	0.727357	0.721398	0.776067	0.739639	0.778163	0.712389	0.739639	0.983394
[K].SSVDLEWSPPLK.[D]		Ttn-203	18349	18360	292xx	66200892	80502424	58910840	57396748	44663400	43219516	58153794	64421460	72302544	55978008	51750224	73323488	64421460	0.685858	0.702105	0.661213	0.786539	0.981241	0.792676	0.744322	0.719296	0.786062	0.764423	0.828118	0.726678	0.764423	0.973705
[K].DSVTLHWDLPLIDGGSR.[I]		Ttn-203; A0A0A0MTS7	22796	22812	326xx	68339334	96168198	45846518	52043481	44392604	42788707	4.8945e+07	64190917	72514054	55072091	51647330	70879400	64190917	0.708013	0.838735	0.51458	0.71318	0.975292	0.784774	0.748977	0.716722	0.788361	0.752052	0.826472	0.702456	0.752052	0.995912
[K].IPFSGKPDPVITWQK.[G]		Ttn-203; A0A0A0MTS7	32963	32977	358xx	68866917	90392596	45468184	53186476	45350633	40135427	49327330	64117795	74720757	56426337	51356922	6.87929e+07	64117795	0.713479	0.788363	0.510333	0.728843	0.99634	0.736111	0.732477	0.715905	0.812352	0.770545	0.821825	0.681778	0.770545	0.950597
[K].IDADIYGKPIPTTQWVK.[G]		Ttn-203	24477	24493	326xx	66223037	81553518	60068946	53552885	40578230	3.87252e+07	5.68109e+07	64060312	78245881	53414438	49999960	73212837	64060312	0.686088	0.711273	0.674211	0.733864	0.891491	0.710247	0.71076	0.715264	0.850677	0.729415	0.80011	0.725581	0.729415	0.974424
[K].VAIQSFR.[G]		Ttn-203	28046	28052	326xx	61517180	74010168	54573092	56933104	42985240	42432608	55753098	64032500	73268856	55470988	53968736	70715456	64032500	0.637334	0.645483	0.612526	0.780185	0.944373	0.778243	0.711863	0.714953	0.796567	0.757499	0.86362	0.700831	0.757499	0.939755
[K].AGDSIVLSAISILGKPLPK.[S]		Ttn-203	22306	22324	324xx	59204288	84674638	46382298	45525489	51185621	47176143	49180882	63657896	70972891	59235168	57765517	74739490	63657896	0.613372	0.738493	0.520593	0.62386	1.12453	0.865243	0.681177	0.71077	0.771606	0.808902	0.924377	0.740711	0.771606	0.882804
[R].FELSSLR.[Y]		Ttn-203	34049	34055	358xx	59654344	76108744	52112412	54391020	44142928	41422028	53251716	63649560	68566392	52836276	50280848	67622752	63649560	0.618034	0.663786	0.584908	0.745349	0.969807	0.759709	0.704568	0.710677	0.745443	0.72152	0.804605	0.67018	0.72152	0.976505
[K].TTGLDEGLEYEFR.[V]		Ttn-203	26480	26492	326xx	63202664	80984240	56684692	58334416	45437020	43770968	57509554	63599532	71492544	53046256	52371828	71398704	63599532	0.654796	0.706308	0.636227	0.799388	0.998237	0.80279	0.752848	0.710119	0.777256	0.724387	0.838066	0.707602	0.724387	1.03929
[K].NTVSLTWNPPK.[Y]		Ttn-203	18645	18655	296xx	62816456	72444864	65277488	62108984	48427356	48464176	62462720	63596204	76018856	59660200	57714468	74166256	63596204	0.650795	0.631831	0.732672	0.851113	1.06393	0.888867	0.791892	0.710082	0.826465	0.814706	0.92356	0.73503	0.814706	0.971998
[R].ATGLIEGLDYQFR.[V]		Ttn-203	29732	29744	335xx	6.26759e+07	8.00045e+07	5.90508e+07	5.4619e+07	4.71552e+07	4.53173e+07	56834904	6.35083e+07	7.24221e+07	5.64516e+07	56101309	73529621	6.35083e+07	0.649339	0.697763	0.662784	0.748474	1.03599	0.83115	0.723118	0.7091	0.787361	0.77089	0.897745	0.728721	0.77089	0.938031
[K].DSVSITWEPPLLDGGSK.[I]		Ttn-203; A0A0A0MTS7	24962	24978	326xx	53440324	77281728	55249272	58536628	47877452	44448388	54344798	63082408	75271888	57948900	59349760	73328856	63082408	0.553655	0.674016	0.620116	0.802159	1.05185	0.815214	0.738087	0.704345	0.818344	0.791337	0.949728	0.726731	0.791337	0.93271
[K].ACDTVFKPGPPGNPR.[V]	1xCarbamidomethyl [C2]	Ttn-203; A0A0A0MTS7	23663	23677	326xx	54312247	74026422	53737054	48749722	3.3777e+07	33160958	51243388	63043088	71483886	47869114	51376337	67508378	63043088	0.562689	0.645625	0.603143	0.668044	0.742071	0.608195	0.62691	0.703906	0.777161	0.653689	0.822135	0.669047	0.703906	0.890616
[R].NSVSLSWEKPEHDGGSR.[I]		Ttn-203; A0A0A0MTS7	23977	23993	326xx	62003856	77745348	5.35585e+07	5.22066e+07	4.15007e+07	3.97929e+07	52882550	62888831	70369976	52618671	4.78404e+07	69782305	62888831	0.642376	0.678059	0.601139	0.715415	0.911759	0.72983	0.696737	0.702183	0.765051	0.718548	0.765552	0.691583	0.718548	0.969646
[K].NFPSHTVYVR.[A]		Ttn-203; A0A0A0MTS7	28394	28403	328xx	64375350	75550812	54170966	55967130	41762458	40940403	55069048	62768482	70473166	48670857	48452988	65312104	62768482	0.666945	0.65892	0.608013	0.766948	0.917508	0.750875	0.70891	0.70084	0.766173	0.664638	0.775355	0.647281	0.70084	1.01152
[K].AVDPIDAPK.[V]		Ttn-203; A0A0A0MTS7	16588	16596	272xx	47614553	75542649	4.26967e+07	5.23209e+07	38106263	36075708	4.51556e+07	6.26841e+07	69470111	5.006e+07	5.13754e+07	67247838	6.26841e+07	0.493299	0.658848	0.479226	0.716982	0.837183	0.661653	0.660251	0.699898	0.755268	0.683608	0.82212	0.666465	0.699898	0.943354
[K].AVDPIDAPK.[V]		Ttn-203; A0A0A0MTS7	16588	16596	273xx	47614553	75542649	4.26967e+07	5.23209e+07	38106263	36075708	4.51556e+07	6.26841e+07	69470111	5.006e+07	5.13754e+07	67247838	6.26841e+07	0.493299	0.658848	0.479226	0.716982	0.837183	0.661653	0.660251	0.699898	0.755268	0.683608	0.82212	0.666465	0.699898	0.943354
[R].VTAVNEYGPGVPTDIPKPVLASDPLSEPDPPR.[K]		Ttn-203	20686	20717	307xx	65620707	8.1344e+07	5.89437e+07	5.81184e+07	4.42153e+07	4.19511e+07	58531026	62533337	73602143	5.21077e+07	4.82487e+07	70524675	62533337	0.679847	0.709446	0.661581	0.796428	0.971396	0.769413	0.739429	0.698214	0.800191	0.711571	0.772086	0.69894	0.711571	1.03915
[R].VTAVNEYGPGVPTDIPKPVLASDPLSEPDPPR.[K]		Ttn-203	20686	20717	308xx	65620707	8.1344e+07	5.89437e+07	5.81184e+07	4.42153e+07	4.19511e+07	58531026	62533337	73602143	5.21077e+07	4.82487e+07	70524675	62533337	0.679847	0.709446	0.661581	0.796428	0.971396	0.769413	0.739429	0.698214	0.800191	0.711571	0.772086	0.69894	0.711571	1.03915
[K].TTGLEEGIEYEFR.[V]		Ttn-203	24316	24328	326xx	63928172	79940608	51126060	50022012	41424916	39561220	50574036	62202056	66304708	49449436	47857004	65596700	62202056	0.662312	0.697205	0.573837	0.685479	0.910093	0.72558	0.691342	0.694515	0.720854	0.67527	0.765818	0.650101	0.694515	0.995431
[K].AEFVCTISK.[E]	1xCarbamidomethyl [C5]	Ttn-203	14483	14491	246xx	4.99574e+07	68179820	50770405	6.05468e+07	4.86586e+07	4.57848e+07	5.03639e+07	6.21908e+07	73995498	6.07807e+07	5.90663e+07	72260729	6.21908e+07	0.517572	0.594633	0.569845	0.829705	1.06901	0.839724	0.712169	0.69439	0.804467	0.830007	0.945191	0.716145	0.804467	0.885268
[R].IDGGQYILR.[A]		Ttn-203; A0A0A0MTS7	25605	25613	326xx	60577000	72340664	54844316	53129092	42595660	40630872	53986704	61963976	71535336	54437552	52304892	70442096	61963976	0.627593	0.630922	0.61557	0.728057	0.935814	0.745198	0.679489	0.691857	0.777721	0.743386	0.836994	0.698122	0.743386	0.914046
[K].LLLQAAPQFHPGYPLK.[E]		Ttn-203	32534	32549	355xx	62209080	80800400	49858532	51565608	43032464	37883208	50712070	61956088	66946192	52226200	46620900	69796688	61956088	0.644502	0.704704	0.55961	0.706631	0.94541	0.694804	0.699754	0.691769	0.727828	0.713189	0.746038	0.691725	0.713189	0.981163
[R].YSIQNTDSSSLLVIPQVTR.[N]		Ttn-203	29232	29250	335xx	64197938	77286368	57746371	55599728	43773720	41594400	5.6673e+07	61885648	68912048	51174067	50798557	69453928	61885648	0.665107	0.674056	0.648143	0.761913	0.961695	0.76287	0.717985	0.690982	0.749201	0.698821	0.81289	0.688328	0.698821	1.02742
[R].VGESFALTGR.[Y]		Ttn-203	18746	18755	297xx	59587940	71542968	61197440	54603800	43818068	40910516	57095870	61742796	70789264	53982584	51731084	70849552	61742796	0.617346	0.623965	0.686878	0.748265	0.96267	0.750327	0.717571	0.689387	0.76961	0.737174	0.827812	0.70216	0.737174	0.973409
[R].ITIENVPK.[K]		Ttn-203; A0A0A0MTS7	15651	15658	261xx	6.60893e+07	71781880	NA	57636662	40941112	48344172	57636662	61661804	67183168	52689596	49431512	69433552	61661804	0.684703	0.626049		0.789826	0.899464	0.886666	0.789826	0.688483	0.730405	0.719517	0.791014	0.688126	0.719517	1.09772
[R].DEIDAPNASLDPK.[Y]		Ttn-203; A0A0A0MTS7	26614	26626	326xx	59552964	68159304	58784272	57219696	45570524	45069752	58001984	61472264	70841992	53166640	54538924	71375520	61472264	0.616984	0.594454	0.659792	0.784112	1.00117	0.82661	0.721952	0.686367	0.770183	0.726031	0.872744	0.707372	0.726031	0.994382
[K].IGGGEYIELK.[N]		Ttn-203	16473	16482	271xx	59836900	74167152	51635080	51565344	41440684	39137244	51600212	61423576	66813852	52051468	49902456	66839200	61423576	0.619926	0.646852	0.57955	0.706628	0.910439	0.717804	0.67674	0.685823	0.72639	0.710803	0.79855	0.662415	0.710803	0.952078
[K].TCEIEIGQLK.[E]	1xCarbamidomethyl [C2]	Ttn-203	29431	29440	335xx	62011708	78291880	54302344	53449372	45775968	41203276	53875858	61399660	67872224	56633564	49836640	70459128	61399660	0.642457	0.682826	0.609487	0.732446	1.00568	0.755697	0.707636	0.685556	0.737896	0.773375	0.797497	0.69829	0.737896	0.958991
[R].VNVENTATSTILNINECVR.[S]	1xCarbamidomethyl [C17]	Ttn-203	23026	23044	326xx	59592252	74271500	53776942	50829838	42461614	38748557	52303390	61385086	65839870	51222140	48683080	64568580	61385086	0.617391	0.647762	0.60359	0.696549	0.932869	0.710675	0.672155	0.685393	0.715801	0.699478	0.779037	0.639912	0.699478	0.960939
[R].DENVPPTVEFGPEYFDGLVIK.[S]		Ttn-203	29865	29885	336xx	63286022	83412612	54524955	53166615	41766215	40690109	53845785	61298738	71382810	53610010	51928994	71603568	61298738	0.655659	0.727487	0.611986	0.728571	0.917591	0.746285	0.728029	0.684429	0.776063	0.732086	0.830979	0.709633	0.732086	0.994458
[R].DENVPPTVEFGPEYFDGLVIK.[S]		Ttn-203	29865	29885	337xx	63286022	83412612	54524955	53166615	41766215	40690109	53845785	61298738	71382810	53610010	51928994	71603568	61298738	0.655659	0.727487	0.611986	0.728571	0.917591	0.746285	0.728029	0.684429	0.776063	0.732086	0.830979	0.709633	0.732086	0.994458
[K].ADEEEWQIVTPQTGLR.[V]		Ttn-203; A0A0A0MTS7	25875	25890	326xx	53324740	71894554	51139875	57130078	47115423	43378852	5.22323e+07	61269386	71803226	56204368	54336323	72303348	61269386	0.552458	0.627031	0.573992	0.782884	1.03511	0.795598	0.704958	0.684102	0.780633	0.767514	0.869502	0.716568	0.767514	0.918495
[K].YQFDPPGPPTR.[L]		Ttn-203; A0A0A0MTS7	15792	15802	262xx	63091324	75268168	57856332	55195196	40762204	39378240	56525764	61219580	69630512	50333544	48062016	66862272	61219580	0.653642	0.656455	0.649377	0.75637	0.895533	0.722224	0.689339	0.683545	0.757012	0.687343	0.769099	0.662644	0.687343	1.0029
[K].YQFDPPGPPTR.[L]		Ttn-203; A0A0A0MTS7	15792	15802	263xx	63091324	75268168	57856332	55195196	40762204	39378240	56525764	61219580	69630512	50333544	48062016	66862272	61219580	0.653642	0.656455	0.649377	0.75637	0.895533	0.722224	0.689339	0.683545	0.757012	0.687343	0.769099	0.662644	0.687343	1.0029
[K].YSLTLVNPAGEK.[A]		Ttn-203; A0A0A0MTS7	20590	20601	306xx	62541124	72784504	57947072	54940296	43317636	39259176	56443684	60874884	68648088	51939812	49896760	66499152	60874884	0.647942	0.634793	0.650396	0.752876	0.951675	0.72004	0.685218	0.679697	0.746331	0.709278	0.798459	0.659045	0.709278	0.966078
[K].EIIADGLK.[Y]		Ttn-203; A0A0A0MTS7	32881	32888	357xx	56993765	70749340	56777704	57618862	44084690	40643726	5.68857e+07	60817098	74423552	57033372	55292656	73193416	60817098	0.59047	0.617043	0.637271	0.789582	0.968527	0.745434	0.691352	0.679052	0.809121	0.778834	0.884805	0.725389	0.778834	0.887676
[K].AVNEAGVSKPSATVGPVIVK.[D]		Ttn-203	18007	18026	288xx	63913228	72161284	62154774	48256084	40610443	38248204	55205429	60653113	69440532	52566888	49952630	73307686	60653113	0.662157	0.629358	0.697623	0.661279	0.892199	0.701499	0.67989	0.677221	0.754946	0.717841	0.799353	0.726521	0.726521	0.935816
[K].TELSIPK.[A]		Ttn-203; A0A0A0MTS7	17374	17380	280xx	56047700	65127072	59249664	52185724	37375152	37407168	54116712	60422152	66913772	52185260	46845588	64680544	60422152	0.580669	0.568009	0.665016	0.715129	0.821121	0.686073	0.675545	0.674642	0.727476	0.71263	0.749633	0.641021	0.71263	0.94796
[K].ATLTWTPPLEDGGSPIK.[SA]		Ttn-203; A0A0A0MTS7	22403	22419	324xx	58069572	73138040	50392628	52462148	43396656	40414668	51427388	60357900	68784544	53209848	50720544	69912568	60357900	0.601616	0.637877	0.565605	0.718917	0.953411	0.741233	0.678397	0.673924	0.747815	0.726621	0.811641	0.692874	0.726621	0.933632
[K].VVGKPGIPTGPIK.[F]		Ttn-203; A0A0A0MTS7	21986	21998	320xx	62956590	78752088	45194959	50218934	42442398	3.84961e+07	4.77069e+07	60261883	70340402	52578978	49922178	67952604	60261883	0.652246	0.68684	0.507266	0.688177	0.932446	0.706045	0.687508	0.672852	0.76473	0.718006	0.798866	0.673449	0.718006	0.957524
[K].VVIQDPYR.[L]		Ttn-203; A0A0A0MTS7	17504	17511	282xx	61959804	73783504	56675012	54100240	41253008	40036716	55387626	60195544	69609432	52905428	48438776	67564680	60195544	0.641919	0.643506	0.636118	0.741365	0.906316	0.734301	0.688904	0.672112	0.756783	0.722464	0.775128	0.669605	0.722464	0.953547
[K].LYPPSPPR.[W]		Ttn-203; A0A0A0MTS7	15995	16002	265xx	59569100	71818592	60653464	53076696	40296408	40083808	56322898	60183216	68720912	52741892	49677840	69493536	60183216	0.617151	0.626369	0.680772	0.727339	0.8853	0.735165	0.704055	0.671974	0.747123	0.720231	0.794956	0.688721	0.720231	0.977541
[K].LYPPSPPR.[W]		Ttn-203; A0A0A0MTS7	15995	16002	266xx	59569100	71818592	60653464	53076696	40296408	40083808	56322898	60183216	68720912	52741892	49677840	69493536	60183216	0.617151	0.626369	0.680772	0.727339	0.8853	0.735165	0.704055	0.671974	0.747123	0.720231	0.794956	0.688721	0.720231	0.977541
[K].VTNDNLLSR.[K]		Ttn-203; A0A0A0MTS7	18680	18688	296xx	60645172	66065320	57472516	52945620	39301348	39967628	55209068	60063216	62016644	50728528	47152184	67614112	60063216	0.628299	0.576192	0.645069	0.725542	0.863439	0.733034	0.685306	0.670634	0.674235	0.692737	0.75454	0.670095	0.674235	1.01642
[K].SSISLAWKPPAK.[D]		Ttn-203	17633	17644	283xx	50827176	81472578	47192496	57494895	48375419	42622705	4.96013e+07	52715740	77869292	60197101	56031221	60039828	60039828	0.526583	0.710567	0.529687	0.787884	1.06279	0.78173	0.746148	0.588596	0.846583	0.822037	0.896624	0.595029	0.822037	0.907682
[K].LTWFSPEDDGGSPITNYVIQK.[R]		Ttn-203	18549	18569	295xx	59415042	79880114	33544412	50225695	39291609	35945135	44758652	60032786	70126136	50172606	50702412	66746110	60032786	0.615555	0.696678	0.376501	0.68827	0.863225	0.659259	0.673764	0.670294	0.7624	0.685145	0.811351	0.661492	0.685145	0.983389
[R].VGTGEPVETDSPVEAR.[S]		Ttn-203	15084	15099	252xx	56084112	70884952	51156980	50084780	38291144	38302064	50620880	59794112	62836516	48452320	47810668	64239280	59794112	0.581046	0.618226	0.574184	0.686339	0.841245	0.702486	0.652282	0.667629	0.683149	0.661654	0.765077	0.636648	0.667629	0.977013
[R].ITQFVVPDLQTK.[E]		Ttn-203; A0A0A0MTS7	22644	22655	326xx	62142696	69426328	60031556	50282764	38254048	38085612	55157160	59647668	68990560	49037676	46912940	67945944	59647668	0.643814	0.605505	0.673792	0.689052	0.84043	0.698516	0.681422	0.665994	0.750054	0.669647	0.750711	0.673383	0.673383	1.01194
[K].IIEFGQAR.[Q]		Ttn-203; A0A0A0MTS7	33303	33310	358xx	56025948	67524024	50965184	51422904	41328148	37499432	51194044	59588460	65723292	51539532	48353104	65622632	59588460	0.580443	0.588914	0.572031	0.704676	0.907967	0.687766	0.63834	0.665333	0.714533	0.703812	0.773757	0.650358	0.703812	0.906975
[R].QLGVPVIAK.[D]		Ttn-203	27295	27303	326xx	58465744	70389808	55255268	52148076	37807888	37855468	53701672	59421004	64746868	49032112	48013148	64425536	59421004	0.60572	0.613908	0.620183	0.714613	0.830628	0.694295	0.657239	0.663464	0.703918	0.669571	0.768317	0.638494	0.669571	0.981583
[K].AGSSPPSKPTEYVTAR.[M]		Ttn-203; A0A0A0MTS7	21086	21101	311xx	55831491	69726226	48790773	49217359	40950656	37030514	49004066	59135593	68059000	51781658	48359022	64566922	59135593	0.578429	0.60812	0.547626	0.674452	0.899673	0.679165	0.641286	0.660277	0.739927	0.707118	0.773852	0.639895	0.707118	0.906901
[K].NLDCVVTGLQQGK.[T]	1xCarbamidomethyl [C4]	Ttn-203	19378	19390	303xx	59167312	72022936	53874040	51445580	42306016	39096916	52659810	59070912	66963724	50587048	49064364	70054576	59070912	0.612988	0.628151	0.60468	0.704986	0.92945	0.717064	0.666569	0.659555	0.728019	0.690805	0.785139	0.694281	0.694281	0.960085
[K].LITGNEYQFR.[I]		Ttn-203	30030	30039	338xx	55829940	72366112	51534760	50988588	40124156	39659908	51261674	59042800	67272848	52801212	50782472	67709872	59042800	0.578412	0.631144	0.578424	0.698724	0.881515	0.72739	0.664934	0.659241	0.73138	0.721041	0.812632	0.671044	0.721041	0.922186
[K].NLANLEVSEGDTIK.[L]		Ttn-203	14382	14395	245xx	58028428	72760336	54930740	54810796	36910256	38948156	54870768	58817716	63221896	45496324	42920880	62108396	58817716	0.601189	0.634582	0.61654	0.751102	0.810907	0.714336	0.674459	0.656728	0.687338	0.621287	0.686829	0.61553	0.656728	1.027
[K].GQSDPVTIGPLTVK.[E]		Ttn-203	29456	29469	335xx	64216088	78059896	60297440	48686568	38586320	36854684	54492004	58791060	66044376	48768752	47272328	68139440	58791060	0.665295	0.680803	0.676776	0.667178	0.84773	0.67594	0.676358	0.65643	0.718024	0.665975	0.756462	0.675301	0.675301	1.00157
[K].VAEVPQPPGK.[I]		Ttn-203; A0A0A0MTS7	25041	25050	326xx	62767588	73190784	58999136	50933020	39997248	38448200	54966078	58515800	70684296	49216416	48233964	68270720	58515800	0.650288	0.638337	0.662204	0.697963	0.878727	0.705167	0.680083	0.653357	0.768468	0.672088	0.771851	0.676602	0.676602	1.00515
[K].VSELTEGVPYYFR.[V]		Ttn-203	30423	30435	339xx	62932072	82025608	41473276	57042876	44529904	42050324	50786390	59916776	72539936	51669468	51238844	58456960	58456960	0.651992	0.71539	0.465494	0.781689	0.978308	0.771232	0.743311	0.668999	0.788643	0.705586	0.819935	0.579342	0.705586	1.05347
[R].DPIYPPDPPIK.[L]		Ttn-203; A0A0A0MTS7	17921	17931	287xx	59004788	69416560	55689852	51842052	43482196	18166146	53765952	58449640	67232960	54063920	52699440	70698728	58449640	0.611305	0.60542	0.625061	0.71042	0.955291	0.33318	0.618183	0.652618	0.730946	0.738284	0.843308	0.700665	0.730946	0.84573
[R].DPIYPPDPPIK.[L]		Ttn-203; A0A0A0MTS7	17921	17931	288xx	59004788	69416560	55689852	51842052	43482196	18166146	53765952	58449640	67232960	54063920	52699440	70698728	58449640	0.611305	0.60542	0.625061	0.71042	0.955291	0.33318	0.618183	0.652618	0.730946	0.738284	0.843308	0.700665	0.730946	0.84573
[R].NAAHEDGGIYSLTVENPAGTK.[T]		Ttn-203	19192	19212	301xx	62161886	76358577	51722043	48799334	36955853	3.65912e+07	5.02607e+07	58321985	61712891	4.70533e+07	43203167	62568675	58321985	0.644013	0.665965	0.580526	0.668724	0.811909	0.671109	0.667344	0.651192	0.670933	0.642549	0.691347	0.620092	0.651192	1.0248
[K].STDFATSLSVK.[D]		Ttn-203; A0A0A0MTS7	24508	24518	326xx	54741432	69039680	50338644	48895420	38790604	38340500	49617032	58287744	61854352	48489696	45551480	65700324	58287744	0.567135	0.602133	0.564999	0.67004	0.852218	0.703191	0.636086	0.65081	0.672471	0.662164	0.728925	0.651128	0.662164	0.960618
[R].LDDQANFNVSLTNHR.[G]		Ttn-203	14617	14631	247xx	56629855	71897604	48709768	51756222	36650792	36550071	50232995	58234590	65012850	49915242	48304906	63151661	58234590	0.5867	0.627058	0.546717	0.709243	0.805207	0.670354	0.648706	0.650217	0.706809	0.681631	0.772986	0.625869	0.681631	0.951697
[K].DLVIEPDVRPAFSSYSVQVGQDLK.[I]		Ttn-203	25139	25162	326xx	61236102	72277992	5.36012e+07	50517584	36596178	36919950	5.20594e+07	58158609	71671496	50263270	46591105	63572381	58158609	0.634422	0.630376	0.601618	0.69227	0.804007	0.677137	0.65578	0.649368	0.779201	0.686383	0.745561	0.630039	0.686383	0.955413
[K].VTGLVEGLEYQFR.[T]		Ttn-203; A0A0A0MTS7	30816	30828	340xx	5.41306e+07	7.55274e+07	4.78342e+07	4.85613e+07	4.25861e+07	4.06301e+07	4.81977e+07	58070669	63200132	51930555	49822113	6.61549e+07	58070669	0.560807	0.658716	0.536889	0.665461	0.935603	0.745185	0.662089	0.648386	0.687102	0.709151	0.797264	0.655633	0.687102	0.963596
[R].VFAENQAGLSDPR.[E]		Ttn-203; A0A0A0MTS7	28361	28373	327xx	56276116	67482904	51673496	52571656	38363832	37250024	52122576	58038060	65055476	47191176	48099172	65820032	58038060	0.583035	0.588555	0.579981	0.720418	0.842842	0.683191	0.635873	0.648022	0.707273	0.644432	0.769694	0.652314	0.652314	0.974795
[K].LTSGEAPGVR.[K]		Ttn-203	32441	32450	354xx	64331604	59060104	85314976	57668844	41104980	47482652	58364474	57936708	66145112	45056836	45263584	63475276	57936708	0.666492	0.515095	0.957572	0.790267	0.903064	0.870865	0.830566	0.646891	0.719119	0.615286	0.724318	0.629077	0.646891	1.28394
[K].LTSGEAPGVR.[K]		Ttn-203	32441	32450	355xx	64331604	59060104	85314976	57668844	41104980	47482652	58364474	57936708	66145112	45056836	45263584	63475276	57936708	0.666492	0.515095	0.957572	0.790267	0.903064	0.870865	0.830566	0.646891	0.719119	0.615286	0.724318	0.629077	0.646891	1.28394
[K].ITVDDVTR.[N]		Ttn-203; A0A0A0MTS7	25051	25058	326xx	55665512	64045336	50951008	48167896	36550216	35695072	49559452	57876844	61951984	48672836	44039812	61707428	57876844	0.576709	0.558574	0.571872	0.660071	0.802997	0.654672	0.615691	0.646222	0.673532	0.664665	0.704735	0.611556	0.664665	0.926317
[R].VIIENVGTK.[S]		Ttn-203	17064	17072	277xx	60552088	70479432	55814512	50747056	37650148	37596976	53280784	57855212	66475284	50556088	46867840	69093256	57855212	0.627335	0.614689	0.62646	0.695414	0.827162	0.689555	0.658445	0.645981	0.722709	0.690382	0.749989	0.684754	0.690382	0.95374
[R].YGVGPGITSASVVANYPFK.[V]		Ttn-203	23153	23171	326xx	6.39821e+07	77575503	5.33919e+07	48989613	3.846e+07	35595839	5.11907e+07	57779809	66261338	47343762	4.42292e+07	6.47084e+07	57779809	0.662871	0.676578	0.599268	0.671331	0.844954	0.652852	0.667101	0.645139	0.720383	0.646515	0.707766	0.641298	0.646515	1.03184
[R].ELAESVIAK.[D]		Ttn-203; A0A0A0MTS7	19806	19814	304xx	52390104	65767744	50891092	47486216	37981348	34602264	49188654	57404044	62312144	49346248	44878900	61278000	57404044	0.542775	0.573596	0.5712	0.650729	0.834439	0.634629	0.604113	0.640943	0.677448	0.673861	0.718162	0.6073	0.673861	0.896495
[R].QLSVPVIAK.[D]		Ttn-203; A0A0A0MTS7	24048	24056	326xx	57181240	67925744	55544836	52221412	38766772	37695176	53883124	57343528	65623772	49412384	46656528	65777536	57343528	0.592412	0.592417	0.623433	0.715618	0.851694	0.691356	0.657394	0.640268	0.713451	0.674764	0.746608	0.651893	0.674764	0.974258
[K].GRPEPDITWSK.[E]		Ttn-203	19848	19858	304xx	61783390	75364810	50790106	43659102	35590054	32772122	47224604	57172910	60709364	47278292	41499507	61555120	57172910	0.640092	0.657297	0.570066	0.598284	0.781903	0.601063	0.620578	0.638363	0.660023	0.645621	0.664084	0.610047	0.645621	0.96121
[K].AADPIDPPGPPAK.[I]		Ttn-203; A0A0A0MTS7	29074	29086	333xx	58613860	69469664	57120008	46883252	36998512	35292832	52001630	57148380	62682376	46967056	45813156	63878820	57148380	0.607255	0.605883	0.641113	0.642466	0.812846	0.647295	0.64179	0.638089	0.681473	0.641371	0.733112	0.633076	0.641371	1.00065
[K].AADPIDPPGPPAK.[I]		Ttn-203; A0A0A0MTS7	29074	29086	334xx	58613860	69469664	57120008	46883252	36998512	35292832	52001630	57148380	62682376	46967056	45813156	63878820	57148380	0.607255	0.605883	0.641113	0.642466	0.812846	0.647295	0.64179	0.638089	0.681473	0.641371	0.733112	0.633076	0.641371	1.00065
[R].LVENTEYEFR.[V]		Ttn-203	30522	30531	339xx	55517512	67305120	52542852	50936096	39087300	37520872	51739474	57027004	63381096	51694584	47479568	64315600	57027004	0.575176	0.587004	0.589739	0.698005	0.858736	0.688159	0.638949	0.636733	0.689069	0.705929	0.759778	0.637405	0.689069	0.927264
[R].GPFVETPKPIK.[A]		Ttn-203; A0A0A0MTS7	19306	19316	302xx	71077082	85660202	54617060	3.98899e+07	32549962	29173216	4.72535e+07	57009866	62153432	45221365	40787092	64123138	57009866	0.736377	0.747089	0.61302	0.546633	0.715113	0.535057	0.664066	0.636542	0.675722	0.617532	0.652684	0.635497	0.636542	1.04324
[K].YTVILDNAVCR.[IN]	1xCarbamidomethyl [C10]	Ttn-203; A0A0A0MTS7	29548	29558	335xx	54347780	69611048	52962840	45385756	39567972	38095768	49174298	56900636	61347952	48308460	45173512	61967420	56900636	0.563057	0.607116	0.594453	0.621945	0.869296	0.698703	0.614531	0.635322	0.666965	0.659689	0.722876	0.614133	0.659689	0.931546
[K].ALDPFTTPSPPTSLEITSVTK.[D]		Ttn-203	27890	27910	326xx	60342290	71766733	56485746	48972352	3.71398e+07	36337970	52729049	56879404	65280327	46888313	46122530	66737797	56879404	0.625162	0.625917	0.633994	0.671095	0.815949	0.666464	0.650229	0.635085	0.709717	0.640296	0.738063	0.66141	0.66141	0.983095
[K].VCNAVVSGLSSGQEYQFR.[V]	1xCarbamidomethyl [C2]	Ttn-203	26181	26198	326xx	54385152	62515676	61589473	51158064	39956037	35871992	52771608	56818938	83976818	48523398	49618031	68074242	56818938	0.563444	0.545233	0.691278	0.701047	0.877822	0.657917	0.674597	0.63441	0.912983	0.662624	0.793999	0.674655	0.674655	0.999915
[K].GVEFNVPR.[L]		Ttn-203; A0A0A0MTS7	17574	17581	282xx	62001096	69835072	54643836	45374984	36359708	34574952	50009410	56455372	63401032	49924532	44284232	63021212	56455372	0.642347	0.60907	0.61332	0.621798	0.798812	0.634129	0.627963	0.630351	0.689286	0.681758	0.708646	0.624576	0.681758	0.921094
[R].YQEGVFVR.[Q]		Ttn-203	32056	32063	352xx	55414248	68350784	51274384	48114484	37546824	36616600	49694434	56435920	60735780	47557732	45314440	63532256	56435920	0.574106	0.596124	0.575502	0.659339	0.824892	0.671574	0.627731	0.630134	0.66031	0.649437	0.725132	0.629641	0.649437	0.966578
[K].LGVTSVSK.[D]		Ttn-203	28295	28302	327xx	56266478	65798143	54719552	49297957	38044023	3.67082e+07	5.20088e+07	56368184	64495649	4.9041e+07	45905034	66188399	56368184	0.582935	0.573861	0.61417	0.675556	0.835816	0.673253	0.643712	0.629377	0.701186	0.669693	0.734582	0.655965	0.669693	0.961204
[R].ESGTTAWQLINSSVK.[R]		Ttn-203	30696	30710	339xx	52651828	79421744	44217476	49460504	36145104	35977056	46838990	56348984	62914752	48698316	44179556	60425444	56348984	0.545486	0.69268	0.496295	0.677784	0.794097	0.659844	0.668814	0.629163	0.683999	0.665013	0.706971	0.598851	0.665013	1.00572
[R].YTVINLFGK.[T]		Ttn-203; A0A0A0MTS7	33093	33101	358xx	51208308	75673752	37911652	43513748	41044472	35764224	42279110	56312124	60935752	50264496	43528760	58205524	56312124	0.530531	0.659992	0.425519	0.596292	0.901734	0.655941	0.626116	0.628751	0.662484	0.6864	0.696557	0.57685	0.662484	0.945105
[K].VTGLQEGNTYEFR.[V]		Ttn-203	22547	22559	325xx	57147880	65812208	50638624	51301176	40383232	39124896	50969900	56190844	62809788	46835288	47566012	64976276	56190844	0.592067	0.573984	0.568366	0.703008	0.887207	0.717578	0.647537	0.627397	0.682858	0.639572	0.761162	0.643952	0.643952	1.00557
[K].ADGSSVLIIK.[D]		Ttn-203	20864	20873	309xx	46100044	67870719	45733444	48389961	38089594	29851616	45916744	56009108	62551529	50035106	46087757	62504463	56009108	0.477608	0.591937	0.51331	0.663114	0.836817	0.547499	0.569718	0.625368	0.68005	0.683268	0.737506	0.619455	0.68005	0.837759
[K].LGSATASINVK.[V]		Ttn-203; A0A0A0MTS7	16379	16389	270xx	52940412	66115016	48371816	47863952	38084468	36354036	48117884	55746004	61030028	49657356	46507184	61614120	55746004	0.548476	0.576625	0.542923	0.655906	0.836704	0.666758	0.616265	0.62243	0.663509	0.678109	0.744218	0.610631	0.663509	0.928797
[K].RPTDDGGSEITGYHVER.[R]		Ttn-203	22508	22524	325xx	62986368	76713005	4.51304e+07	4.64225e+07	3.43812e+07	32470638	4.57764e+07	5.7955e+07	6.18091e+07	41351293	3.91597e+07	55656383	55656383	0.652555	0.669056	0.506542	0.636152	0.755344	0.595534	0.644353	0.647095	0.671979	0.564684	0.626642	0.551587	0.626642	1.02826
[R].VAAENAIGQSDYTEIGDSVLAK.[D]		Ttn-203	16071	16092	266xx	62692760	71543558	54254790	47637772	3.73765e+07	35237905	50946281	55615250	62130182	46308496	42725517	62583318	55615250	0.649513	0.62397	0.608954	0.652806	0.821151	0.646288	0.6479	0.62097	0.675469	0.632378	0.683703	0.620237	0.632378	1.02455
[K].INADIAGRPLPVISWAK.[D]		Ttn-203; A0A0A0MTS7	27723	27739	326xx	53817762	66704638	4.71196e+07	48944909	43636049	3.94626e+07	4.80323e+07	55590670	65528593	53982953	49733258	66503840	55590670	0.557566	0.581767	0.528869	0.670718	0.958671	0.723772	0.626243	0.620696	0.712416	0.737179	0.795843	0.659091	0.712416	0.87904
[R].DTGEYTLELK.[N]		Ttn-203; A0A0A0MTS7	31719	31728	348xx	55660600	62175260	51557056	50052692	38482996	37664928	50804874	55569848	61598684	49625668	44073748	61968076	55569848	0.576658	0.542264	0.578674	0.685899	0.84546	0.690801	0.632287	0.620464	0.669691	0.677676	0.705278	0.614139	0.669691	0.944147
[R].AENEAGVGHPSEPTEILSIEDPTSPPSPPLDLHVTDAGR.[K]		Ttn-203; A0A0A0MTS7	16174	16212	268xx	48693719	85748286	31493143	46841445	42048831	3.66906e+07	44445138	63865108	55357137	48484289	4.2163e+07	60316574	55357137	0.504479	0.747857	0.353478	0.641894	0.9238	0.67293	0.657412	0.713084	0.601834	0.66209	0.674702	0.597772	0.66209	0.992934
[R].AENEAGVGHPSEPTEILSIEDPTSPPSPPLDLHVTDAGR.[K]		Ttn-203; A0A0A0MTS7	16174	16212	269xx	48693719	85748286	31493143	46841445	42048831	3.66906e+07	44445138	63865108	55357137	48484289	4.2163e+07	60316574	55357137	0.504479	0.747857	0.353478	0.641894	0.9238	0.67293	0.657412	0.713084	0.601834	0.66209	0.674702	0.597772	0.66209	0.992934
[R].ADSCEFTVTGLQK.[G]	1xCarbamidomethyl [C4]	Ttn-203	15057	15069	252xx	49446624	62329160	4.55252e+07	46964656	39341640	34939656	4.62449e+07	55335742	60273992	46638908	44804880	60708508	55335742	0.51228	0.543606	0.510973	0.643582	0.864324	0.640817	0.592212	0.61785	0.655289	0.63689	0.716978	0.601656	0.63689	0.92985
[K].VTGLTEGCEYFFR.[V]	1xCarbamidomethyl [C8]	Ttn-203	22842	22854	326xx	53869600	72795888	44631604	50290740	42433324	38967584	47461172	55143884	64780940	52514436	47852776	62640960	55143884	0.558103	0.634892	0.500943	0.689161	0.932247	0.714692	0.662027	0.615707	0.704288	0.717125	0.765751	0.620808	0.704288	0.939994
[R].TYALNAAGVSK.[A]		Ttn-203; A0A0A0MTS7	30829	30839	340xx	51963277	62530171	5.00767e+07	47068234	3.61752e+07	3.50065e+07	4.85724e+07	5.48616e+07	61364895	4.57325e+07	44962733	61803992	5.48616e+07	0.538353	0.54536	0.562059	0.645001	0.794757	0.642044	0.602051	0.612556	0.667149	0.624513	0.719504	0.612513	0.624513	0.964033
[K].SAFVNVR.[V]		Ttn-203; A0A0A0MTS7	23855	23861	326xx	50704868	61100588	42000564	48485796	36383584	34383996	45243180	54507128	58091236	46310864	40911120	54899492	54507128	0.525315	0.532891	0.471413	0.664427	0.799336	0.630626	0.581759	0.608598	0.631559	0.63241	0.654669	0.544086	0.631559	0.921148
[K].ACDPVFKPGPPTNAHVVDTTK.[N]	1xCarbamidomethyl [C2]	Ttn-203	25827	25847	326xx	62469054	76341172	44697283	37055350	32441408	31862961	4.08763e+07	54497624	62381376	46505813	41772324	68545718	54497624	0.647195	0.665813	0.501681	0.507789	0.712728	0.584389	0.615792	0.608492	0.6782	0.635072	0.66845	0.679327	0.66845	0.921224
[K].TVDTTAEQTSFR.[I]		Ttn-203	14958	14969	251xx	47664004	60460788	46272892	46797896	36552692	33656720	46535394	54100144	59058804	41739568	43085460	58131016	54100144	0.493811	0.527311	0.519365	0.641297	0.803051	0.617288	0.572299	0.604054	0.642078	0.569986	0.689463	0.576112	0.604054	0.947432
[K].TSVTLTWEPPLLDGGSK.[I]		Ttn-203	23880	23896	326xx	50405416	67894144	51293288	44180008	36040488	35807056	47292712	54027700	59798120	44715524	44215532	68153568	54027700	0.522213	0.592142	0.575714	0.605422	0.791798	0.656726	0.598782	0.603245	0.650116	0.610625	0.707547	0.675441	0.650116	0.921039
[K].GVPFPTLTWFK.[A]		Ttn-203; A0A0A0MTS7	18056	18066	289xx	56833884	82483656	44688792	47829948	34745228	33410096	46259370	53980876	66177608	43022828	42718588	61404088	53980876	0.588814	0.719385	0.501585	0.65544	0.763342	0.612764	0.634102	0.602722	0.719472	0.58751	0.683592	0.60855	0.60855	1.04199
[K].FKVEEGIVPDKEYVLR.[V]		Ttn-203	16258	16273	269xx	5.9343e+07	67458990	48802078	4.42669e+07	3.24691e+07	32014569	4.65345e+07	5.39738e+07	6.06583e+07	43181550	37985405	57454990	5.39738e+07	0.614808	0.588346	0.547753	0.606613	0.713336	0.587169	0.59748	0.602643	0.659467	0.589677	0.607851	0.569412	0.602643	0.991432
[K].ENVEYHFR.[V]		Ttn-203; A0A0A0MTS7	32208	32215	352xx	48399640	67727812	37594568	44029158	35777920	33685232	40811863	53904264	56599266	42469106	40777662	56663852	53904264	0.501433	0.590691	0.42196	0.603355	0.78603	0.61781	0.597023	0.601867	0.615338	0.579948	0.652533	0.561571	0.601867	0.991953
[R].LTTGSEYQFR.[V]		Ttn-203; A0A0A0MTS7	27465	27474	326xx	50668320	64108504	45469164	46556860	36427156	36536708	46013012	53899048	60633092	46566512	46744716	64434040	53899048	0.524937	0.559125	0.510344	0.637994	0.800293	0.670108	0.598559	0.601808	0.659193	0.635901	0.748019	0.638578	0.638578	0.937331
[R].VSGENEFGVGVPAETK.[E]		Ttn-203	28265	28280	326xx	55386848	66866408	5.13056e+07	49944324	37250632	34267276	5.0625e+07	53826424	60700024	43907872	44731168	64128480	53826424	0.573822	0.583178	0.575852	0.684414	0.818385	0.628486	0.605832	0.600997	0.659921	0.599596	0.715798	0.63555	0.63555	0.95324
[K].EPLDDGGSVVTNYVVER.[K]		Ttn-203	19246	19262	302xx	5.52283e+07	69616907	3.96416e+07	51046121	40394863	38776135	45720492	53763667	62412913	47936343	46368296	53898547	53763667	0.572179	0.607167	0.444936	0.699512	0.887463	0.711181	0.65334	0.600297	0.678543	0.654607	0.741996	0.534166	0.654607	0.998063
[K].EISILNIAR.[H]		Ttn-203; A0A0A0MTS7	33209	33217	358xx	49235508	67715256	42533612	44434464	39766932	36686824	43484038	53745768	59192724	50281240	47093556	62111372	53745768	0.510092	0.590582	0.477396	0.608909	0.873667	0.672862	0.599745	0.600097	0.643534	0.686629	0.753601	0.615559	0.643534	0.931956
[K].VGLGEAASVPGTVKPEDK.[L]		Ttn-203	25915	25932	326xx	51101293	69158488	43154949	42244268	3.34869e+07	33127196	4.26996e+07	53707113	56777159	4.35621e+07	42807968	56809553	53707113	0.529422	0.603169	0.484369	0.578896	0.735697	0.607576	0.591032	0.599665	0.617272	0.594874	0.685023	0.563015	0.599665	0.985604
[R].TSELEAASSVR.[E]		Ttn-203	34416	34426	358xx	52813392	57470856	48978432	44082056	35218236	36005640	46530244	55007568	53627316	40925376	41188424	54867972	53627316	0.54716	0.501235	0.549732	0.60408	0.773734	0.660368	0.576906	0.614185	0.583028	0.558867	0.659106	0.543773	0.583028	0.9895
[R].SDSGPYPLTAK.[N]		Ttn-203	23045	23055	326xx	49604132	59567140	50568732	43746004	34670560	33055562	46675068	53450220	57274648	43601924	43204652	57071676	53450220	0.513911	0.519517	0.567581	0.599475	0.761702	0.606262	0.583528	0.596797	0.622681	0.595418	0.69137	0.565613	0.596797	0.977767
[K].LTTGEEYQFR.[I]		Ttn-203; A0A0A0MTS7	28548	28557	328xx	51003144	63610980	45556780	46733496	34738220	3.49193e+07	46145138	53412468	59339384	46166816	43637588	59109764	53412468	0.528406	0.554786	0.511328	0.640414	0.763188	0.640445	0.5976	0.596375	0.645128	0.630443	0.698298	0.585812	0.630443	0.947905
[K].ANLLANNEYYFR.[V]		Ttn-203; A0A0A0MTS7	19976	19987	304xx	51411220	70726768	43513024	47935620	39692880	36822352	45724322	53284404	63807588	49953768	47191212	61624220	53284404	0.532633	0.616847	0.488388	0.656888	0.87204	0.675347	0.636867	0.594945	0.693706	0.682157	0.755164	0.610731	0.682157	0.933608
[R].YGVSEPLASNIIVAK.[H]		Ttn-203	29651	29665	335xx	56525556	71099400	50455588	47508396	37567468	36137524	48981992	52893536	63892640	45451324	43267296	61535420	52893536	0.585619	0.620096	0.566312	0.651033	0.825346	0.662787	0.635565	0.590581	0.694631	0.620673	0.692373	0.609851	0.620673	1.02399
[K].AENIIGLGLPDTTIPIECQEK.[L]	1xCarbamidomethyl [C18]	Ttn-203	19398	19418	303xx	51728524	69008152	44927790	46229473	37079085	34446934	4.55786e+07	52809214	60846976	46093924	44540499	62109148	52809214	0.535921	0.601858	0.504268	0.633507	0.814616	0.631781	0.616819	0.58964	0.661519	0.629448	0.712747	0.615537	0.629448	0.979937
[R].IVNLTENAGYYFR.[V]		Ttn-203; A0A0A0MTS7	32699	32711	356xx	5.55334e+07	63156988	4.92622e+07	4.78913e+07	3.86066e+07	3.92055e+07	4.85768e+07	5.27866e+07	6.08283e+07	4.49978e+07	4.31531e+07	5.714e+07	5.27866e+07	0.57534	0.550826	0.552917	0.656281	0.848174	0.719057	0.61581	0.589387	0.661316	0.61448	0.690546	0.566291	0.61448	1.00217
[R].DPCDPPGTPEAIIVK.[R]	1xCarbamidomethyl [C3]	Ttn-203	25433	25447	326xx	56055484	67967672	50972000	45064820	34811792	32620776	48018410	52645260	59930988	45553528	43236012	63734292	52645260	0.580749	0.592783	0.572108	0.617548	0.764804	0.598288	0.595535	0.587809	0.65156	0.622068	0.691872	0.631643	0.631643	0.942834
[K].VGDDAWIK.[D]		Ttn-203	22628	22635	326xx	52187104	59614300	51497780	45736884	32827538	34334124	48617332	52600272	57764140	44333356	41513348	56926992	52600272	0.540672	0.519929	0.578009	0.626757	0.721211	0.629712	0.602383	0.587307	0.628003	0.605406	0.664306	0.564179	0.605406	0.995007
[K].SISGEINVNVIAPPSAPK.[E]		Ttn-203	15389	15406	256xx	5.03496e+07	68790171	45757808	43964445	37299206	34397735	4.48611e+07	52393745	5.74299e+07	43966746	4.26148e+07	5.97952e+07	52393745	0.521635	0.599956	0.513584	0.602468	0.819452	0.630878	0.601212	0.585001	0.624369	0.6004	0.681931	0.592605	0.6004	1.00135
[K].SISGEINVNVIAPPSAPK.[E]		Ttn-203	15389	15406	257xx	5.03496e+07	68790171	45757808	43964445	37299206	34397735	4.48611e+07	52393745	5.74299e+07	43966746	4.26148e+07	5.97952e+07	52393745	0.521635	0.599956	0.513584	0.602468	0.819452	0.630878	0.601212	0.585001	0.624369	0.6004	0.681931	0.592605	0.6004	1.00135
[R].HDSVSLTWTDPK.[K]		Ttn-203; A0A0A0MTS7	22103	22114	321xx	52297324	70311498	42930194	4.32925e+07	32916186	32582319	4.31114e+07	52302579	55988128	41897389	38155980	55582199	52302579	0.541814	0.613225	0.481847	0.593261	0.723159	0.597582	0.595421	0.583983	0.608694	0.572141	0.61058	0.550852	0.583983	1.01959
[R].VNAESTENNSLLTIK.[DE]		Ttn-203; A0A0A0MTS7	24108	24122	326xx	54157600	61491920	52279644	43466736	33708560	33710256	47873190	52177440	59071928	44273904	42469976	59486832	52177440	0.561087	0.536304	0.586785	0.595648	0.740567	0.618269	0.591216	0.582586	0.642221	0.604594	0.679614	0.589549	0.604594	0.977873
[R].STEYPCAGLVEGLEYSFR.[I]	1xCarbamidomethyl [C6]	Ttn-203; A0A0A0MTS7	21062	21079	311xx	47187916	69852820	42228884	44262285	3.66706e+07	34586206	4.32456e+07	51980413	58404187	44455715	43870321	59558330	51980413	0.488879	0.609224	0.473975	0.60655	0.805641	0.634335	0.607887	0.580386	0.634961	0.607077	0.702023	0.590257	0.607077	1.00133
[K].ILVPSTGYPRPK.[A]		Ttn-203	15328	15339	256xx	43797085	53124922	43613034	37101336	32722717	3.03247e+07	40357185	51938280	55310781	4.28039e+07	38133030	55768766	51938280	0.453749	0.463331	0.489511	0.50842	0.718908	0.556176	0.498965	0.579915	0.60133	0.58452	0.610213	0.552701	0.58452	0.853633
[K].NTVSLAWPKPR.[H]		Ttn-203	22893	22903	326xx	49558562	59079670	49820072	43931143	35757502	36846149	4.67449e+07	51759184	56460160	46267224	43402059	58960556	51759184	0.513439	0.515266	0.559179	0.602012	0.785581	0.675784	0.580595	0.577916	0.613826	0.631814	0.694529	0.584333	0.613826	0.945863
[K].ACDPIYKPGPPNNPK.[V]	1xCarbamidomethyl [C2]	Ttn-203; A0A0A0MTS7	24745	24759	326xx	51853338	62811522	49599967	39026169	3.04963e+07	28882087	44313068	51670586	66718762	43024244	39904170	57010245	51670586	0.537214	0.547813	0.556708	0.534797	0.669994	0.529717	0.542514	0.576926	0.725356	0.587529	0.638555	0.565004	0.587529	0.923382
[K].LEAPDIDLDLELR.[K]		Ttn-203; A0A0A0MTS7	24851	24863	326xx	47555164	71804320	38822784	45181820	38912072	35765020	42046946	51640964	58226144	45111468	45423016	56828284	51640964	0.492684	0.626244	0.435745	0.619151	0.854886	0.655955	0.622698	0.576596	0.633025	0.616032	0.726869	0.563201	0.616032	1.01082
[K].TAFVNVR.[V]		Ttn-203; A0A0A0MTS7	27102	27108	326xx	52714996	66198556	31974950	50364064	38072716	36438364	44218390	5.60278e+07	59365752	48770228	43626156	51486192	51486192	0.546141	0.577354	0.358886	0.690166	0.836446	0.668305	0.622829	0.625576	0.645415	0.665995	0.698115	0.510258	0.645415	0.965006
[K].IIGYVVER.[R]		Ttn-203; A0A0A0MTS7	15035	15042	252xx	46687004	62907804	39423008	43157696	36404200	35564936	41290352	51382280	52728828	47888248	46705332	54475800	51382280	0.483689	0.548653	0.442482	0.591413	0.799789	0.652286	0.570033	0.573707	0.573259	0.653951	0.747389	0.539887	0.573707	0.993596
[K].EPQIEPTADLTGITNQLITCK.[A]	1xCarbamidomethyl [C20]	Ttn-203; A0A0A0MTS7	30554	30574	339xx	53142976	69768310	45630382	43602828	35425788	32020538	44616605	51360646	59216184	43738538	41723208	59302694	51360646	0.550575	0.608487	0.512154	0.597513	0.778294	0.587279	0.592396	0.573466	0.643789	0.597283	0.667664	0.587724	0.597283	0.991817
[K].TAAIEIITLDKPDPPK.[G]		Ttn-203	25226	25241	326xx	47976442	72244728	36991142	37445081	38586855	35954501	38015968	51071321	51933860	45241561	41508809	54176756	51071321	0.497048	0.630085	0.415187	0.51313	0.847741	0.65943	0.571608	0.570235	0.564617	0.617808	0.664233	0.536923	0.570235	1.00241
[K].GIYTLTLENPVK.[S]		Ttn-203	15377	15388	256xx	45712688	68773368	39774984	40411272	33363394	31359144	40093128	50945608	57140108	44035704	39830840	54412496	50945608	0.473595	0.59981	0.446433	0.553777	0.732984	0.575148	0.564463	0.568832	0.621218	0.601341	0.637382	0.539259	0.601341	0.938673
[K].AWVSVTNNCNR.[L]	1xCarbamidomethyl [C9]	Ttn-203; A0A0A0MTS7	28237	28247	326xx	31718328	44038980	36203236	41477840	36355004	27704666	36279120	40823896	52649284	50848016	49026940	55626524	50848016	0.32861	0.384088	0.406344	0.568393	0.798708	0.508123	0.457233	0.455818	0.572395	0.694369	0.78454	0.551291	0.572395	0.798808
[K].ITGYVIEAQR.[K]		Ttn-203; A0A0A0MTS7	22910	22919	326xx	49945516	63313064	45059932	43910620	36442036	35692620	44485276	50757952	56167752	45654064	43604528	57607820	50757952	0.517448	0.552188	0.505751	0.601731	0.80062	0.654627	0.576959	0.566736	0.610647	0.623441	0.697769	0.570927	0.610647	0.944833
[K].ITLLWRPPADDGGAK.[I]		Ttn-203; A0A0A0MTS7	28897	28911	332xx	44415712	61072944	40458952	40788496	34170168	33006344	40623724	50655196	58099796	48239920	41691340	57021224	50655196	0.460158	0.53265	0.45411	0.558947	0.750708	0.605359	0.545799	0.565589	0.631652	0.658753	0.667154	0.565113	0.631652	0.864081
[R].EPSYTPGPPSAPR.[V]		Ttn-203; A0A0A0MTS7	31251	31263	344xx	51517884	59684532	49833768	43977636	31609834	31593936	46905702	50610836	57778096	39314728	41234548	56912420	50610836	0.533738	0.520541	0.559332	0.602649	0.694458	0.579455	0.569393	0.565094	0.628154	0.536873	0.659844	0.564035	0.565094	1.00761
[R].EPSYTPGPPSAPR.[V]		Ttn-203; A0A0A0MTS7	31251	31263	345xx	51517884	59684532	49833768	43977636	31609834	31593936	46905702	50610836	57778096	39314728	41234548	56912420	50610836	0.533738	0.520541	0.559332	0.602649	0.694458	0.579455	0.569393	0.565094	0.628154	0.536873	0.659844	0.564035	0.565094	1.00761
[R].VAAENAAGVGEPSEPSVFYR.[A]		Ttn-203; A0A0A0MTS7	26890	26909	326xx	51215555	65318712	50447072	4.47084e+07	35346085	3.10839e+07	4.75777e+07	50545402	60508653	44014974	4.29341e+07	58312907	50545402	0.530606	0.56968	0.566216	0.612664	0.776543	0.570101	0.56989	0.564363	0.65784	0.601058	0.687042	0.577914	0.601058	0.948145
[K].DSVTLQWEKPECDGGK.[E]	1xCarbamidomethyl [C12]	Ttn-203; A0A0A0MTS7	32359	32374	354xx	53062925	61956296	46563421	43846019	34097132	32520074	45204720	50328570	56876088	44180904	41478569	57864347	50328570	0.549745	0.540354	0.522626	0.600846	0.749104	0.596441	0.573093	0.561942	0.618348	0.603324	0.663749	0.573469	0.603324	0.949893
[K].TLETTISGLTAGEEYVFR.[V]		Ttn-203	27264	27281	326xx	47226610	69133364	44874255	44146782	36176731	35381046	4.45105e+07	50042642	56706774	47967276	44096398	59695892	50042642	0.48928	0.60295	0.503667	0.604967	0.794792	0.648913	0.603958	0.55875	0.616507	0.65503	0.70564	0.591621	0.616507	0.979646
[R].STVSLIWSAPVYDGGSK.[V]		Ttn-203	30867	30883	341xx	4.8665e+07	6.49023e+07	39737991	39692164	3.59465e+07	33070709	3.97151e+07	49990202	5.38988e+07	4.13374e+07	3.94213e+07	5.49314e+07	49990202	0.504182	0.566048	0.446018	0.543923	0.789733	0.60654	0.554986	0.558164	0.585979	0.564494	0.630829	0.544402	0.564494	0.983156
[R].VLAENEIGIGEPCETTEPVK.[A]	1xCarbamidomethyl [C13]	Ttn-203; A0A0A0MTS7	29353	29372	335xx	50915728	65473011	47681853	43921687	3.29904e+07	31712570	45801770	49948350	56832304	42940255	3.93928e+07	58392499	49948350	0.5275	0.571026	0.535179	0.601883	0.72479	0.58163	0.576328	0.557697	0.617872	0.586382	0.630372	0.578703	0.586382	0.982854
[R].NSILWQR.[V]		Ttn-203	29713	29719	335xx	44318568	56989916	42702812	42962280	33811744	33360192	42832546	49940296	52285632	43125468	39344436	52987604	49940296	0.459152	0.49704	0.479295	0.588735	0.742834	0.611849	0.542888	0.557607	0.568441	0.588911	0.629598	0.525138	0.568441	0.955046
[R].RLDVVDTSK.[S]		Ttn-203; A0A0A0MTS7	30465	30473	339xx	48509088	57952740	45715532	42101048	34754228	32076600	43908290	49900600	54327140	41237924	39096048	55504964	49900600	0.502567	0.505437	0.513109	0.576933	0.76354	0.588307	0.545021	0.557164	0.590636	0.563135	0.625624	0.550086	0.563135	0.967834
[R].VDSGNYILK.[A]		Ttn-203; A0A0A0MTS7	24523	24531	326xx	45613024	56866404	43380452	41585460	33394374	32069308	42482956	49765856	52944136	43644512	40499452	54714928	49765856	0.472563	0.495963	0.4869	0.569868	0.733664	0.588173	0.532915	0.555659	0.5756	0.595999	0.648081	0.542256	0.5756	0.925843
[R].KKGEAEEEEPFSLPLTER.[L]		Ttn-203	16650	16667	273xx	48333608	57253696	47468980	39642399	29801918	29034497	4.35557e+07	49719346	52350122	38951916	35919291	50531534	49719346	0.500749	0.499341	0.53279	0.543241	0.654739	0.532513	0.532651	0.55514	0.569142	0.531918	0.574788	0.500797	0.55514	0.95949
[K].FGCGPPVEIGPILAVDPLGPPTSPER.[L]	1xCarbamidomethyl [C3]	Ttn-203; A0A0A0MTS7	17189	17214	278xx	48149658	66138312	41378166	42581904	33619023	32009130	41980035	49637446	56636302	44252314	39573264	56717252	49637446	0.498843	0.576828	0.464427	0.583523	0.7386	0.58707	0.580175	0.554225	0.615741	0.604299	0.63326	0.562101	0.604299	0.96008
[K].FGCGPPVEIGPILAVDPLGPPTSPER.[L]	1xCarbamidomethyl [C3]	Ttn-203; A0A0A0MTS7	17189	17214	279xx	48149658	66138312	41378166	42581904	33619023	32009130	41980035	49637446	56636302	44252314	39573264	56717252	49637446	0.498843	0.576828	0.464427	0.583523	0.7386	0.58707	0.580175	0.554225	0.615741	0.604299	0.63326	0.562101	0.604299	0.96008
[K].DELAPPTLDLDFR.[D]		Ttn-203	18727	18739	296xx	47130316	64301392	39468480	45635292	39746876	37437932	42691084	49597536	53584880	43040864	43204604	55655668	49597536	0.488282	0.560807	0.442993	0.625365	0.873227	0.686638	0.593086	0.55378	0.582566	0.587756	0.69137	0.55158	0.582566	1.01806
[K].DELAPPTLDLDFR.[D]		Ttn-203	18727	18739	297xx	47130316	64301392	39468480	45635292	39746876	37437932	42691084	49597536	53584880	43040864	43204604	55655668	49597536	0.488282	0.560807	0.442993	0.625365	0.873227	0.686638	0.593086	0.55378	0.582566	0.587756	0.69137	0.55158	0.582566	1.01806
[R].NSVSLSWTKPEHDGGSK.[I]		Ttn-203; A0A0A0MTS7	25059	25075	326xx	50960917	60784540	42799728	38868681	29131830	3.01075e+07	4.08342e+07	49593903	50957011	37550619	34743792	52553310	49593903	0.527968	0.530135	0.480382	0.532638	0.640017	0.552193	0.531387	0.553739	0.553997	0.512782	0.555978	0.520834	0.553739	0.959633
[R].RPDYDGGSPNLSYHVER.[R]		Ttn-203; A0A0A0MTS7	20037	20053	304xx	52282956	62250708	40740566	41324532	29455939	28994873	41032549	49960060	49565234	38875624	35577273	51123824	49565234	0.541665	0.542922	0.457271	0.566292	0.647138	0.531786	0.542294	0.557828	0.538865	0.530876	0.569315	0.506667	0.538865	1.00636
[R].ETSRPNWAQVSATVPITSCTVEK.[L]	1xCarbamidomethyl [C19]	Ttn-203	21343	21365	314xx	48336068	55887452	48959740	41951644	33790288	32255856	45143856	49207208	58299404	43812660	41959208	55742792	49207208	0.500774	0.487425	0.549522	0.574886	0.742362	0.591595	0.562204	0.549422	0.633822	0.598295	0.67144	0.552443	0.598295	0.939676
[R].AVNAVGVSEPSEISENVVAK.[D]		Ttn-203	16276	16295	269xx	4.33389e+07	61816114	3.59685e+07	4.39033e+07	37774766	3.49177e+07	4.05568e+07	4.91818e+07	54626517	4.53504e+07	4.27097e+07	57381131	4.91818e+07	0.449002	0.539132	0.403709	0.60163	0.8299	0.640415	0.570381	0.549138	0.593891	0.619294	0.68345	0.56868	0.593891	0.960414
[K].WEPPLDDGGSEIINYTLEK.[K]		Ttn-203; A0A0A0MTS7	16736	16754	274xx	54122083	69968741	3.90421e+07	43733739	32671084	3.16111e+07	4.13879e+07	4.91378e+07	57031709	39377743	3.64029e+07	50840189	4.91378e+07	0.560719	0.610235	0.438207	0.599307	0.717774	0.579769	0.589538	0.548646	0.62004	0.537733	0.582527	0.503856	0.548646	1.07453
[R].LTGYVLEACK.[A]	1xCarbamidomethyl [C9]	Ttn-203; A0A0A0MTS7	31580	31589	347xx	48257196	57265628	42221516	42207164	35365368	32455478	42214340	49085548	55335232	42563556	39497480	57624252	49085548	0.499957	0.499445	0.473893	0.578388	0.776966	0.595256	0.539172	0.548063	0.601596	0.581238	0.632047	0.571089	0.581238	0.927627
[R].ICAFNTEGVGEPATIPGSVVAQER.[M]	1xCarbamidomethyl [C2]	Ttn-203	26992	27015	326xx	51850426	63659668	46608704	42412080	32553879	30879105	44510392	49033978	56112860	40265832	38348802	55388418	49033978	0.537184	0.555211	0.523134	0.581196	0.715199	0.566344	0.560777	0.547487	0.61005	0.549861	0.613666	0.548931	0.549861	1.01985
[R].TSVSLAWSVPEDEGGSK.[V]		Ttn-203; A0A0A0MTS7	31961	31977	351xx	49518412	63140764	44398456	43798500	35410164	35376460	44098478	48961944	56170252	40458976	40429812	57461132	48961944	0.513023	0.550685	0.498327	0.600194	0.77795	0.648829	0.57544	0.546683	0.610674	0.552498	0.646967	0.569473	0.569473	1.01048
[K].TSFNVTNLVPGNEYFFR.[V]		Ttn-203	20669	20685	307xx	4.88674e+07	70004764	3.92245e+07	42715422	3.45333e+07	32144880	4.097e+07	48869217	57206606	41545995	40525341	56042720	48869217	0.506279	0.61055	0.440254	0.585352	0.758685	0.589559	0.587456	0.545648	0.621941	0.567342	0.648495	0.555416	0.567342	1.03545
[K].APADDGGSPITGYLVEK.[R]		Ttn-203	21424	21440	315xx	54695356	68946768	43689560	42708316	33910952	31492066	43198938	48821236	60150656	41846940	40136032	55505844	48821236	0.566658	0.601322	0.49037	0.585255	0.745013	0.577586	0.581421	0.545112	0.653948	0.571452	0.642266	0.550095	0.571452	1.01744
[R].DTLPEDTGYYR.[V]		Ttn-203; A0A0A0MTS7	33770	33780	358xx	44877960	56696188	42067948	42745892	33105758	32381708	42406920	48720940	53843752	42002448	41107964	55210864	48720940	0.464947	0.494478	0.472169	0.58577	0.727323	0.593903	0.540124	0.543992	0.585381	0.573576	0.657819	0.547171	0.573576	0.941679
[K].SGFVNVR.[V]		Ttn-203; A0A0A0MTS7	22771	22777	326xx	47640316	55652632	43367812	43283520	31442698	31218482	43325666	48543672	54575664	40511848	38683292	51618520	48543672	0.493566	0.485377	0.486759	0.593137	0.690786	0.572569	0.533067	0.542013	0.593338	0.55322	0.619019	0.511569	0.55322	0.963571
[R].SDGGSPIQGYIIEK.[R]		Ttn-203	17234	17247	279xx	49161840	60011564	41339528	43573376	33063172	32649792	42456452	48452444	57690320	41358620	37848856	52278760	48452444	0.509329	0.523393	0.463993	0.597109	0.726388	0.59882	0.560251	0.540994	0.6272	0.564784	0.605666	0.518113	0.564784	0.991975
[K].AVNDVGESEPSLPLNVVIQDDEVPPTIK.[L]		Ttn-203	17285	17312	279xx	NA	57784100	41656188	41570552	32412292	31381480	41570552	48436128	55291768	43350076	22796174	53161160	48436128		0.503967	0.467547	0.569664	0.712088	0.575558	0.569664	0.540812	0.601123	0.591978	0.364789	0.526858	0.540812	1.05335
[K].AVNDVGESEPSLPLNVVIQDDEVPPTIK.[L]		Ttn-203	17285	17312	280xx	NA	57784100	41656188	41570552	32412292	31381480	41570552	48436128	55291768	43350076	22796174	53161160	48436128		0.503967	0.467547	0.569664	0.712088	0.575558	0.569664	0.540812	0.601123	0.591978	0.364789	0.526858	0.540812	1.05335
[KR].AANIVGEGEPR.[E]		Ttn-203; A0A0A0MTS7	19795	19805	304xx	44469804	51560524	45469452	40677636	32195988	30531402	42573720	48428368	52631388	41116348	37543740	53859896	48428368	0.460719	0.449687	0.510347	0.557428	0.707336	0.559967	0.533887	0.540726	0.5722	0.561475	0.600783	0.533783	0.561475	0.950866
[R].FGIGSYLQSEVIECR.[S]	1xCarbamidomethyl [C14]	Ttn-203; A0A0A0MTS7	31826	31840	349xx	42472253	65951955	3.45927e+07	4.03572e+07	38598564	3.48971e+07	3.94779e+07	48378590	54556508	43904519	43771224	54569061	48378590	0.440023	0.575203	0.388268	0.553036	0.847999	0.640036	0.564119	0.54017	0.59313	0.59955	0.700437	0.540811	0.59313	0.951089
[R].TDSGAYILTATNPGGFAK.[H]		Ttn-203	23441	23458	326xx	37719595	60622138	3.58741e+07	4.07499e+07	3.07731e+07	3.00166e+07	3.67968e+07	48369124	5.51031e+07	4.20935e+07	3.76029e+07	5.04732e+07	48369124	0.390785	0.528719	0.40265	0.558417	0.676076	0.550526	0.539622	0.540064	0.599072	0.574819	0.60173	0.500218	0.574819	0.938768
[K].SVHADAGVYTITLENK.[L]		Ttn-203	16363	16378	270xx	46460707	63336410	35946488	37989611	32821675	32547287	3.6968e+07	48557584	48268111	39488644	36428871	48852613	48268111	0.481345	0.552391	0.403462	0.520592	0.721082	0.59694	0.536492	0.542168	0.524763	0.539248	0.582943	0.484157	0.539248	0.994889
[K].KGEDPLATDTR.[V]		Ttn-203; A0A0A0MTS7	21932	21942	320xx	42462876	52333378	40812620	38733292	32654361	30834404	39772956	48248446	49824402	40579810	37367660	50145400	48248446	0.439926	0.456428	0.458079	0.530783	0.717406	0.565524	0.494431	0.538717	0.541683	0.554148	0.597966	0.49697	0.541683	0.912769
[K].LPYTTPGPPSTPWVSNVTR.[E]		Ttn-203	28579	28597	328xx	54020103	65544697	4.03553e+07	4.21785e+07	3.25847e+07	31133249	4.12669e+07	48213382	56409107	4.02022e+07	3.94068e+07	53644691	48213382	0.559662	0.571651	0.452947	0.577995	0.715875	0.571005	0.571328	0.538325	0.613271	0.548992	0.630597	0.53165	0.548992	1.04068
[K].LPYTTPGPPSTPWVSNVTR.[E]		Ttn-203	28579	28597	329xx	54020103	65544697	4.03553e+07	4.21785e+07	3.25847e+07	31133249	4.12669e+07	48213382	56409107	4.02022e+07	3.94068e+07	53644691	48213382	0.559662	0.571651	0.452947	0.577995	0.715875	0.571005	0.571328	0.538325	0.613271	0.548992	0.630597	0.53165	0.548992	1.04068
[R].VCAVNAAGVGPFSEPSDFYK.[A]	1xCarbamidomethyl [C2]	Ttn-203	29054	29073	333xx	49953911	62399888	40267308	40905360	32607920	2.93675e+07	40586334	48210496	55710984	40023391	3.65873e+07	50288972	48210496	0.517535	0.544223	0.451959	0.560548	0.716386	0.538621	0.541422	0.538293	0.605681	0.54655	0.585478	0.498393	0.54655	0.990618
[K].LTNSAGEATETLNVIVLDKPGPPTGPVK.[M]		Ttn-203	24136	24163	326xx	6.19845e+07	63461777	55717835	3.98672e+07	3.59245e+07	3.56263e+07	4.77925e+07	48164504	49857620	4.12814e+07	3.74591e+07	51706800	48164504	0.642175	0.553485	0.625375	0.546322	0.789251	0.653412	0.633775	0.537779	0.542044	0.563729	0.599429	0.512444	0.542044	1.16923
[R].QNATVQGLIQGK.[AS]		Ttn-203; A0A0A0MTS7	18587	18598	295xx	45316332	53494864	42678864	42757280	33988324	31745346	42718072	48108848	53413848	40742692	39614104	55164468	48108848	0.469489	0.466558	0.479026	0.585926	0.746713	0.582232	0.530629	0.537158	0.580707	0.556373	0.633914	0.546712	0.556373	0.953729
[K].DPFDKPSQPGELEILSISK.[D]		Ttn-203; A0A0A0MTS7	32340	32358	353xx	44558623	66614544	40002009	38449911	35701465	3.12439e+07	39225960	48098681	56663799	43741787	44333277	57404214	48098681	0.461639	0.580982	0.448981	0.5269	0.78435	0.573035	0.549967	0.537044	0.61604	0.597328	0.709431	0.568909	0.597328	0.920713
[K].DPFDKPSQPGELEILSISK.[D]		Ttn-203; A0A0A0MTS7	32340	32358	354xx	44558623	66614544	40002009	38449911	35701465	3.12439e+07	39225960	48098681	56663799	43741787	44333277	57404214	48098681	0.461639	0.580982	0.448981	0.5269	0.78435	0.573035	0.549967	0.537044	0.61604	0.597328	0.709431	0.568909	0.597328	0.920713
[K].RPGPPSTPEASAITK.[D]		Ttn-203	26815	26829	326xx	52538068	62361674	48719030	41563810	28773618	28007392	45141420	48027497	53317506	37410532	33968227	52798844	48027497	0.544308	0.54389	0.54682	0.569571	0.632148	0.513675	0.545564	0.53625	0.579659	0.510869	0.543567	0.523267	0.53625	1.01737
[KV].ITNYVVER.[RK]		Ttn-203; A0A0A0MTS7	15729	15736	262xx	44138668	56753200	38389084	42474712	32553900	31707094	40431898	47831948	53873044	40874516	38563580	49028536	47831948	0.457288	0.494975	0.430878	0.582054	0.715199	0.58153	0.538253	0.534066	0.585699	0.558173	0.617103	0.485901	0.558173	0.964312
[K].DSCVVAWKPPASDGGAK.[I]	1xCarbamidomethyl [C3]	Ttn-203; A0A0A0MTS7	32753	32769	357xx	50034546	61819642	43390520	41049862	32785853	30015540	42220191	47824632	56506056	43071214	39066907	58499444	47824632	0.518371	0.539163	0.487013	0.562528	0.720295	0.550506	0.544834	0.533985	0.614325	0.58817	0.625157	0.579763	0.58817	0.92632
[R].INVTDSLDLTTLSIK.[E]		Ttn-203; A0A0A0MTS7	25190	25204	326xx	4.89443e+07	6.39921e+07	40686191	3.88296e+07	33814828	3.23199e+07	3.97579e+07	47744774	5.1611e+07	4.23516e+07	4.06541e+07	5.35686e+07	47744774	0.507075	0.55811	0.45666	0.532103	0.742901	0.592769	0.545106	0.533093	0.561106	0.578343	0.650556	0.530896	0.561106	0.971484
[R].LAWTNVATEVQVTK.[L]		Ttn-203	23514	23527	326xx	38879260	66686380	32521958	39765236	36922568	34216916	37900914	47735476	53964452	44475808	41798516	54482980	47735476	0.402799	0.581608	0.365025	0.544924	0.811178	0.627562	0.563266	0.532989	0.586693	0.607351	0.668869	0.539958	0.586693	0.96007
[K].ETHKDDGGQYGITVSNVVGQK.[T]		Ttn-203	25205	25225	326xx	54641152	61498628	46849492	42378260	32711087	29281056	44613876	47662902	52968468	41929142	34407641	52994714	47662902	0.566096	0.536363	0.525837	0.580732	0.718653	0.537035	0.551566	0.532179	0.575865	0.572575	0.550599	0.525208	0.550599	1.00176
[K].GRPTPEITWSK.[E]		Ttn-203	25964	25974	326xx	50534548	72305490	40997945	38064218	33284789	28546829	3.95311e+07	47648196	53193992	41642287	37959551	54551356	47648196	0.523551	0.630615	0.460159	0.521614	0.731257	0.523569	0.52356	0.532015	0.578317	0.568657	0.607437	0.540635	0.568657	0.920695
[K].STYLNSEPVVAQYPFK.[V]		Ttn-203	24238	24253	326xx	5.17914e+07	64083498	40559759	4.53096e+07	3.63171e+07	32896567	4.29347e+07	4.76014e+07	58002048	4.25623e+07	3.94421e+07	5.53084e+07	4.76014e+07	0.536572	0.558907	0.455241	0.620902	0.797876	0.603346	0.581126	0.531492	0.630589	0.581221	0.63116	0.548138	0.581221	0.999837
[K].GGVEYLFR.[V]		Ttn-203; A0A0A0MTS7	15070	15077	252xx	43738664	61269412	35075592	38763888	31776420	29597004	36919740	47558832	51093460	43471584	38108416	52194620	47558832	0.453144	0.534364	0.393687	0.531202	0.698118	0.54283	0.532783	0.531017	0.55548	0.593638	0.609819	0.517279	0.55548	0.95914
[K].VTGLTENSDYQYR.[V]		Ttn-203; A0A0A0MTS7	29041	29053	333xx	45541188	55869384	45856672	40240812	32197764	31315074	42891000	47482804	54118992	38756960	40298432	53332640	47482804	0.471818	0.487267	0.514693	0.551442	0.707375	0.57434	0.533068	0.530168	0.588373	0.529256	0.644864	0.528557	0.530168	1.00547
[KR].VNTSPISGR.[E]		Ttn-203; A0A0A0MTS7	29720	29728	335xx	44729380	54114432	44927068	40406716	31711162	31265816	42568048	47451724	53018952	40342456	38850432	52747008	47451724	0.463408	0.471961	0.50426	0.553715	0.696685	0.573437	0.528987	0.529821	0.576414	0.550907	0.621693	0.522753	0.550907	0.960211
[R].GDWVTALASVTK.[T]		Ttn-203; A0A0A0MTS7	20951	20962	310xx	51121072	66787144	39423440	35163312	31433400	30262738	37293376	47355452	51841068	41587852	37786280	51345488	47355452	0.529627	0.582487	0.442487	0.481862	0.690582	0.55504	0.542333	0.528746	0.563608	0.567914	0.604664	0.508863	0.563608	0.962253
[R].FSCDTDGEPVPTVTWLR.[KE]	1xCarbamidomethyl [C3]	Ttn-203; A0A0A0MTS7	34494	34510	358xx	46086204	61409424	39538096	38976676	31521884	29758690	39257386	47283592	51304132	37094704	36483132	50083100	47283592	0.477465	0.535585	0.443774	0.534118	0.692526	0.545795	0.534852	0.527944	0.55777	0.506557	0.583811	0.496352	0.527944	1.01308
[R].NSFTIPSQPGIPEEVGAGK.[E]		Ttn-203	31149	31167	343xx	48838024	57635728	47114216	43013344	33100616	31850974	45063780	46925552	53417820	38735252	39238308	54118408	46925552	0.505974	0.502672	0.528808	0.589435	0.72721	0.584169	0.556488	0.523946	0.58075	0.52896	0.6279	0.536345	0.536345	1.03756
[R].NSFTIPSQPGIPEEVGAGK.[E]		Ttn-203	31149	31167	344xx	48838024	57635728	47114216	43013344	33100616	31850974	45063780	46925552	53417820	38735252	39238308	54118408	46925552	0.505974	0.502672	0.528808	0.589435	0.72721	0.584169	0.556488	0.523946	0.58075	0.52896	0.6279	0.536345	0.536345	1.03756
[R].LAWTICEAELR.[T]	1xCarbamidomethyl [C6]	Ttn-203	27842	27852	326xx	38891692	56827944	31134624	34286056	40041172	36028572	37460132	43495856	46679532	46844428	47775976	48580932	46844428	0.402928	0.495627	0.349454	0.46984	0.879692	0.660789	0.482734	0.485652	0.507492	0.639697	0.764522	0.481465	0.507492	0.951214
[K].EPVVYDTHVNK.[Q]		Ttn-203	18076	18086	289xx	51305694	61689680	38522027	39572495	29372270	27468563	39047261	46767814	53926192	38533997	33530280	48543086	46767814	0.53154	0.538029	0.43237	0.542283	0.6453	0.503792	0.534785	0.522185	0.586277	0.526211	0.536559	0.48109	0.526211	1.01629
[R].ESHEYFFR.[V]		Ttn-203	28353	28360	327xx	40871021	62076740	30175499	37078535	30837643	27934395	33958089	46644556	48196878	39169616	34636452	49388756	46644556	0.423434	0.541405	0.338689	0.508107	0.677494	0.512336	0.510222	0.520808	0.523989	0.534891	0.55426	0.489471	0.523989	0.973726
[K].TSFQFTGQSFK.[S]		Ttn-203	34716	34726	358xx	49931988	61667868	42404568	40467940	30971834	29825356	41436254	52795324	50494960	38254816	35979072	46498496	46498496	0.517308	0.537839	0.475947	0.554554	0.680442	0.547018	0.542428	0.589485	0.548973	0.522399	0.575745	0.460827	0.548973	0.988078
[K].TTHHVVSGLR.[E]		Ttn-203	28343	28352	327xx	47385742	60498172	37177949	38520255	30405772	28076144	37849102	46428326	48551312	33725845	30635630	51839839	46428326	0.490928	0.527637	0.417284	0.527864	0.668005	0.514936	0.521287	0.518394	0.527842	0.460552	0.490238	0.513763	0.513763	1.01464
[R].VFAENEYGIGDPGETR.[D]		Ttn-203; A0A0A0MTS7	21774	21789	318xx	90200296	60338344	58225740	43706940	31683280	32668984	50966340	46379268	52348988	38493680	37330784	51029704	46379268	0.934498	0.526243	0.653523	0.59894	0.696072	0.599172	0.626348	0.517846	0.56913	0.525661	0.597375	0.505734	0.525661	1.19154
[R].VSAENQFGISKPLK.[S]		Ttn-203; A0A0A0MTS7	32216	32229	352xx	48428036	53363768	46689604	35235814	29191967	27401998	40962709	46173678	52666343	38813195	35425978	52302100	46173678	0.501727	0.465414	0.524042	0.482855	0.641339	0.502572	0.502149	0.515551	0.57258	0.530024	0.566894	0.518344	0.530024	0.947409
[R].TWSVVSHK.[C]		Ttn-203; A0A0A0MTS7	29325	29332	335xx	44146022	58029840	38021638	38992922	30248677	27904651	38507280	46163414	50158756	39073999	35775452	50614728	46163414	0.457364	0.50611	0.426753	0.534341	0.664554	0.511791	0.50895	0.515436	0.545318	0.533585	0.572487	0.501621	0.533585	0.953831
[K].VVGYIIER.[K]		Ttn-203; A0A0A0MTS7	30884	30891	341xx	44142192	52366780	38281920	37823752	30785860	31010774	38052836	46154928	48053968	37754632	37047760	47677664	46154928	0.457324	0.456719	0.429675	0.518319	0.676356	0.568759	0.487822	0.515342	0.522435	0.515568	0.592846	0.472513	0.515568	0.946183
[K].STPLDSKPVVVQYPFK.[E]		Ttn-203	26402	26417	326xx	45894659	62852690	38391520	39152469	31378946	2.70182e+07	3.8772e+07	46153184	52800297	38152667	35258909	48907461	46153184	0.47548	0.548172	0.430905	0.536527	0.689386	0.495532	0.51603	0.515322	0.574036	0.521004	0.564221	0.484701	0.521004	0.990453
[R].VTAVNAAGNSEPSEASNFISCR.[E]	1xCarbamidomethyl [C21]	Ttn-203; A0A0A0MTS7	31229	31250	344xx	46299108	58443984	35387110	43207006	34788651	32339021	39297058	46140786	53331376	39692866	38216812	48640334	46140786	0.479671	0.509722	0.397184	0.592089	0.764296	0.59312	0.550905	0.515184	0.57981	0.542036	0.611554	0.482054	0.542036	1.01636
[K].YYGAVGSTLR.[L]		Ttn-203; A0A0A0MTS7	32552	32561	355xx	41592152	55607144	37688232	40377984	33208988	30852490	39033108	46098516	47870496	40706504	37367908	52032140	46098516	0.430905	0.48498	0.423011	0.553321	0.729591	0.565856	0.519151	0.514712	0.52044	0.555878	0.597969	0.515668	0.52044	0.997522
[K].YGIGEALESEPVIACNPYK.[R]	1xCarbamidomethyl [C15]	Ttn-203	26796	26814	326xx	NA	64862489	NA	NA	31765150	NA	4.83138e+07	45982814	57015258	42797260	3.94394e+07	57589057	45982814		0.565701			0.697871		0.631786	0.51342	0.619861	0.584429	0.631117	0.570741	0.584429	1.08103
[K].ISLQYTGK.[R]		Ttn-203	31008	31015	342xx	42910784	57903180	33388824	39365936	30306562	27683110	36377380	45923196	51386992	40763760	36936560	49954632	45923196	0.444567	0.505005	0.374755	0.539453	0.665826	0.507727	0.506366	0.512754	0.558671	0.55666	0.591067	0.495079	0.55666	0.90965
[R].FGPGPPCVSKPLLAK.[D]	1xCarbamidomethyl [C7]	Ttn-203	16797	16811	274xx	47978654	56321025	44948197	33773117	26259803	2.53053e+07	39360657	45877867	50981451	3.61752e+07	33154306	49597720	45877867	0.497071	0.491206	0.504497	0.462811	0.57692	0.464117	0.494139	0.512248	0.554262	0.493999	0.530542	0.491542	0.512248	0.964647
[R].IIHYVVEALEK.[G]		Ttn-203	28320	28330	327xx	4.27188e+07	63288791	3.15456e+07	32650207	30263749	28737878	3.20979e+07	45836665	47802949	37016666	32400032	48352584	45836665	0.442578	0.551976	0.354067	0.447423	0.664885	0.527073	0.487248	0.511788	0.519706	0.505491	0.518472	0.479202	0.511788	0.95205
[K].TAYVGENVR.[F]		Ttn-203; A0A0A0MTS7	33613	33621	358xx	38681136	48202852	39473348	39490316	30342830	30841254	39077242	45805512	47649088	35712472	36048180	47957732	45805512	0.400746	0.420403	0.443047	0.541157	0.666623	0.56565	0.492102	0.51144	0.518033	0.487681	0.576851	0.475289	0.51144	0.962189
[K].ITSYVVEK.[R]		Ttn-203	23302	23309	326xx	45722708	55164036	33939580	39771320	3.15543e+07	30498274	36855450	45780348	51515872	40320540	36571760	49368668	45780348	0.473699	0.481116	0.380937	0.545008	0.693238	0.559359	0.513062	0.511159	0.560072	0.550608	0.585229	0.489272	0.550608	0.93181
[K].ATWTFGDQVLEEGDR.[V]		Ttn-203	15340	15354	256xx	37996172	62662824	31374276	39513568	34610808	31247542	36303490	45486692	50932384	40652388	40349380	50285036	45486692	0.39365	0.546517	0.352144	0.541476	0.760389	0.573102	0.543996	0.50788	0.553729	0.555139	0.64568	0.498354	0.553729	0.982423
[R].DTIVVNAGETFR.[L]		Ttn-203; A0A0A0MTS7	25547	25558	326xx	34292720	46369880	36046896	45261620	39045928	38029304	38537616	44614004	53476572	43516188	45444064	53029932	45444064	0.355281	0.404417	0.404589	0.620244	0.857827	0.697484	0.512417	0.498136	0.581389	0.594247	0.727206	0.525557	0.581389	0.881367
[K].APEVTAVTK.[D]		Ttn-203	24656	24664	326xx	44286476	51480740	43049920	38613040	30912696	29710598	40831480	45424928	49778068	38779596	36290976	51463020	45424928	0.458819	0.448991	0.483191	0.529135	0.679142	0.544913	0.506163	0.507191	0.541179	0.529565	0.580736	0.510028	0.529565	0.955809
[K].DGVEIEER.[A]		Ttn-203	27740	27747	326xx	4.29075e+07	51546360	41056261	3.95651e+07	3.00935e+07	3.00114e+07	4.03107e+07	45349416	51906477	38775865	3.84956e+07	5.0707e+07	45349416	0.444533	0.449564	0.460814	0.542181	0.661146	0.55043	0.501498	0.506348	0.564319	0.529514	0.616015	0.502535	0.529514	0.94709
[KR].TEEVVVK.[E]		Ttn-203; A0A0A0MTS7	20103	20109	304xx	43078462	52829473	40661259	38487854	29681621	2.84709e+07	3.95746e+07	45333546	50453303	36619067	3.36716e+07	48158171	45333546	0.446304	0.460755	0.45638	0.52742	0.652096	0.522176	0.491465	0.50617	0.54852	0.500061	0.53882	0.477275	0.50617	0.970948
[K].YTLTLENSSGTK.[S]		Ttn-203; A0A0A0MTS7	24925	24936	326xx	44892388	55600860	40976868	39502064	30140426	27998274	40239466	45289172	49500320	38663644	33876952	50912784	45289172	0.465097	0.484925	0.459923	0.541318	0.662176	0.513508	0.499216	0.505675	0.53816	0.527982	0.542106	0.504575	0.527982	0.945519
[K].YGIGEPLDSEPETAR.[N]		Ttn-203; A0A0A0MTS7	18211	18225	290xx	49821844	61270356	45904348	41512752	31856070	29863960	43708550	45263260	53658496	38892600	37561712	53514176	45263260	0.516167	0.534372	0.515229	0.568872	0.699868	0.547726	0.541049	0.505386	0.583367	0.531108	0.601071	0.530356	0.531108	1.01872
[R].VIAVNEK.[G]		Ttn-203	25117	25123	326xx	42876096	51251224	41050044	36577504	28239038	27181802	38813774	45161276	48011868	36802500	34469972	49060308	45161276	0.444207	0.44699	0.460744	0.501241	0.620403	0.498533	0.479639	0.504247	0.521977	0.502566	0.551596	0.486216	0.504247	0.951198
[K].STITLDWK.[E]		Ttn-203; A0A0A0MTS7	17223	17230	279xx	39193440	56330368	30687802	36369684	33054938	29560526	34712311	45141972	4.99645e+07	43417200	37519528	49010004	45141972	0.406054	0.491288	0.344439	0.498393	0.726207	0.54216	0.494841	0.504031	0.543206	0.592895	0.600396	0.485717	0.543206	0.910964
[K].ITEKPSPPEK.[L]		Ttn-203; A0A0A0MTS7	28285	28294	326xx	47119286	55155302	44824597	38319377	30480588	29120096	41571987	45051035	50945967	37948699	35010709	52679253	45051035	0.488168	0.481039	0.50311	0.525111	0.669649	0.534083	0.51411	0.503016	0.553876	0.518219	0.560249	0.522082	0.522082	0.984731
[K].ITEKPSPPEK.[L]		Ttn-203; A0A0A0MTS7	28285	28294	327xx	47119286	55155302	44824597	38319377	30480588	29120096	41571987	45051035	50945967	37948699	35010709	52679253	45051035	0.488168	0.481039	0.50311	0.525111	0.669649	0.534083	0.51411	0.503016	0.553876	0.518219	0.560249	0.522082	0.522082	0.984731
[R].NVHVEVYDRPSPPR.[N]		Ttn-203; A0A0A0MTS7	17403	17416	280xx	43397984	51901896	36340380	34801372	27914124	25394496	35570876	45236560	45020240	35688612	28829748	45511280	45020240	0.449614	0.452665	0.407883	0.476902	0.613265	0.465753	0.459209	0.505088	0.489453	0.487355	0.46134	0.451043	0.487355	0.942246
[R].NVHVEVYDRPSPPR.[N]		Ttn-203; A0A0A0MTS7	17403	17416	281xx	43397984	51901896	36340380	34801372	27914124	25394496	35570876	45236560	45020240	35688612	28829748	45511280	45020240	0.449614	0.452665	0.407883	0.476902	0.613265	0.465753	0.459209	0.505088	0.489453	0.487355	0.46134	0.451043	0.487355	0.942246
[K].SSAVLAWLKPDHDGGSR.[I]		Ttn-203; A0A0A0MTS7	30474	30490	339xx	4.45259e+07	5.53214e+07	36090604	32837834	2.89025e+07	2.4589e+07	34464219	44980930	4.59984e+07	3.22282e+07	2.96872e+07	5.28485e+07	44980930	0.4613	0.482488	0.40508	0.449995	0.63498	0.450979	0.45614	0.502233	0.500088	0.440101	0.475061	0.523759	0.500088	0.912119
[R].ETTSTTWQVVSQAVAR.[T]		Ttn-203	27442	27457	326xx	43528428	57470981	39276310	42356920	34585037	34541249	40816615	44927985	51540466	44238427	41580851	55783941	44927985	0.450966	0.501236	0.440836	0.58044	0.759823	0.63351	0.540838	0.501642	0.56034	0.60411	0.665386	0.552851	0.56034	0.965196
[K].YILTVENSSGSK.[S]		Ttn-203; A0A0A0MTS7	23843	23854	326xx	49005048	50978104	46648520	39376408	30219526	30606252	43012464	44816028	48693272	37200208	33506726	48638768	44816028	0.507705	0.444608	0.523581	0.539596	0.663914	0.56134	0.531589	0.500392	0.529386	0.507997	0.536182	0.482038	0.507997	1.04644
[R].NAAGVFSEPSESTGAITAR.[D]		Ttn-203; A0A0A0MTS7	24431	24449	326xx	44280028	52729868	39107356	44511624	35029872	32198350	41693692	44761864	52214372	39041772	39172032	52362176	44761864	0.458752	0.459886	0.438939	0.609967	0.769596	0.59054	0.525213	0.499787	0.567666	0.533145	0.626839	0.518939	0.533145	0.985122
[K].WAKPEYTGGFK.[I]		Ttn-203; A0A0A0MTS7	23291	23301	326xx	46042816	59979914	38604250	36402237	29595353	27227115	3.75032e+07	44644298	51895111	38881320	34911390	50966886	44644298	0.477015	0.523117	0.433293	0.498839	0.650201	0.499364	0.499102	0.498475	0.564195	0.530954	0.55866	0.505111	0.530954	0.940009
[K].DVATAQWSPLSTTSK.[K]		Ttn-203	19264	19278	302xx	41951096	53685980	39980904	37088448	30036298	27950016	38534676	44628136	49542296	37346864	36645932	50698064	44628136	0.434624	0.468225	0.448744	0.508243	0.659888	0.512623	0.488234	0.498294	0.538616	0.51	0.586416	0.502447	0.51	0.957321
[K].NSSGHAQGSAIVNVLDRPGPCQNLK.[V]	1xCarbamidomethyl [C21]	Ttn-203; A0A0A0MTS7	19899	19923	304xx	44449816	47400394	48518192	35380572	24302219	26689828	39915194	44384705	45236020	33592584	30288372	45107052	44384705	0.460511	0.413405	0.544566	0.484839	0.533912	0.48951	0.487174	0.495576	0.491799	0.458732	0.484681	0.447037	0.484681	1.00514
[K].EPGPPGTPFVTAISK.[E]		Ttn-203	25336	25350	326xx	45979692	63735916	34968868	40083924	32550014	29646302	37526396	44360108	52379160	38227052	37975440	48290552	44360108	0.476361	0.555876	0.392489	0.549292	0.715114	0.543734	0.546513	0.495302	0.569458	0.52202	0.607691	0.478587	0.52202	1.04692
[K].YDGGSEIINYVLESR.[L]		Ttn-203; A0A0A0MTS7	18656	18670	296xx	52787805	75506947	26099791	4.32171e+07	3.6719e+07	34029858	3.9968e+07	4.78782e+07	5.669e+07	41274914	3.87328e+07	44340739	44340739	0.546895	0.658537	0.292943	0.592227	0.806704	0.624131	0.608179	0.534583	0.616325	0.563641	0.619811	0.439442	0.563641	1.07902
[R].NSVTLQWK.[K]		Ttn-203; A0A0A0MTS7	24367	24374	326xx	42887048	52772272	41262068	38712476	30957244	28566300	39987272	44326872	50562304	39272540	36478076	52791532	44326872	0.444321	0.460256	0.463124	0.530498	0.680121	0.523926	0.493525	0.49493	0.549705	0.536297	0.58373	0.523194	0.536297	0.920246
[R].GEFGIVHR.[C]		Ttn-203; A0A0A0MTS7	33174	33181	358xx	48430134	65599710	36582848	33791411	26822585	23827048	3.51871e+07	44284486	45007142	3.36156e+07	30577043	46626718	44284486	0.501749	0.572131	0.410604	0.463062	0.589284	0.437005	0.482405	0.494457	0.48931	0.459047	0.489301	0.462098	0.489301	0.985908
[K].DTFTTPGPPYALTVVDVTK.[R]		Ttn-203	16093	16111	266xx	33540844	57755108	23888602	37169548	37184108	32271298	35355196	46769916	44210708	42602560	43273520	49977268	44210708	0.347492	0.503714	0.268125	0.509354	0.816923	0.591878	0.506534	0.522208	0.480652	0.581771	0.692472	0.495303	0.522208	0.969985
[K].DTFTTPGPPYALTVVDVTK.[R]		Ttn-203	16093	16111	267xx	33540844	57755108	23888602	37169548	37184108	32271298	35355196	46769916	44210708	42602560	43273520	49977268	44210708	0.347492	0.503714	0.268125	0.509354	0.816923	0.591878	0.506534	0.522208	0.480652	0.581771	0.692472	0.495303	0.522208	0.969985
[K].TGGSPITGYHLEFK.[E]		Ttn-203; A0A0A0MTS7	22116	22129	321xx	44833040	53194208	36336260	35368204	25837768	25791282	35852232	44186352	48215744	37272628	29565944	45327692	44186352	0.464482	0.463936	0.407837	0.48467	0.567648	0.47303	0.468756	0.493361	0.524194	0.508986	0.473121	0.449224	0.493361	0.950127
[K].TGGSPITGYHLEFK.[E]		Ttn-203; A0A0A0MTS7	22116	22129	322xx	44833040	53194208	36336260	35368204	25837768	25791282	35852232	44186352	48215744	37272628	29565944	45327692	44186352	0.464482	0.463936	0.407837	0.48467	0.567648	0.47303	0.468756	0.493361	0.524194	0.508986	0.473121	0.449224	0.493361	0.950127
[K].YGVGEPLESEPVLAVDPYGPPDPPKNPEVTTITK.[D]		Ttn-203	23549	23582	326xx	41501479	6.21167e+07	36254107	3.76533e+07	2.8497e+07	2.57375e+07	3.69537e+07	4.41738e+07	51958474	3.5379e+07	3.17539e+07	53471175	4.41738e+07	0.429966	0.541754	0.406915	0.515984	0.626071	0.472044	0.494014	0.493221	0.564884	0.483127	0.508133	0.52993	0.508133	0.972213
[K].DSAYVTWDPPIIDGGSPIINYVVEK.[R]		Ttn-203	21715	21739	318xx	43020032	61318842	31463381	36645708	30366531	27736667	3.40545e+07	44025136	53146800	40756674	36354268	48461766	44025136	0.445699	0.534795	0.353144	0.502176	0.667143	0.50871	0.505443	0.491561	0.577804	0.556564	0.581749	0.480284	0.556564	0.908149
[R].VTAINAR.[G]		Ttn-203; A0A0A0MTS7	31920	31926	350xx	40192776	45459872	41441560	43824076	31415768	31134632	40817168	44006636	54307524	38689416	39018676	51772152	44006636	0.416407	0.39648	0.465138	0.600545	0.690195	0.571031	0.518085	0.491355	0.590423	0.528334	0.624385	0.513092	0.528334	0.980601
[R].YNLTLENNSGSK.[T]		Ttn-203; A0A0A0MTS7	27090	27101	326xx	43039044	53354436	38894688	35606888	28682354	26999978	37250788	43722420	47101952	34858080	33670176	48901416	43722420	0.445896	0.465333	0.436552	0.48794	0.630143	0.495198	0.476637	0.488181	0.512085	0.476014	0.538798	0.484641	0.488181	0.976352
[K].DILIPPEGELDAELRK.[T]		Ttn-203	21600	21615	316xx	42197688	47583136	40499632	37562268	27810402	26172182	39030950	43523100	49030660	38859408	34595636	48830700	43523100	0.437179	0.414998	0.454566	0.514736	0.610986	0.480016	0.467291	0.485956	0.533054	0.530655	0.553607	0.48394	0.530655	0.880593
[K].DILIPPEGELDAELRK.[T]		Ttn-203	21600	21615	317xx	42197688	47583136	40499632	37562268	27810402	26172182	39030950	43523100	49030660	38859408	34595636	48830700	43523100	0.437179	0.414998	0.454566	0.514736	0.610986	0.480016	0.467291	0.485956	0.533054	0.530655	0.553607	0.48394	0.530655	0.880593
[R].LEADVHGKPLPTIEWLR.[G]		Ttn-203; A0A0A0MTS7	25559	25575	326xx	50607036	60939592	37118966	3.67241e+07	26802458	25732224	3.69215e+07	43404972	50243006	35324848	32313432	50231726	43404972	0.524302	0.531487	0.416622	0.50325	0.588842	0.471947	0.513776	0.484637	0.546234	0.482388	0.517087	0.497825	0.497825	1.03204
[K].TNIEVEK.[L]		Ttn-203; A0A0A0MTS7	24810	24816	326xx	42617548	51867049	38032795	37929838	2.88621e+07	27389169	3.79813e+07	43373970	49531940	35949090	33445334	49303881	43373970	0.441529	0.452361	0.426879	0.519773	0.634091	0.502336	0.477348	0.484291	0.538503	0.490912	0.5352	0.48863	0.490912	0.97237
[K].GSDQWTHISTVK.[G]		Ttn-203	22921	22932	326xx	47148838	51677856	41997112	37826845	29341175	28500392	3.9912e+07	43174950	45866566	30799683	32285759	44116546	43174950	0.488474	0.450711	0.471374	0.518362	0.644617	0.522717	0.503418	0.482069	0.498654	0.420593	0.516644	0.43722	0.482069	1.04429
[R].KGFCQVNVVDRPGPPVGPVIFDEVTK.[E]	1xCarbamidomethyl [C4]	Ttn-203	18815	18840	297xx	46241014	55503330	33897015	35048927	28188248	2.48814e+07	34472971	43163998	49625389	36918077	31408983	45008696	43163998	0.479069	0.484075	0.380459	0.480294	0.619287	0.456342	0.479682	0.481946	0.539519	0.504145	0.502613	0.446062	0.502613	0.954375
[R].KGFCQVNVVDRPGPPVGPVIFDEVTK.[E]	1xCarbamidomethyl [C4]	Ttn-203	18815	18840	298xx	46241014	55503330	33897015	35048927	28188248	2.48814e+07	34472971	43163998	49625389	36918077	31408983	45008696	43163998	0.479069	0.484075	0.380459	0.480294	0.619287	0.456342	0.479682	0.481946	0.539519	0.504145	0.502613	0.446062	0.502613	0.954375
[K].ESFEVQWK.[R]		Ttn-203	14492	14499	246xx	32857824	54918944	29831372	35023448	28845270	27842774	31344598	43118968	47025528	38800804	34842268	47857356	43118968	0.340415	0.478978	0.334826	0.479945	0.633722	0.510656	0.479462	0.481444	0.511254	0.529855	0.557554	0.474294	0.511254	0.937815
[K].VIGSPNTPEGPLEYDDIQAR.[S]		Ttn-203	32138	32157	352xx	42009932	51871336	38599620	38417576	30758954	29567740	38508598	43090028	48050784	34268008	35723088	47861096	43090028	0.435234	0.452398	0.433241	0.526457	0.675765	0.542293	0.489427	0.48112	0.5224	0.467956	0.571649	0.474331	0.48112	1.01727
[K].DGGSPITNYIVEK.[R]		Ttn-203; A0A0A0MTS7	16024	16036	266xx	49541740	66043096	28805632	45387392	37419552	33809644	41403472	46041836	52525464	43014824	39328380	41519756	43014824	0.513265	0.575998	0.323313	0.621968	0.822096	0.620092	0.598045	0.514079	0.571048	0.5874	0.629341	0.411485	0.571048	1.04728
[K].NVTGTTSETIK.[V]		Ttn-203; A0A0A0MTS7	31729	31739	348xx	37693448	47044988	34978576	38173756	30358200	29110538	36336012	42967312	46459480	37917912	34926436	48851996	42967312	0.390514	0.410305	0.392598	0.523116	0.66696	0.533907	0.46671	0.47975	0.5051	0.517798	0.558901	0.484151	0.5051	0.923996
[K].NTVGEVGDVITIQVHDIPGPPTGPIK.[F]		Ttn-203	23056	23081	326xx	50539984	61965480	40572224	36637064	31071882	29413636	38604644	42953044	48426080	35695444	34180832	47285100	42953044	0.523607	0.540435	0.455381	0.502057	0.68264	0.539466	0.531537	0.479591	0.526481	0.487449	0.546969	0.468623	0.487449	1.09045
[R].EAFSSVIIK.[E]		Ttn-203; A0A0A0MTS7	30545	30553	339xx	41754188	55606544	31267660	39473148	34228288	30464564	36850718	44100408	51460868	42248980	37727864	42840880	42840880	0.432584	0.484975	0.350947	0.540922	0.751985	0.558741	0.512948	0.492402	0.559474	0.576942	0.60373	0.424578	0.559474	0.91684
[K].NAAGVISK.[G]		Ttn-203; A0A0A0MTS7	30934	30941	341xx	42459980	51341222	41513565	39003050	31284358	29078735	4.02583e+07	42826049	48072786	36146472	36241705	49160326	42826049	0.439896	0.447775	0.465947	0.53448	0.687308	0.533324	0.499635	0.478173	0.52264	0.493608	0.579948	0.487207	0.493608	1.01221
[K].GKPFPVCK.[W]	1xCarbamidomethyl [C7]	Ttn-203	32076	32083	352xx	2.20928e+07	2.9661e+07	32386085	33254509	30940684	28399963	3.03009e+07	39540200	45827560	39969714	42711908	5.78184e+07	42711908	0.228887	0.25869	0.3635	0.455704	0.679757	0.520875	0.409602	0.441485	0.49823	0.545817	0.683485	0.573013	0.545817	0.750439
[K].ATSYTITSLIENQEYK.[I]		Ttn-203	23727	23742	326xx	35961451	60190103	28664083	37984351	29114068	2.86745e+07	3.25378e+07	4.25731e+07	50802406	36816436	36610742	44745501	4.25731e+07	0.37257	0.524951	0.321725	0.52052	0.639627	0.525911	0.522735	0.475349	0.552316	0.502757	0.585853	0.443454	0.502757	1.03974
[K].HLTEGNQYLFR.[V]		Ttn-203	19286	19296	302xx	5.92197e+07	74617448	15685816	48246863	35432407	34338823	41839635	65299524	19594648	16524154	42566666	64178902	42566666	0.613531	0.650779	0.176057	0.661153	0.778439	0.629798	0.640289	0.7291	0.21303	0.22565	0.681161	0.63605	0.63605	1.00666
[K].SLSLQYSTK.[D]		Ttn-203	21849	21857	319xx	38423544	50332084	28454462	35794560	28488524	28031986	32141542	42428852	47971596	37576876	34079928	43240188	42428852	0.398078	0.438973	0.319372	0.490512	0.625884	0.514126	0.464743	0.473738	0.52154	0.513141	0.545355	0.428535	0.513141	0.905682
[K].NPVIAQDPK.[Q]		Ttn-203; A0A0A0MTS7	16483	16491	271xx	3.12167e+07	5.2165e+07	2.92851e+07	3.62218e+07	2.56046e+07	2.54427e+07	3.02509e+07	4.22596e+07	4.6066e+07	3.27591e+07	3.14997e+07	4.41583e+07	4.22596e+07	0.323413	0.454959	0.328695	0.496366	0.562524	0.466637	0.460798	0.471849	0.500822	0.44735	0.504066	0.437634	0.471849	0.97658
[R].ITDQYRPK.[W]		Ttn-203; A0A0A0MTS7	33956	33963	358xx	41030910	48109206	4.05293e+07	34507147	27863640	26860234	3.75182e+07	42244384	47715398	35052317	34559449	46011332	42244384	0.425091	0.419587	0.4549	0.47287	0.612156	0.492635	0.463885	0.471678	0.518754	0.478666	0.553028	0.455999	0.478666	0.96912
[R].NEEAIFDSSK.[Y]		Ttn-203; A0A0A0MTS7	14589	14598	247xx	39084552	47835600	33022932	37201220	26308542	2.72967e+07	35112076	42091288	42322556	34303544	31322314	47279732	42091288	0.404926	0.4172	0.370648	0.509788	0.577991	0.500641	0.458921	0.469969	0.460124	0.468441	0.501227	0.468569	0.468569	0.979408
[K].FGLSKPSEPSEPTVTK.[E]		Ttn-203	33114	33129	358xx	40466792	50627865	35580903	33627175	2.71956e+07	25877456	34604039	42010357	45714929	3.44197e+07	31265292	48684087	42010357	0.419246	0.441553	0.399359	0.460811	0.59748	0.47461	0.451182	0.469065	0.497005	0.470027	0.500314	0.482487	0.482487	0.935117
[K].VLDTPAACQK.[L]	1xCarbamidomethyl [C8]	Ttn-203; A0A0A0MTS7	29276	29285	335xx	40583212	49923580	37583108	34447116	28638586	26447726	36015112	41998228	43919432	36580912	34401832	46940704	41998228	0.420452	0.435411	0.421831	0.472047	0.629181	0.48507	0.453729	0.46893	0.477485	0.49954	0.550506	0.465209	0.477485	0.950248
[K].VHELAAEFISKPQNLEILEGEK.[A]		Ttn-203; A0A0A0MTS7	14461	14482	245xx	41385731	63783122	29274857	34764710	27297160	26747383	3.20198e+07	46012845	44234156	33375120	27917844	41969529	41969529	0.428767	0.556287	0.32858	0.4764	0.59971	0.490566	0.483483	0.513755	0.480907	0.455763	0.446747	0.415942	0.455763	1.06082
[K].VHELAAEFISKPQNLEILEGEK.[A]		Ttn-203; A0A0A0MTS7	14461	14482	246xx	41385731	63783122	29274857	34764710	27297160	26747383	3.20198e+07	46012845	44234156	33375120	27917844	41969529	41969529	0.428767	0.556287	0.32858	0.4764	0.59971	0.490566	0.483483	0.513755	0.480907	0.455763	0.446747	0.415942	0.455763	1.06082
[K].CTLAWSPPLQDGGSDISHYVVEK.[R]	1xCarbamidomethyl [C1]	Ttn-203	25650	25672	326xx	43752128	60819920	28620418	36413144	26051022	24455930	32516781	42774544	43088464	32171630	27043110	41909648	41909648	0.453283	0.530444	0.321234	0.498989	0.572333	0.448539	0.476136	0.477598	0.468451	0.439328	0.43275	0.415349	0.439328	1.08378
[K].GSDFWVEAGHTK.[Q]		Ttn-203; A0A0A0MTS7	30502	30513	339xx	46344020	61646832	32574422	31072049	25596230	22627917	3.18232e+07	42998379	41833248	31616019	28471076	43505104	41833248	0.480136	0.537655	0.365614	0.425797	0.562341	0.415012	0.452966	0.480097	0.454804	0.431741	0.4556	0.431161	0.454804	0.995959
[K].DAGEYTITATNPFGTK.[VE]		Ttn-203; A0A0A0MTS7	22360	22375	324xx	44395248	54617240	41879344	37423676	30952822	29003018	39651510	41683092	51471300	37062500	35696364	49302172	41683092	0.459946	0.476347	0.470052	0.512837	0.680024	0.531935	0.494592	0.465411	0.559588	0.506117	0.571221	0.488613	0.506117	0.977228
[K].EPGPPGTPFVTSISK.[D]		Ttn-203; A0A0A0MTS7	26418	26432	326xx	49318472	60593412	30882538	39066372	36821864	29196186	37944118	41588236	51215824	37836612	37767824	44570932	41588236	0.510952	0.528468	0.346624	0.535348	0.808965	0.535478	0.531908	0.464352	0.55681	0.516688	0.604369	0.441724	0.516688	1.02946
[R].SWQVVSEK.[C]		Ttn-203	30408	30415	339xx	3.9299e+07	49800581	3.69474e+07	35861062	2.80396e+07	2.68907e+07	3.64043e+07	4.15819e+07	46537161	36461791	3.47307e+07	4.83377e+07	4.15819e+07	0.407148	0.434338	0.414697	0.491423	0.616021	0.493194	0.462881	0.464282	0.505945	0.497914	0.555768	0.479055	0.497914	0.92964
[R].NAADNFSEPSESSGAITAR.[D]		Ttn-203	26595	26613	326xx	39666991	4.53325e+07	37085327	35958073	2.72287e+07	2.67428e+07	36521700	41532121	43697120	3.27572e+07	32629406	42674499	41532121	0.41096	0.395369	0.416244	0.492753	0.598205	0.490481	0.453363	0.463726	0.475068	0.447324	0.522143	0.422929	0.463726	0.977653
[K].GRPAPEVTWTK.[D]		Ttn-203; A0A0A0MTS7	22716	22726	326xx	39175358	51127102	32840273	33481547	30306797	28767456	33160910	41686204	41491102	37096591	32653868	44256548	41491102	0.405867	0.445907	0.368598	0.458816	0.665831	0.527615	0.452361	0.465446	0.451085	0.506582	0.522534	0.438608	0.465446	0.971888
[R].DSVNLTWTEPASDGGSK.[IV]		Ttn-203; A0A0A0MTS7	33050	33066	358xx	40877160	49659676	37835744	35537152	29589844	27521336	36686448	41453712	47010804	37077440	34048412	46988048	41453712	0.423498	0.433109	0.424667	0.486985	0.65008	0.50476	0.460047	0.46285	0.511094	0.506321	0.54485	0.465679	0.506321	0.908607
[K].LLTACECVVPNLK.[E]	2xCarbamidomethyl [C5; C7]	Ttn-203	17674	17686	283xx	37624280	49536112	33497626	37465396	31683272	29617754	35481511	41407484	46887308	38192508	37751520	47074108	41407484	0.389797	0.432031	0.375976	0.513409	0.696072	0.54321	0.47272	0.462334	0.509751	0.521548	0.604108	0.466531	0.509751	0.927354
[K].CVLSWLPPLDDGGAK.[I]	1xCarbamidomethyl [C1]	Ttn-203	23486	23500	326xx	34883132	58455836	30099724	36123856	25552980	25012198	32491428	41082500	44125676	32854716	30625534	44401924	41082500	0.361398	0.509825	0.337838	0.495025	0.561391	0.458741	0.476883	0.458705	0.479727	0.448656	0.490077	0.440049	0.458705	1.03963
[K].KQEPIAPESISSKPVIVTGLR.[D]		Ttn-203	34805	34825	358xx	44624438	41883606	44238336	29755071	24590522	23848744	3.58193e+07	42154526	43439072	30001963	28277227	41018452	41018452	0.462321	0.36529	0.496529	0.40775	0.540246	0.437402	0.449862	0.470675	0.472263	0.4097	0.452498	0.406516	0.452498	0.994173
[K].KQEPIAPESISSKPVIVTGLR.[D]		Ttn-203	34805	34825	358xx	44624438	41883606	44238336	29755071	24590522	23848744	3.58193e+07	42154526	43439072	30001963	28277227	41018452	41018452	0.462321	0.36529	0.496529	0.40775	0.540246	0.437402	0.449862	0.470675	0.472263	0.4097	0.452498	0.406516	0.452498	0.994173
[K].QLVGTNEWSR.[C]		Ttn-203; A0A0A0MTS7	16955	16964	276xx	37909024	44859500	36640056	36846380	28360352	26883178	36743218	40996588	43332580	34269808	34947264	42571972	40996588	0.392747	0.391244	0.411247	0.504926	0.623068	0.493056	0.452151	0.457746	0.471105	0.46798	0.559234	0.421913	0.46798	0.966176
[R].CDPPVISNITK.[D]	1xCarbamidomethyl [C1]	Ttn-203; A0A0A0MTS7	21405	21415	315xx	44987848	46011988	43552080	39615928	25184966	26861116	41584004	41543752	40910932	29980386	27734528	44878752	40910932	0.466086	0.401296	0.488827	0.542878	0.553306	0.492651	0.490739	0.463856	0.444777	0.409405	0.443814	0.444774	0.444774	1.10334
[K].IPIQDTK.[F]		Ttn-203	26471	26477	326xx	40423892	49854068	37190480	34703376	26503842	24543998	35946928	40788608	46592108	34178704	32384482	45117056	40788608	0.418802	0.434804	0.417424	0.475559	0.582281	0.450154	0.442479	0.455424	0.506542	0.466736	0.518224	0.447136	0.466736	0.948028
[R].VTATNTAGSTSCQAHLQVER.[L]	1xCarbamidomethyl [C12]	Ttn-203; A0A0A0MTS7	33781	33800	358xx	41519112	4.61182e+07	36090393	3.3755e+07	2.64043e+07	2.48303e+07	3.49227e+07	40759507	4.32212e+07	3.15982e+07	28434230	41514844	40759507	0.430149	0.402222	0.405077	0.462563	0.580094	0.455406	0.442777	0.455099	0.469894	0.431497	0.455011	0.411436	0.455011	0.973113
[R].AENAAGIGEPSR.[A]		Ttn-203	16570	16581	272xx	28731598	46502732	27243036	35779744	26097212	25789330	27987317	40708668	45954172	33219306	32544682	42744656	40708668	0.297667	0.405576	0.305775	0.490309	0.573348	0.472994	0.439285	0.454531	0.499606	0.453635	0.520787	0.423624	0.454531	0.966456
[K].CTVTPLTEGSLYVFR.[V]	1xCarbamidomethyl [C1]	Ttn-203; A0A0A0MTS7	16056	16070	266xx	43244471	5.50238e+07	3.40785e+07	3.63316e+07	2.87141e+07	2.87415e+07	3.52051e+07	4.08115e+07	4.20178e+07	32614194	3.21186e+07	40494584	40494584	0.448024	0.479893	0.382495	0.497872	0.63084	0.527139	0.488882	0.45568	0.456811	0.445372	0.513969	0.401325	0.45568	1.07286
[K].ALNLEEGIEYEFR.[V]		Ttn-203	25398	25410	326xx	4.11672e+07	6.03962e+07	33883312	33055500	29154726	27442900	33469406	40477516	44462468	3.65779e+07	3.72215e+07	4.95622e+07	40477516	0.426502	0.526748	0.380305	0.452977	0.64052	0.503322	0.47815	0.451951	0.483389	0.499499	0.595627	0.491189	0.491189	0.973452
[K].YILTLENSCGK.[K]	1xCarbamidomethyl [C9]	Ttn-203; A0A0A0MTS7	21678	21688	317xx	45084312	58312728	37582896	39432048	30748370	29806190	38507472	40357344	48895256	37531988	33977372	45551316	40357344	0.467085	0.508577	0.421829	0.540359	0.675532	0.546666	0.524468	0.450609	0.531581	0.512528	0.543713	0.45144	0.512528	1.0233
[K].NTATVSWK.[R]		Ttn-203; A0A0A0MTS7	22500	22507	325xx	38098374	44976576	38311814	33554425	26371239	25759408	3.58264e+07	40085416	44722522	34315912	32635923	43858441	40085416	0.394709	0.392265	0.43001	0.459814	0.579368	0.472445	0.444912	0.447573	0.486216	0.46861	0.522247	0.434662	0.46861	0.94943
[K].DGVHDIPEDAQLETAENSSVIIIPECTR.[A]	1xCarbamidomethyl [C26]	Ttn-203	17770	17797	286xx	39702428	52770588	35134136	32782700	26953316	24375146	33958418	39995244	42351912	31265290	30540814	44570580	39995244	0.411327	0.460241	0.394344	0.449239	0.592156	0.447057	0.448148	0.446566	0.460443	0.426951	0.488721	0.44172	0.446566	1.00354
[K].TSCHVSWAPPENDGGSQVTHYIVEK.[R]	1xCarbamidomethyl [C3]	Ttn-203; A0A0A0MTS7	20627	20651	307xx	53621314	62804646	2.71342e+07	39563327	27813801	2.51611e+07	33688564	40936750	47331356	34392759	2.62506e+07	39876182	39876182	0.555531	0.547753	0.304553	0.542158	0.611061	0.461473	0.544955	0.457078	0.514579	0.469659	0.420068	0.395196	0.457078	1.19226
[K].GWSIVASDVTK.[R]		Ttn-203; A0A0A0MTS7	19961	19971	304xx	41026544	58891224	33683244	32320240	29016566	25922572	33001742	39833652	43663504	38745792	33311252	45432788	39833652	0.425045	0.513622	0.378059	0.442902	0.637485	0.475438	0.45917	0.444762	0.474703	0.529103	0.533054	0.450265	0.474703	0.967279
[K].EADRNDSGTYDLVLENK.[C]		Ttn-203	32110	32126	352xx	40261379	46520831	37229447	33564657	27724206	2.74083e+07	35397052	39473086	45707388	3.59066e+07	33160563	47274030	39473086	0.417118	0.405733	0.417862	0.459955	0.609092	0.502687	0.438908	0.440736	0.496923	0.490332	0.530643	0.468513	0.490332	0.895124
[R].YFLTLENTAGVK.[T]		Ttn-203; A0A0A0MTS7	30632	30643	339xx	32031548	56674520	21978042	31352250	31599992	26137926	31476121	39455456	42685848	36267640	35533952	45843656	39455456	0.331855	0.494289	0.246681	0.429637	0.694242	0.479388	0.454512	0.440539	0.464074	0.495262	0.568622	0.454337	0.464074	0.979396
[R].KVGIDNVVR.[K]		Ttn-203; A0A0A0MTS7	20556	20564	306xx	36090502	42944526	32812244	30504970	25646620	24309765	31658607	40444754	39357638	32601659	29436597	41204922	39357638	0.373907	0.374543	0.368283	0.418026	0.563448	0.445858	0.396284	0.451585	0.42789	0.445201	0.471051	0.408364	0.445201	0.890125
[R].ADIHTTDSFSTLTVENCNR.[N]	1xCarbamidomethyl [C17]	Ttn-203; A0A0A0MTS7	30316	30334	339xx	4.02927e+07	51160730	31754554	31330409	27585144	25073762	3.15425e+07	39269115	42671527	33786882	2.98579e+07	3.95945e+07	39269115	0.417443	0.4462	0.356412	0.429337	0.606037	0.45987	0.437769	0.438458	0.463918	0.461386	0.477793	0.392404	0.461386	0.948813
[K].AAWYTIDSR.[V]		Ttn-203; A0A0A0MTS7	32187	32195	352xx	39021152	49705488	33699612	35377592	27640916	27769722	34538602	39203704	45662692	36246076	34420760	44791340	39203704	0.404269	0.433509	0.378243	0.484798	0.607262	0.509316	0.459153	0.437728	0.496438	0.494968	0.550809	0.443908	0.494968	0.927643
[R].LNSGSYELK.[L]		Ttn-203	28852	28860	331xx	38226128	45418492	32936670	33101342	25635744	24716408	33019006	39130520	43712528	33370188	30389102	41035320	39130520	0.396032	0.396119	0.36968	0.453606	0.563209	0.453316	0.424718	0.436911	0.475236	0.455695	0.486293	0.406684	0.455695	0.932021
[R].DGGSPITGYLVEYQEEGDKDWIK.[F]		Ttn-203	19350	19372	303xx	40166304	52777784	19358960	31273584	29112276	27333062	30192930	38889696	44833940	38427128	32445056	44231632	38889696	0.416133	0.460304	0.217284	0.428559	0.639588	0.501307	0.444431	0.434222	0.487427	0.524752	0.519193	0.438361	0.487427	0.911789
[R].VLPENIYGIGEPCETSDAVLVSEVPLVPTK.[L]	1xCarbamidomethyl [C13]	Ttn-203	31525	31554	347xx	3.89838e+07	52900485	3.33403e+07	3.26006e+07	25501212	2.45979e+07	3.29705e+07	3.87921e+07	4.36595e+07	33739115	3.02154e+07	43940619	3.87921e+07	0.403883	0.461374	0.374211	0.446744	0.560254	0.451143	0.448944	0.433132	0.474659	0.460733	0.483514	0.435477	0.460733	0.974411
[K].ITHYIVEK.[R]		Ttn-203; A0A0A0MTS7	28912	28919	332xx	42805398	54147076	23527530	35175365	28234745	2.57174e+07	31705055	39981230	45298661	33125831	28429813	38775422	38775422	0.443475	0.472246	0.264072	0.482027	0.620309	0.471675	0.471961	0.446409	0.49248	0.452359	0.45494	0.384287	0.452359	1.04333
[R].VFAENLAGLSNPSPSSDPIK.[A]		Ttn-203	19691	19710	304xx	42157466	50005060	31361678	40846092	17490820	16638811	36103885	38629236	51298016	18523304	15923734	40746548	38629236	0.436762	0.436121	0.352002	0.559736	0.384268	0.305167	0.410195	0.431314	0.557704	0.25295	0.254815	0.403822	0.403822	1.01578
[R].DLEVSEIR.[K]		Ttn-203; A0A0A0MTS7	19229	19236	302xx	36704756	47934080	33963652	35540944	29443140	28276186	34752298	38454360	44008748	37701112	35601684	44245876	38454360	0.380271	0.418059	0.381207	0.487037	0.646857	0.518605	0.452548	0.429361	0.478456	0.514838	0.569706	0.438502	0.478456	0.94585
[K].WVTCASAVQK.[T]	1xCarbamidomethyl [C4]	Ttn-203; A0A0A0MTS7	22037	22046	320xx	36631112	45448388	33319840	32605420	26495470	24393126	32962630	38402940	44160348	33413996	30951712	44282896	38402940	0.379508	0.39638	0.373981	0.44681	0.582097	0.447387	0.421595	0.428787	0.480104	0.456294	0.495296	0.438869	0.456294	0.923955
[K].VTNYIVEK.[C]		Ttn-203	33067	33074	358xx	38715756	49046872	27979834	35139044	27708438	25267298	31559439	40702308	47432788	35289608	31342530	38208184	38208184	0.401105	0.427764	0.314045	0.481529	0.608746	0.46342	0.445592	0.45446	0.515682	0.481907	0.50155	0.378665	0.481907	0.924644
[K].LIEHQEYK.[I]		Ttn-203	25899	25906	326xx	38699682	49030438	32148643	31693859	23958414	2.19741e+07	31921251	38194716	40767207	29276263	27213194	41835635	38194716	0.400939	0.427621	0.360835	0.434318	0.526359	0.40302	0.415321	0.426462	0.443215	0.39979	0.435472	0.414615	0.426462	0.973875
[K].NSVNLSWQQPAFDGGSK.[I]		Ttn-203	28696	28712	330xx	40359396	41459920	36125608	33874488	26991078	26684930	35000048	38175472	44741748	30852926	32597308	45727840	38175472	0.418134	0.361594	0.405472	0.4642	0.592986	0.48942	0.441167	0.426247	0.486425	0.42132	0.521629	0.453189	0.453189	0.973472
[R].VTGYYIER.[K]		Ttn-203; A0A0A0MTS7	32275	32282	353xx	40032644	50822084	26353052	36803372	27712148	26739564	32257760	39975336	45544496	34890556	32486046	38149828	38149828	0.414748	0.443247	0.295786	0.504336	0.608827	0.490422	0.466835	0.446343	0.495153	0.476457	0.519849	0.378087	0.476457	0.979804
[K].IEALPSDISIDEGK.[V]		Ttn-203; A0A0A0MTS7	35297	35310	363xx	47344624	44165904	43790704	31710396	24603748	25949890	37750550	39281036	40008356	28261420	28370998	38096732	38096732	0.490502	0.385195	0.491505	0.434545	0.540537	0.475939	0.483221	0.438591	0.434964	0.385931	0.453999	0.377561	0.434964	1.11094
[K].QVVDDTCTLVIPQSR.[R]	1xCarbamidomethyl [C7]	Ttn-203	18087	18101	289xx	35937756	42546004	36175784	35189676	25605050	26198516	35563716	37648480	44550208	30085036	32388738	43011112	37648480	0.372324	0.371067	0.406036	0.482223	0.562535	0.480499	0.443267	0.420363	0.484343	0.410834	0.518292	0.426265	0.426265	1.03989
[R].VLACNAGGPGEPAEVPGTVK.[V]	1xCarbamidomethyl [C4]	Ttn-203; A0A0A0MTS7	32021	32040	351xx	40659368	45574828	38411784	31262356	24616922	22322406	34837070	37442580	42810472	29427108	28845992	42734984	37442580	0.421241	0.397483	0.431132	0.428405	0.540826	0.409408	0.424823	0.418064	0.465429	0.40185	0.4616	0.423528	0.423528	1.00306
[RK].CVENQIYEFR.[V]	1xCarbamidomethyl [C1]	Ttn-203; A0A0A0MTS7	20079	20088	304xx	37169460	46585860	34098372	34569424	24361330	24394550	34333898	37427444	41079500	30480856	29085504	41734548	37427444	0.385085	0.406301	0.382719	0.473723	0.535211	0.447413	0.426857	0.417895	0.44661	0.416239	0.465433	0.413613	0.417895	1.02144
[K].VDQLQEGCSYYFR.[V]	1xCarbamidomethyl [C8]	Ttn-203; A0A0A0MTS7	23926	23938	326xx	38082684	49907524	32813054	34984524	27977340	26933822	33898789	37125608	44451896	33827972	33694432	41316456	37125608	0.394546	0.435271	0.368292	0.479412	0.614654	0.493985	0.457341	0.414525	0.483274	0.461947	0.539186	0.40947	0.461947	0.99003
[R].DTGQYVLTLK.[N]		Ttn-203; A0A0A0MTS7	27770	27779	326xx	34411172	43211016	36840380	33636568	24218442	25236098	34023870	37073440	43544916	35471184	32180716	41438408	37073440	0.356509	0.376867	0.413495	0.46094	0.532072	0.462847	0.437217	0.413942	0.473413	0.484386	0.514963	0.410678	0.473413	0.923543
[K].VQNLLPGHEYQFR.[V]		Ttn-203	20371	20383	304xx	39751429	59054475	30256587	33419307	31873864	2.52546e+07	3.26466e+07	37759039	46211932	3.24813e+07	26539831	37036009	37036009	0.411835	0.515046	0.339599	0.457963	0.700259	0.463187	0.460575	0.421597	0.502409	0.443556	0.424696	0.367048	0.424696	1.08448
[K].CDITGLIEGQEYK.[F]	1xCarbamidomethyl [C1]	Ttn-203; A0A0A0MTS7	17168	17180	278xx	34829716	50176184	38090908	35781320	25136870	24224634	35305518	36960224	39289408	31314496	29649096	38322244	36960224	0.360845	0.437614	0.427531	0.490331	0.552249	0.444297	0.440955	0.412678	0.427148	0.427623	0.474451	0.379795	0.427148	1.03232
[R].DTSTTAWQIVSATVAR.[T]		Ttn-203	24196	24211	326xx	33849558	49022490	29654897	30835172	30964909	2.7288e+07	3.09e+07	36554753	38726877	36927219	33831412	43778984	36927219	0.35069	0.427552	0.332845	0.422551	0.68029	0.500481	0.425051	0.408151	0.421032	0.504269	0.541378	0.433875	0.433875	0.979663
[K].SLDAVITNLTQGEEYLFR.[V]		Ttn-203	25099	25116	326xx	33823999	54758414	2.58046e+07	28419693	27320827	2.4952e+07	27870260	36914651	37199465	33341644	2.93925e+07	40998244	36914651	0.350425	0.477578	0.28963	0.38945	0.60023	0.457636	0.423543	0.412169	0.404427	0.455306	0.470346	0.406316	0.412169	1.0276
[K].DGNELEETAAR.[M]		Ttn-203	26658	26668	326xx	32938708	43840780	28220752	31897390	27281870	23914290	30059071	36840936	43821084	31689506	30664884	42845872	36840936	0.341253	0.382359	0.316749	0.437107	0.599374	0.438605	0.409733	0.411346	0.476416	0.432744	0.490706	0.424627	0.432744	0.946825
[K].LIIHGCTPEDIK.[T]	1xCarbamidomethyl [C6]	Ttn-203	14255	14266	242xx	33371111	46210364	3.19832e+07	3.20729e+07	2.40538e+07	2.40243e+07	3.20281e+07	36730062	40956560	2.93182e+07	2.83686e+07	40296091	36730062	0.345733	0.403026	0.358979	0.439512	0.528454	0.440622	0.421269	0.410108	0.445273	0.400362	0.453961	0.399357	0.410108	1.02721
[R].FTNITGEK.[M]		Ttn-203; A0A0A0MTS7	29975	29982	338xx	39192080	43734828	35563768	32008360	25162282	25103166	33786064	36689880	41057456	32435244	30325232	40733304	36689880	0.40604	0.381435	0.399166	0.438628	0.552808	0.460409	0.422334	0.40966	0.44637	0.442928	0.485271	0.40369	0.442928	0.953504
[K].NTAGAISAPSESTGTIICKDEYEAPTIVLDPTIK.[D]	1xCarbamidomethyl [C18]	Ttn-203	22266	22299	323xx	40699775	4.40834e+07	30714822	32199337	23138749	22324093	3.14571e+07	36289272	43194080	2.91461e+07	2.65949e+07	41133746	36289272	0.42166	0.384475	0.344742	0.441245	0.508351	0.409439	0.41555	0.405187	0.469599	0.398013	0.425577	0.407659	0.407659	1.01936
[K].NTAGAISAPSESTGTIICKDEYEAPTIVLDPTIK.[D]	1xCarbamidomethyl [C18]	Ttn-203	22266	22299	324xx	40699775	4.40834e+07	30714822	32199337	23138749	22324093	3.14571e+07	36289272	43194080	2.91461e+07	2.65949e+07	41133746	36289272	0.42166	0.384475	0.344742	0.441245	0.508351	0.409439	0.41555	0.405187	0.469599	0.398013	0.425577	0.407659	0.407659	1.01936
[K].VLDKPGPPAGPLEINGLTAEK.[C]		Ttn-203; A0A0A0MTS7	27793	27813	326xx	32413908	38914032	38018908	26627638	20721736	20921514	29520773	36275884	38743176	31461856	28032722	41105692	36275884	0.335816	0.33939	0.426723	0.364893	0.45525	0.383715	0.374304	0.405037	0.42121	0.429636	0.448586	0.407381	0.42121	0.88864
[K].WIAVTTEEIR.[E]		Ttn-203	32785	32794	357xx	35014188	50282828	26941832	27891614	28008528	26052532	27950071	36206548	38486556	34150972	29861970	42366876	36206548	0.362756	0.438544	0.302394	0.382214	0.615339	0.477821	0.410379	0.404263	0.41842	0.466358	0.477858	0.41988	0.41988	0.977371
[K].NAAGAISPPSEPSDAITCR.[D]	1xCarbamidomethyl [C18]	Ttn-203; A0A0A0MTS7	23349	23367	326xx	36346808	44379480	31732818	31589412	27184476	26719014	31661115	36172864	40037536	30651022	30495978	41939200	36172864	0.376562	0.387058	0.356168	0.432887	0.597235	0.490045	0.409972	0.403887	0.435282	0.418563	0.488003	0.415642	0.418563	0.979475
[R].EGQVVSTSAR.[H]		Ttn-203	34511	34520	358xx	36441936	40168356	31693498	30436130	25777704	24077392	31064814	36159468	39119396	30345264	29482350	38905808	36159468	0.377548	0.35033	0.355727	0.417083	0.566328	0.441596	0.397315	0.403738	0.4253	0.414388	0.471783	0.385579	0.414388	0.9588
[K].WTTDGTEIK.[T]		Ttn-203	19458	19466	304xx	43240489	40522728	39961988	33574506	2.41463e+07	25092072	36768247	35863703	39864506	3.03221e+07	27568498	38836566	35863703	0.447983	0.353421	0.448532	0.46009	0.530486	0.460206	0.454311	0.400435	0.433401	0.414071	0.441157	0.384893	0.414071	1.09718
[R].VSAENAAGVGEPSPATVYYK.[A]		Ttn-203; A0A0A0MTS7	25807	25826	326xx	40200468	46546832	34537640	31372550	24023526	22711046	32955095	35801692	42612428	28253134	28532120	40192472	35801692	0.416487	0.40596	0.387649	0.429915	0.52779	0.416536	0.416512	0.399743	0.463276	0.385818	0.456577	0.398331	0.399743	1.04195
[R].EAAILYKPAVSTK.[T]		Ttn-203	33850	33862	358xx	36266826	36939206	39295238	33358454	26601192	26387120	34812640	34811600	37585330	35800414	34005322	40428400	35800414	0.375734	0.322167	0.441048	0.457129	0.58442	0.483958	0.449089	0.388688	0.408622	0.488882	0.544161	0.400669	0.408622	1.09903
[K].WSVVAESK.[V]		Ttn-203	26173	26180	326xx	34402372	43667692	30968526	29737718	21694314	21327914	30353122	35691224	38901848	30450202	27190846	39446632	35691224	0.356417	0.38085	0.34759	0.407512	0.476617	0.391169	0.386009	0.398509	0.422935	0.415821	0.435114	0.390939	0.415821	0.928307
[K].DDGGSEITNYVLEK.[R]		Ttn-203	22016	22029	320xx	37192364	54572000	20313034	35599920	31502364	28324054	33551142	37042932	43832936	32897684	31985552	35440820	35440820	0.385322	0.475952	0.227993	0.487845	0.692097	0.519483	0.481898	0.413602	0.476545	0.449243	0.51184	0.351239	0.449243	1.07269
[R].ISCGGAIR.[S]	1xCarbamidomethyl [C3]	Ttn-203; A0A0A0MTS7	33457	33464	358xx	30322536	40259936	2.78531e+07	29688010	24814584	21538502	2.87706e+07	35424080	39112176	29715958	28821432	39519664	35424080	0.314149	0.351129	0.312622	0.406831	0.545169	0.395031	0.37308	0.395527	0.425221	0.405794	0.461207	0.391663	0.405794	0.919382
[K].LTWEPPEFDGGSPILHYVLER.[R]		Ttn-203	16412	16432	271xx	33382096	51794084	20843428	24695744	25189168	18708498	24942456	36421392	37191036	30744496	26341096	35414324	35414324	0.345847	0.451724	0.233946	0.338419	0.553398	0.343127	0.344487	0.406662	0.404335	0.41984	0.421516	0.350976	0.406662	0.847109
[K].QGDEEEWTIVSTR.[G]		Ttn-203	29121	29133	334xx	34400204	45296868	30543914	32665738	26676508	25215770	31604826	35316312	39866796	30538816	29909822	42162140	35316312	0.356395	0.395059	0.342824	0.447636	0.586075	0.462475	0.421347	0.394323	0.433425	0.417031	0.478624	0.417851	0.417851	1.00837
[R].VAAENQYGR.[G]		Ttn-203; A0A0A0MTS7	19297	19305	302xx	24778860	31261014	29745744	33735908	26135444	25589552	27940594	33383156	51464692	35265476	30801848	40171808	35265476	0.256715	0.272644	0.333865	0.462301	0.574188	0.46933	0.398083	0.372739	0.559516	0.481577	0.492898	0.398126	0.481577	0.826624
[R].VSAENAAGLSEPSPPSAYQK.[A]		Ttn-203; A0A0A0MTS7	24725	24744	326xx	35550084	43802456	33850080	29925138	24482534	23751148	31887609	35025812	38461624	27326564	28813636	40274660	35025812	0.368308	0.382025	0.379932	0.41008	0.537874	0.435612	0.396053	0.39108	0.418149	0.373165	0.461082	0.399145	0.399145	0.992252
[K].VSECYVAR.[D]	1xCarbamidomethyl [C4]	Ttn-203; A0A0A0MTS7	26507	26514	326xx	33684716	40434936	27417484	31616906	25317822	23509808	29517195	34971248	40269888	31701654	28996608	36369436	34971248	0.348982	0.352655	0.307733	0.433263	0.556225	0.431186	0.391921	0.39047	0.437808	0.43291	0.46401	0.360442	0.43291	0.905316
[K].YCVVVENSTGSR.[K]	1xCarbamidomethyl [C2]	Ttn-203; A0A0A0MTS7	18803	18814	297xx	35947624	42613864	29427734	28814180	23725968	22857184	29120957	34851168	39205508	28423830	26616118	36220712	34851168	0.372427	0.371659	0.330296	0.394856	0.521252	0.419217	0.383641	0.38913	0.426236	0.388149	0.425917	0.358968	0.38913	0.985896
[R].YGVSGSDQTLTIK.[Q]		Ttn-203; A0A0A0MTS7	35051	35063	360xx	44244800	40507412	41021768	28768584	22826166	24022780	34637998	35791880	35919804	26360228	25025724	34811580	34811580	0.458387	0.353287	0.460427	0.394231	0.501484	0.440594	0.449491	0.399633	0.390514	0.359969	0.400467	0.345003	0.390514	1.15102
[K].KGDDEVVTSSHLAIHK.[A]		Ttn-203	20848	20863	309xx	39615284	47281523	31448174	2.72286e+07	2.00417e+07	1.82362e+07	2.93384e+07	36168228	35686230	2.41544e+07	2.13176e+07	34646156	34646156	0.410424	0.412368	0.352973	0.373128	0.44031	0.334464	0.391776	0.403835	0.387975	0.329847	0.341129	0.343363	0.343363	1.141
[K].VLDSPGPCGK.[L]	1xCarbamidomethyl [C8]	Ttn-203; A0A0A0MTS7	31051	31060	342xx	32529066	41548292	29472584	28550706	23045604	22721252	29011645	34630708	37180860	30042018	29056868	38773060	34630708	0.337009	0.362365	0.330799	0.391246	0.506305	0.416723	0.376805	0.386668	0.404224	0.410247	0.464974	0.384263	0.404224	0.932169
[K].VLDSPGPCGK.[L]	1xCarbamidomethyl [C8]	Ttn-203; A0A0A0MTS7	31051	31060	343xx	32529066	41548292	29472584	28550706	23045604	22721252	29011645	34630708	37180860	30042018	29056868	38773060	34630708	0.337009	0.362365	0.330799	0.391246	0.506305	0.416723	0.376805	0.386668	0.404224	0.410247	0.464974	0.384263	0.404224	0.932169
[K].VTGLIEGSDYQFR.[V]		Ttn-203; A0A0A0MTS7	18296	18308	291xx	34839836	45369252	33870788	36472404	12066799	13731256	34355312	41752244	54693048	19408208	18186986	34462092	34462092	0.36095	0.39569	0.380164	0.499801	0.265104	0.251841	0.370557	0.466183	0.594614	0.265034	0.291032	0.341539	0.341539	1.08496
[K].VTGEPQPTITWTK.[D]		Ttn-203	34841	34853	358xx	38182916	36858720	36469676	27122794	21966146	21851160	31796235	34429024	36621032	26090216	26590082	34915932	34429024	0.395585	0.321465	0.409334	0.371678	0.48259	0.400765	0.398175	0.384416	0.398138	0.356282	0.4255	0.346037	0.384416	1.03579
[K].EVAPDFELDAELR.[R]		Ttn-203	22685	22697	326xx	28582438	46926116	21216408	29417260	30440828	26844102	28999849	32024508	35382912	34419128	32072132	38955056	34419128	0.296121	0.409268	0.238132	0.403121	0.668776	0.492339	0.406194	0.357569	0.384677	0.47002	0.513225	0.386067	0.386067	1.05213
[K].DSVTLSWEPPLIDGGAK.[I]		Ttn-203; A0A0A0MTS7	27127	27143	326xx	33953612	42443656	30420058	28728328	22518908	23544718	29574193	34406504	37940604	28335058	28847828	39608096	34406504	0.351768	0.370174	0.341434	0.39368	0.494734	0.431826	0.381927	0.384165	0.412484	0.386937	0.461629	0.392539	0.392539	0.972966
[R].LSINNSK.[Q]		Ttn-203	16668	16674	273xx	31842196	35257928	32854226	27244540	20566340	21214818	29543368	34368584	37799224	27951520	26685012	38159224	34368584	0.329893	0.307504	0.368755	0.373347	0.451836	0.389094	0.371051	0.383741	0.410947	0.381699	0.427019	0.37818	0.383741	0.966929
[K].VVNDYGEDSSYAELFVK.[G]		Ttn-203; A0A0A0MTS7	33557	33573	358xx	32944408	44346844	26491264	27103128	23917864	23933186	26797196	34166028	39681132	29184900	28569120	36724612	34166028	0.341312	0.386773	0.297337	0.371409	0.525468	0.438951	0.379091	0.38148	0.431407	0.398542	0.457169	0.363962	0.398542	0.951194
[R].FILNVQSKPTAEVK.[W]		Ttn-203; A0A0A0MTS7	34307	34320	358xx	37004750	36235633	37806200	27208338	1.9715e+07	20784509	3.1722e+07	3.40979e+07	40543611	28193338	2.54298e+07	39233801	3.40979e+07	0.383379	0.316031	0.424335	0.372851	0.433133	0.381202	0.38229	0.380719	0.440784	0.385002	0.406933	0.38883	0.38883	0.983183
[K].SSWEFDGK.[A]		Ttn-203; A0A0A0MTS7	17756	17763	284xx	32063682	37574928	30355518	27591180	20559146	20794630	28973349	34024700	35891784	28406976	25941420	35766212	34024700	0.332188	0.327711	0.340709	0.378097	0.451678	0.381388	0.359403	0.379902	0.39021	0.387919	0.41512	0.354464	0.387919	0.92649
[K].YTIEAENQSGK.[K]		Ttn-203; A0A0A0MTS7	31429	31439	346xx	27932260	44598536	27209590	28092756	37720060	21220506	28012508	30155362	33879644	26771944	45608810	35774048	33879644	0.289385	0.388968	0.305399	0.38497	0.828698	0.389199	0.386969	0.336699	0.368334	0.365591	0.729842	0.354541	0.365591	1.05847
[R].CNAAAQLIR.[M]	1xCarbamidomethyl [C1]	Ttn-203	20465	20473	305xx	32810466	39489472	32077078	29130968	21132920	21572540	30604023	33639992	34578852	26088966	23755052	36331300	33639992	0.339925	0.344409	0.360032	0.399197	0.464284	0.395655	0.377844	0.375606	0.375936	0.356265	0.380134	0.360064	0.375606	1.00596
[R].FNTEITAENLTINLK.[E]		Ttn-203; A0A0A0MTS7	28437	28451	328xx	29362327	45649352	2.35993e+07	2.4156e+07	2.27917e+07	2.48187e+07	2.44874e+07	36028438	37750584	30291211	3.16231e+07	3.35485e+07	3.35485e+07	0.304201	0.398133	0.264878	0.331023	0.500727	0.455192	0.364578	0.402275	0.410418	0.41365	0.50604	0.332485	0.410418	0.888308
[R].DTTTTVWDVVSATVAR.[T]		Ttn-203; A0A0A0MTS7	25278	25293	326xx	30122216	44528715	27392610	26546619	27838245	24927705	2.76154e+07	31926551	35994641	33542790	32008910	40003282	33542790	0.312074	0.388359	0.307454	0.363783	0.611598	0.457191	0.376071	0.356475	0.391328	0.458052	0.512214	0.396456	0.396456	0.948583
[R].DEVEPPR.[I]		Ttn-203	24450	24456	326xx	30025338	36567472	30092156	29874024	21627386	21471470	29949681	33425002	37087992	28820144	27108928	37511012	33425002	0.31107	0.318925	0.337753	0.40938	0.475147	0.393802	0.365777	0.373206	0.403215	0.393561	0.433803	0.371756	0.393561	0.929404
[K].CREPVNPPSAPSVVK.[V]	1xCarbamidomethyl [C1]	Ttn-203	30161	30175	339xx	32268890	39712824	29925946	2.77475e+07	2.0894e+07	19722208	2.88367e+07	33424017	33833091	2.56401e+07	2.299e+07	35782399	33424017	0.334314	0.346357	0.335888	0.380239	0.459034	0.361719	0.354038	0.373195	0.367828	0.350136	0.367891	0.354624	0.367828	0.96251
[R].ETQAVNWTK.[V]		Ttn-203; A0A0A0MTS7	21442	21450	315xx	31831296	36648880	31223336	28977904	23248700	22368808	30100620	33362726	37834460	30307542	28202604	37587712	33362726	0.32978	0.319635	0.350449	0.3971	0.510767	0.410259	0.373775	0.372511	0.41133	0.413873	0.451304	0.372516	0.41133	0.908697
[R].IHHYVIEK.[R]		Ttn-203	30394	30401	339xx	34618188	45700424	23525340	25489872	19774420	18113790	24507606	36465172	33291278	25477930	22065614	34126192	33291278	0.358653	0.398578	0.264047	0.349301	0.434438	0.332219	0.353977	0.407151	0.361937	0.347921	0.353099	0.33821	0.353099	1.00249
[K].GKPKPSISWLK.[D]		Ttn-203; A0A0A0MTS7	29503	29513	335xx	28399991	42989569	21544687	2.42388e+07	24901015	19968881	2.45699e+07	3.32715e+07	35710690	2.99044e+07	2.55101e+07	37091753	3.32715e+07	0.294231	0.374935	0.241817	0.332158	0.547068	0.366243	0.3492	0.371492	0.388241	0.408368	0.408219	0.367601	0.388241	0.899442
[K].RDDQTLESGDKYDIIADGK.[K]		Ttn-203	14500	14518	246xx	32464922	39467100	28320762	29700784	22175504	20970146	29010773	33213050	36687852	27173728	23353240	36258504	33213050	0.336345	0.344214	0.317871	0.407006	0.487189	0.384607	0.36441	0.370839	0.398864	0.371078	0.373704	0.359343	0.371078	0.982032
[R].YQSNATLVCK.[V]	1xCarbamidomethyl [C9]	Ttn-203; A0A0A0MTS7	32855	32864	357xx	33666896	41144900	30225496	28815728	22085644	21028260	29520612	33005974	36829504	27764590	26631890	38004696	33005974	0.348798	0.358847	0.33925	0.394877	0.485215	0.385673	0.37226	0.368527	0.400405	0.379147	0.426169	0.376648	0.379147	0.981836
[K].DTGEYQLTVSNAAGTK.[T]		Ttn-203	19491	19506	304xx	31008212	35209844	31225000	27404168	20684080	21679374	29206190	33650816	32869414	25785678	25069508	36985188	32869414	0.321253	0.307084	0.350468	0.375534	0.454423	0.397615	0.363001	0.375727	0.357351	0.352123	0.401168	0.366544	0.366544	0.990333
[K].VNPNCGSTTFVVPDLISEQQYFFR.[V]	1xCarbamidomethyl [C5]	Ttn-203	17875	17898	287xx	31644059	42383222	26375247	26542134	2.22437e+07	21141564	2.64587e+07	32691819	38134939	29184748	27212971	36027121	32691819	0.327841	0.369647	0.296035	0.363721	0.488688	0.387751	0.366684	0.36502	0.414597	0.39854	0.435468	0.357049	0.39854	0.920068
[K].DLIPNGEYFFR.[V]		Ttn-203; A0A0A0MTS7	16456	16466	271xx	30456828	43161764	28826888	25884380	22487526	21885226	27355634	32560082	39390468	29835666	26947200	39258556	32560082	0.315541	0.376437	0.323552	0.354708	0.494044	0.40139	0.365572	0.363549	0.428247	0.407429	0.431215	0.389075	0.407429	0.897267
[K].ITDVSSDR.[C]		Ttn-203	20219	20226	304xx	30172358	36999976	29323524	28650630	18987766	20253782	28987077	32844476	32390896	24637982	23513800	36327452	32390896	0.312593	0.322697	0.329126	0.392615	0.417155	0.371468	0.350297	0.366724	0.352149	0.336451	0.376273	0.360026	0.360026	0.972978
[K].GTDQVLVK.[K]		Ttn-203; A0A0A0MTS7	33200	33207	358xx	30691188	40948760	24724566	26745992	21515928	20381946	25735279	32312878	32617418	28046696	24403352	35287908	32312878	0.317969	0.357136	0.277508	0.366515	0.472698	0.373819	0.361826	0.360789	0.354611	0.382999	0.390508	0.349723	0.360789	1.00287
[K].NPYDPPGR.[C]		Ttn-203; A0A0A0MTS7	21397	21404	314xx	28161520	32753372	27903586	26403344	20033550	19611044	27153465	32312258	32765494	23858744	24807762	33302790	32312258	0.291761	0.28566	0.313189	0.361819	0.440131	0.35968	0.336434	0.360782	0.356221	0.325809	0.396979	0.33005	0.356221	0.944454
[K].NPYDPPGR.[C]		Ttn-203; A0A0A0MTS7	21397	21404	315xx	28161520	32753372	27903586	26403344	20033550	19611044	27153465	32312258	32765494	23858744	24807762	33302790	32312258	0.291761	0.28566	0.313189	0.361819	0.440131	0.35968	0.336434	0.360782	0.356221	0.325809	0.396979	0.33005	0.356221	0.944454
[K].DPIEPPGPPTNFK.[V]		Ttn-203	20406	20418	304xx	33292396	45178956	28368084	28358068	27753330	23744448	28363076	34405624	41983580	30090560	25624642	NA	32248092	0.344918	0.39403	0.318402	0.388606	0.609732	0.43549	0.391318	0.384155	0.456439	0.41091	0.410051		0.41048	0.953317
[K].DPIEPPGPPTNFK.[V]		Ttn-203	20406	20418	305xx	33292396	45178956	28368084	28358068	27753330	23744448	28363076	34405624	41983580	30090560	25624642	NA	32248092	0.344918	0.39403	0.318402	0.388606	0.609732	0.43549	0.391318	0.384155	0.456439	0.41091	0.410051		0.41048	0.953317
[K].DCGFPDEGEYVVTAGQDK.[S]	1xCarbamidomethyl [C2]	Ttn-203	14708	14725	248xx	29788916	42522304	28070748	29988012	23552918	22356878	28929832	32094328	38790352	28898478	26448714	39347972	32094328	0.308621	0.37086	0.315065	0.410942	0.51745	0.410041	0.39045	0.358348	0.421723	0.394631	0.423238	0.389961	0.394631	0.989407
[R].VTVETHTK.[V]		Ttn-203; A0A0A0MTS7	31699	31706	348xx	31357485	40465564	26782434	27256048	20352938	19389665	27019241	31993455	34028291	25056560	24170521	35451651	31993455	0.324872	0.352922	0.300605	0.373504	0.447148	0.35562	0.354271	0.357222	0.36995	0.342167	0.386782	0.351346	0.357222	0.991739
[K].VTNLQEGAIYYFR.[V]		Ttn-203; A0A0A0MTS7	28252	28264	326xx	30681176	43952344	20194384	25486460	26440084	22857198	25963272	31971188	34614152	27853466	27018306	31976530	31971188	0.317865	0.383332	0.226661	0.349255	0.580881	0.419217	0.366293	0.356973	0.37632	0.38036	0.432353	0.316906	0.37632	0.973358
[K].VGLGEAASVPGTVKPEDKLEAPELDLDSELRK.[G]		Ttn-203	25915	25946	326xx	34720696	34440441	34352959	26764316	1.9202e+07	1.79776e+07	3.05586e+07	3.19462e+07	35374297	2.69434e+07	21022542	35309302	3.19462e+07	0.359715	0.300374	0.385576	0.366766	0.421862	0.329721	0.363241	0.356695	0.384584	0.367933	0.336407	0.349935	0.356695	1.01835
[K].YDGGSSINNYIVEK.[R]		Ttn-203; A0A0A0MTS7	24181	24194	326xx	29726352	42497132	22979690	27445588	23721668	22405252	25583628	31908856	35297712	27539304	26583578	33843964	31908856	0.307973	0.370641	0.257923	0.376102	0.521158	0.410928	0.373371	0.356277	0.383751	0.37607	0.425396	0.335413	0.37607	0.992823
[R].LEDECEYACGVEDR.[K]	2xCarbamidomethyl [C5; C9]	Ttn-203	14800	14813	249xx	25327332	38959704	23079618	27004054	20602988	20291010	24203475	31879260	34568224	24781158	25201716	33882328	31879260	0.262398	0.339789	0.259045	0.370051	0.452641	0.372151	0.35492	0.355947	0.37582	0.338406	0.403283	0.335793	0.355947	0.997115
[R].VEAHVYGKPNPICK.[W]	1xCarbamidomethyl [C13]	Ttn-203	20832	20845	309xx	35233984	43085281	29346835	24056928	1.84304e+07	1.76e+07	2.67019e+07	31818503	35847304	27972044	23552520	35691721	31818503	0.365033	0.37577	0.329388	0.329665	0.40491	0.322797	0.347349	0.355269	0.389726	0.38198	0.376893	0.353725	0.376893	0.921613
[K].LVCEVSKPGAEVIWYK.[G]	1xCarbamidomethyl [C3]	Ttn-203; A0A0A0MTS7	14396	14411	245xx	2.98058e+07	49123785	1.85134e+07	2.59962e+07	1.96724e+07	19001041	2.28343e+07	3.17827e+07	37475732	25454653	24567554	3.19605e+07	3.17827e+07	0.308796	0.428435	0.207793	0.356239	0.432198	0.348492	0.352366	0.354869	0.40743	0.347603	0.393135	0.316746	0.354869	0.992946
[K].VEVQWLR.[N]		Ttn-203; A0A0A0MTS7	14854	14860	250xx	26755492	39113944	23637176	27363972	22173250	2.13738e+07	25196334	31557620	35061452	28255940	26594566	34017432	31557620	0.277194	0.341134	0.265303	0.374983	0.48714	0.392011	0.358059	0.352356	0.381183	0.385856	0.425572	0.337132	0.381183	0.939336
[R].IIVPLKDTK.[V]		Ttn-203	14556	14564	247xx	34187916	38468160	22348074	26969192	20780264	19270024	24658633	31428984	38175472	26610010	24193504	31926516	31428984	0.354196	0.335502	0.250834	0.369573	0.456536	0.353426	0.353811	0.350919	0.415038	0.36338	0.38715	0.31641	0.36338	0.973665
[R].SDTGTYIIEAVNVCGR.[A]	1xCarbamidomethyl [C14]	Ttn-203; A0A0A0MTS7	15670	15685	261xx	2.68408e+07	4.26883e+07	2.32837e+07	2.56054e+07	2.56185e+07	2.38965e+07	2.5612e+07	3.13833e+07	34295701	29771818	2.74109e+07	3.43702e+07	3.13833e+07	0.278078	0.372308	0.261335	0.350884	0.562832	0.438279	0.361596	0.350409	0.372857	0.406557	0.438635	0.340628	0.372857	0.969797
[K].APCSVSVLDTPGPPINFVFEDIRK.[D]	1xCarbamidomethyl [C3]	Ttn-203	16706	16729	273xx	35157204	43256396	23351552	25506810	19665436	18655770	24429181	31308036	37830324	26848350	23765106	32340662	31308036	0.364238	0.377263	0.262097	0.349534	0.432044	0.34216	0.356886	0.349569	0.411285	0.366635	0.380294	0.320515	0.366635	0.973409
[K].APCSVSVLDTPGPPINFVFEDIRK.[D]	1xCarbamidomethyl [C3]	Ttn-203	16706	16729	274xx	35157204	43256396	23351552	25506810	19665436	18655770	24429181	31308036	37830324	26848350	23765106	32340662	31308036	0.364238	0.377263	0.262097	0.349534	0.432044	0.34216	0.356886	0.349569	0.411285	0.366635	0.380294	0.320515	0.366635	0.973409
[R].DPCDPPGQPEVTNITR.[K]	1xCarbamidomethyl [C3]	Ttn-203; A0A0A0MTS7	27597	27612	326xx	31820820	39849416	32340840	28817030	23096888	22524660	30318925	31294930	35502716	25181118	26318026	34907812	31294930	0.329672	0.347548	0.362992	0.394895	0.507432	0.413118	0.378944	0.349423	0.38598	0.343867	0.421147	0.345956	0.349423	1.08449
[R].EVNSTHWSR.[V]		Ttn-203; A0A0A0MTS7	16856	16864	275xx	22209148	39871572	17635714	25850783	18492197	17064514	2.03507e+07	33135243	34104931	24118179	24499297	31272705	31272705	0.230092	0.347742	0.197943	0.354247	0.406268	0.312975	0.330358	0.369971	0.370783	0.329352	0.392043	0.30993	0.369971	0.892931
[K].SSCTIGWK.[K]	1xCarbamidomethyl [C3]	Ttn-203	21812	21819	319xx	28808224	36688156	27180174	27404266	21055570	20412000	27292220	31242430	35900576	27515590	25509828	35650708	31242430	0.298461	0.319977	0.305069	0.375535	0.462584	0.37437	0.347174	0.348836	0.390305	0.375746	0.408214	0.353319	0.375746	0.923958
[K].GTYTITASNR.[L]		Ttn-203	17387	17396	280xx	26164808	33945052	26167806	28065894	24804812	22892900	26166307	31169424	35201168	25459752	24816312	32145520	31169424	0.271074	0.296053	0.293706	0.384602	0.544954	0.419872	0.340328	0.348021	0.382702	0.347672	0.397116	0.318581	0.348021	0.977893
[K].GDKELDLCEK.[VI]	1xCarbamidomethyl [C8]	Ttn-203; A0A0A0MTS7	30998	31007	342xx	90999688	88769504	44570968	26229120	15086349	16728775	35400044	42455288	31167306	16319241	16181727	32836444	31167306	0.94278	0.774207	0.500263	0.359432	0.331442	0.306817	0.429847	0.474033	0.338846	0.222852	0.258944	0.325428	0.325428	1.32087
[K].SIHEQVSSISETTK.[S]		Ttn-203	34727	34740	358xx	43097128	39645676	36375123	27106193	20810955	24064000	31740658	36122003	33291659	23700566	22128251	31161182	31161182	0.446497	0.345771	0.408273	0.371451	0.45721	0.44135	0.424812	0.403319	0.361942	0.323649	0.354101	0.308825	0.354101	1.19969
[K].LSNVGGTK.[ST]		Ttn-203; A0A0A0MTS7	26697	26704	326xx	2.87548e+07	3.4534e+07	2.85739e+07	27180694	2.10855e+07	20457195	2.78773e+07	3.10971e+07	3.42181e+07	2.71725e+07	25119966	34776988	3.10971e+07	0.297907	0.30119	0.320712	0.372472	0.463242	0.375199	0.346592	0.347214	0.372014	0.371062	0.401975	0.34466	0.371062	0.934055
[R].EEGILSCIGK.[T]	1xCarbamidomethyl [C7]	Ttn-203	35069	35078	360xx	34179028	33475362	32431490	26181444	23289886	22643322	29306467	33710424	34023204	27671046	25825166	31041602	31041602	0.354103	0.291957	0.36401	0.358778	0.511672	0.415294	0.361394	0.376393	0.369895	0.377869	0.41326	0.30764	0.376393	0.960152
[R].VTGLYEGNTYEFR.[V]		Ttn-203; A0A0A0MTS7	19678	19690	304xx	36680656	43669356	35636128	36098452	24285588	22938506	35867290	30954266	46605268	25033678	24609120	35797008	30954266	0.380021	0.380864	0.399978	0.494677	0.533547	0.420708	0.410343	0.345619	0.506685	0.341854	0.393801	0.354769	0.354769	1.15665
[R].NAVGSVSNPSEVVGPITCIDSYGGPVIDLPLEYTEVVK.[Y]	1xCarbamidomethyl [C18]	Ttn-203	28760	28797	330xx	2.92671e+07	39923886	2.57899e+07	26976107	2.0493e+07	1.98081e+07	2.6383e+07	30838273	3.55338e+07	2.7032e+07	24373592	3.46241e+07	30838273	0.303214	0.348198	0.289465	0.369668	0.450226	0.363295	0.355746	0.344324	0.386318	0.369142	0.390032	0.343144	0.369142	0.963711
[R].NAVGSVSNPSEVVGPITCIDSYGGPVIDLPLEYTEVVK.[Y]	1xCarbamidomethyl [C18]	Ttn-203	28760	28797	331xx	2.92671e+07	39923886	2.57899e+07	26976107	2.0493e+07	1.98081e+07	2.6383e+07	30838273	3.55338e+07	2.7032e+07	24373592	3.46241e+07	30838273	0.303214	0.348198	0.289465	0.369668	0.450226	0.363295	0.355746	0.344324	0.386318	0.369142	0.390032	0.343144	0.369142	0.963711
[R].NAADSVSEPSESTGPITVK.[D]		Ttn-203	27677	27695	326xx	29111756	40002260	24831494	25211436	21791752	21024286	25021465	30791898	33278862	25763218	24104550	34106700	30791898	0.301605	0.348881	0.278708	0.345486	0.478758	0.3856	0.347184	0.343806	0.361802	0.351816	0.385726	0.338017	0.351816	0.986832
[K].NNLPISISSNISVSR.[S]		Ttn-203	35136	35150	360xx	34484256	26316374	38056252	28399704	20412688	27173938	27786821	30691926	31016064	24851714	25061086	32470506	30691926	0.357266	0.229519	0.427142	0.389176	0.448461	0.498389	0.408159	0.34269	0.337202	0.339369	0.401033	0.321801	0.339369	1.2027
[K].NNLPISISSNISVSR.[S]		Ttn-203	35136	35150	361xx	34484256	26316374	38056252	28399704	20412688	27173938	27786821	30691926	31016064	24851714	25061086	32470506	30691926	0.357266	0.229519	0.427142	0.389176	0.448461	0.498389	0.408159	0.34269	0.337202	0.339369	0.401033	0.321801	0.339369	1.2027
[K].YDGGSHVTNYIVLK.[R]		Ttn-203	28510	28523	328xx	36030337	59867264	1.22162e+07	34348562	2.75704e+07	2.50347e+07	3.09595e+07	35776075	43250566	30690302	2.63529e+07	2.76893e+07	30690302	0.373284	0.522135	0.137114	0.470697	0.605713	0.459154	0.464926	0.399457	0.470213	0.4191	0.421705	0.274417	0.4191	1.10934
[K].LELAAAPK.[I]		Ttn-203; A0A0A0MTS7	14908	14915	250xx	25193226	36819084	23130016	25078430	20371186	19413534	24104223	30641386	32314448	25296534	24182632	31943792	30641386	0.261008	0.321119	0.25961	0.343663	0.447549	0.356058	0.332391	0.342126	0.351318	0.345444	0.386976	0.316581	0.345444	0.962216
[K].LELAAAPK.[I]		Ttn-203; A0A0A0MTS7	14908	14915	251xx	25193226	36819084	23130016	25078430	20371186	19413534	24104223	30641386	32314448	25296534	24182632	31943792	30641386	0.261008	0.321119	0.25961	0.343663	0.447549	0.356058	0.332391	0.342126	0.351318	0.345444	0.386976	0.316581	0.345444	0.962216
[K].LPFNTYSVQAGEDLK.[I]		Ttn-203	26230	26244	326xx	37796312	47313968	23004222	29547096	20535826	20364308	26275659	32608288	38873800	24479426	24574434	30626764	30626764	0.391579	0.412651	0.258198	0.4049	0.451166	0.373495	0.39824	0.364087	0.42263	0.334285	0.393245	0.303529	0.364087	1.0938
[R].CNEHLVPVLTYTAK.[G]	1xCarbamidomethyl [C1]	Ttn-203	16543	16556	272xx	26468842	47824058	1.70126e+07	30565629	19361411	1.95038e+07	2.29863e+07	33566336	36133516	2.38862e+07	2.13798e+07	30615249	30615249	0.274224	0.4171	0.190949	0.418857	0.425364	0.357713	0.387406	0.374784	0.392838	0.326184	0.342124	0.303415	0.342124	1.13235
[K].SEWEEVTNTAVER.[R]		Ttn-203	17458	17470	281xx	NA	38077320	24567996	26447132	23164190	21521496	24567996	30308796	32969248	26346616	26389050	34215580	30308796		0.332093	0.27575	0.362419	0.50891	0.394719	0.362419	0.338412	0.358436	0.359783	0.422283	0.339096	0.358436	1.01111
[R].YVITATNSCGSK.[F]	1xCarbamidomethyl [C9]	Ttn-203; A0A0A0MTS7	17088	17099	277xx	30523864	35280484	27091560	25646266	20782152	19480694	26368913	30300910	33835016	25539676	25197628	35300444	30300910	0.316235	0.3077	0.304075	0.351445	0.456578	0.357289	0.33384	0.338324	0.367849	0.348764	0.403218	0.349848	0.349848	0.954243
[K].ESVTTDAGR.[Y]		Ttn-203	28452	28460	328xx	27128538	32959624	24958266	25581642	19813950	1.88365e+07	25269954	30285884	32406310	25598996	23407646	31288576	30285884	0.281059	0.287459	0.280131	0.350559	0.435306	0.345474	0.316466	0.338156	0.352316	0.349574	0.374574	0.310088	0.349574	0.905292
[R].ITGYVVDFLTEENK.[W]		Ttn-203	21829	21842	319xx	26786642	43292260	2.07886e+07	23733606	26790206	21889962	25260124	30284344	31640556	27356492	25791870	31803856	30284344	0.277516	0.377575	0.23333	0.325234	0.588573	0.401477	0.351405	0.338139	0.343991	0.373574	0.412727	0.315195	0.343991	1.02155
[K].TKPDSDWIVITSTLR.[N]		Ttn-203	16758	16772	274xx	28681728	44443933	2.11914e+07	23079798	25791868	21329850	24435833	31386517	3.0199e+07	28043182	2.48947e+07	33595227	3.0199e+07	0.29715	0.38762	0.237851	0.316275	0.566639	0.391204	0.351947	0.350445	0.328318	0.382951	0.39837	0.332948	0.350445	1.00429
[R].VYAENSAGLSSPSDPSK.[F]		Ttn-203; A0A0A0MTS7	29745	29761	335xx	31346132	37204424	29126392	26446570	20823490	19394334	27786481	30106076	34583484	25665170	24790500	34199180	30106076	0.324754	0.32448	0.326913	0.362412	0.457486	0.355706	0.341309	0.336149	0.375986	0.350478	0.396703	0.338934	0.350478	0.973841
[R].IIAQNDVGLSETSPASEPVVCK.[D]	1xCarbamidomethyl [C21]	Ttn-203; A0A0A0MTS7	32318	32339	353xx	28013513	39211760	26783558	26796711	2.28371e+07	20876007	2.67901e+07	30100629	34825715	25236081	2.57787e+07	44506514	30100629	0.290227	0.341987	0.300618	0.36721	0.501723	0.38288	0.354598	0.336088	0.37862	0.344618	0.412516	0.441085	0.37862	0.936556
[R].TDGGQYTLK.[L]		Ttn-203	26688	26696	326xx	27770060	34140308	26835126	26223210	19471590	19146570	26529168	30031994	32395760	26020192	24672760	33739816	30031994	0.287705	0.297756	0.301196	0.359351	0.427785	0.351161	0.326179	0.335321	0.352202	0.355326	0.394819	0.334381	0.352202	0.926114
[K].VNTEPCVK.[T]	1xCarbamidomethyl [C6]	Ttn-203	30217	30224	339xx	28641758	44440540	27678710	25357432	19433200	18573584	26518071	29922732	33264862	25219630	22784744	34692156	29922732	0.296736	0.38759	0.310665	0.347487	0.426941	0.340652	0.344069	0.334101	0.36165	0.344393	0.364606	0.343819	0.344393	0.99906
[K].WSACTQVK.[T]	1xCarbamidomethyl [C4]	Ttn-203	27256	27263	326xx	27662426	34497408	24925862	24321838	18339278	16817586	24623850	29785944	32204680	26295306	22963088	33759364	29785944	0.28659	0.300871	0.279767	0.333295	0.402908	0.308446	0.304658	0.332574	0.350124	0.359083	0.36746	0.334575	0.350124	0.870144
[K].EDLQKPVLDLK.[L]		Ttn-203; A0A0A0MTS7	20110	20120	304xx	33519048	4.16691e+07	2.85115e+07	26139500	21957424	20915010	2.73255e+07	29768612	89930112	23581280	25189302	36344900	29768612	0.347266	0.363419	0.320012	0.358204	0.482398	0.383596	0.360811	0.332381	0.977706	0.32202	0.403085	0.360199	0.360199	1.0017
[R].KPVSEVGDGR.[W]		Ttn-203; A0A0A0MTS7	30892	30901	341xx	30297442	35091827	28470563	24733752	19122849	17789093	2.66022e+07	29698392	33046746	23706724	22849490	33277650	29698392	0.313889	0.306055	0.319552	0.33894	0.420123	0.326264	0.322908	0.331597	0.359279	0.323733	0.365643	0.329801	0.331597	0.973799
[R].IPAEVTGRPVPTK.[V]		Ttn-203	17038	17050	277xx	32675533	32994761	36155842	22537844	1.56832e+07	1.56401e+07	2.76067e+07	2.96949e+07	35595506	2.3359e+07	21451051	35627637	2.96949e+07	0.338527	0.287765	0.405812	0.308848	0.344556	0.286851	0.323688	0.331558	0.386989	0.318985	0.343264	0.35309	0.343264	0.942968
[R].NLFSVPGAPDKPTVSSVTR.[N]		Ttn-203; A0A0A0MTS7	18226	18244	290xx	40616051	52026429	40075629	40799324	9.03932e+06	1.24102e+07	40345840	33888322	56977032	1.46685e+07	15518568	2.94545e+07	2.94545e+07	0.420793	0.453751	0.449807	0.559095	0.198591	0.227611	0.4353	0.378379	0.619445	0.20031	0.248332	0.291911	0.291911	1.49121
[R].NLFSVPGAPDKPTVSSVTR.[N]		Ttn-203; A0A0A0MTS7	18226	18244	291xx	40616051	52026429	40075629	40799324	9.03932e+06	1.24102e+07	40345840	33888322	56977032	1.46685e+07	15518568	2.94545e+07	2.94545e+07	0.420793	0.453751	0.449807	0.559095	0.198591	0.227611	0.4353	0.378379	0.619445	0.20031	0.248332	0.291911	0.291911	1.49121
[K].DYVVYDTR.[L]		Ttn-203; A0A0A0MTS7	31206	31213	344xx	32004632	35290960	15761864	30207484	22292940	23614284	26910884	29903036	34423612	26975234	25147432	29392610	29392610	0.331576	0.307792	0.176911	0.413949	0.489769	0.433102	0.372763	0.333881	0.374248	0.368367	0.402415	0.291298	0.368367	1.01193
[K].IDGYIISYR.[E]		Ttn-203	20744	20752	308xx	24607206	41429568	14761370	22014812	22290744	17919620	22152778	30007570	38072104	25465706	22362752	29050390	29050390	0.254937	0.36133	0.165681	0.301681	0.489721	0.328658	0.31517	0.335049	0.413914	0.347754	0.357854	0.287906	0.347754	0.906301
[K].FSPPSPPGKPVVTDITENAATVSWTLPK.[S]		Ttn-203; A0A0A0MTS7	19615	19642	304xx	40957888	48357360	36281820	27966070	19175670	17863092	32123945	29691214	41327512	20368558	17584208	29034370	29034370	0.424334	0.421751	0.407226	0.383234	0.421284	0.327621	0.414255	0.331516	0.449306	0.278148	0.281386	0.287747	0.287747	1.43965
[R].ETSTAVWSEVSATVAR.[T]		Ttn-203	28525	28540	328xx	32300966	48398528	2.2223e+07	24414129	2.37291e+07	22459794	2.40716e+07	28907567	3.06874e+07	3.01877e+07	26346335	28669724	28907567	0.334646	0.42211	0.24943	0.33456	0.521322	0.411928	0.373287	0.322767	0.333629	0.412236	0.4216	0.284133	0.333629	1.11887
[K].TGCEYQFR.[I]	1xCarbamidomethyl [C3]	Ttn-203; A0A0A0MTS7	24221	24228	326xx	26926216	34951532	24642818	25719242	19794626	19174366	25181030	28856024	31750400	25715404	23637076	32521986	28856024	0.278962	0.304831	0.27659	0.352445	0.434882	0.351671	0.328251	0.322191	0.345185	0.351164	0.378246	0.322312	0.345185	0.950942
[R].GRPIPNVSWSKPDTDLR.[T]		Ttn-203	28126	28142	326xx	27352104	30931543	12633036	9094991	17204546	1.81465e+07	1.76755e+07	28827493	34264558	27876166	22731357	35730699	28827493	0.283375	0.269771	0.141793	0.124634	0.377979	0.33282	0.276573	0.321873	0.372519	0.38067	0.363752	0.354112	0.363752	0.760333
[K].NDGGSPVTHYIVECLAWDPTGK.[K]	1xCarbamidomethyl [C14]	Ttn-203	17951	17972	288xx	28710717	44669850	1.51019e+07	2.24359e+07	21738836	18978108	2.20874e+07	29289180	30617185	2.53707e+07	21978416	28785641	28785641	0.29745	0.38959	0.169503	0.307451	0.477596	0.348072	0.327761	0.327028	0.332865	0.346456	0.351703	0.285282	0.332865	0.984667
[R].AYIDSTDSR.[T]		Ttn-203	28145	28153	326xx	24224030	29273092	25544356	23438756	17684572	17641098	23831393	28673396	29893228	24155266	22384304	29139118	28673396	0.250967	0.255307	0.286709	0.321194	0.388525	0.32355	0.303951	0.320152	0.324994	0.329859	0.358199	0.288785	0.324994	0.935251
[R].VSAVNHYGK.[G]		Ttn-203; A0A0A0MTS7	22460	22468	324xx	28385283	35878282	23957036	23065177	17687019	1.66264e+07	2.35111e+07	28637846	29163979	21948939	1.9725e+07	31405399	28637846	0.294079	0.312914	0.268893	0.316075	0.388578	0.304939	0.308926	0.319755	0.317066	0.29973	0.315643	0.311246	0.315643	0.978721
[R].LPGPPGKPK.[V]		Ttn-203; A0A0A0MTS7	17512	17520	282xx	31915676	36642792	29435828	23719690	17739252	17758468	26577759	28507660	33348206	25367060	22019776	32445276	28507660	0.330655	0.319582	0.330387	0.325044	0.389726	0.325703	0.328045	0.318301	0.362556	0.346407	0.352365	0.321551	0.346407	0.946993
[K].NAAGAISKPSDSTGPITAK.[D]		Ttn-203; A0A0A0MTS7	25513	25531	326xx	28865193	34536486	27665348	2.32514e+07	1.79773e+07	17252086	2.54584e+07	28505176	32196134	23178944	21716654	31919349	28505176	0.299051	0.301211	0.310515	0.318627	0.394956	0.316415	0.313465	0.318274	0.350031	0.316526	0.347515	0.316339	0.318274	0.984891
[K].LEAPDIDLDLELRK.[IV]		Ttn-203; A0A0A0MTS7	24851	24864	326xx	3.1897e+07	29505764	33412963	24794685	1.62891e+07	1.67998e+07	2.71502e+07	2.84154e+07	3.5771e+07	2.29284e+07	2.1448e+07	31451096	2.84154e+07	0.330461	0.257336	0.375026	0.339775	0.357867	0.30812	0.335118	0.317272	0.388897	0.313105	0.343215	0.311698	0.317272	1.05625
[K].DILIPPEGELDAELR.[K]		Ttn-203	21600	21614	316xx	25996666	43393764	20008060	25066272	22858650	21543066	23962461	28336536	31647172	25492866	25674396	32831584	28336536	0.269332	0.378461	0.22457	0.343497	0.502198	0.395115	0.360979	0.316391	0.344063	0.348125	0.410847	0.32538	0.344063	1.04916
[K].DILIPPEGELDAELR.[K]		Ttn-203	21600	21614	317xx	25996666	43393764	20008060	25066272	22858650	21543066	23962461	28336536	31647172	25492866	25674396	32831584	28336536	0.269332	0.378461	0.22457	0.343497	0.502198	0.395115	0.360979	0.316391	0.344063	0.348125	0.410847	0.32538	0.344063	1.04916
[R].VAAVNEK.[G]		Ttn-203; A0A0A0MTS7	27282	27288	326xx	25446342	28385888	29328754	25392600	18947528	19615480	25419471	28287280	34014272	25449230	25157986	32698720	28287280	0.263631	0.247569	0.329185	0.347968	0.416271	0.359761	0.338577	0.315841	0.369798	0.347529	0.402584	0.324063	0.347529	0.974241
[K].SITGYYLEK.[K]		Ttn-203	20340	20348	304xx	19150440	33321612	15122519	24668194	23585846	20401724	21993785	26214384	35481484	28633696	23189534	28221870	28221870	0.198403	0.290616	0.169735	0.338042	0.518174	0.374182	0.314329	0.292696	0.385749	0.391015	0.371084	0.279695	0.371084	0.847055
[K].SSYSESSAVVAEYPFSPPGPPGTPK.[V]		Ttn-203; A0A0A0MTS7	27484	27508	326xx	29523508	38178824	25801152	25674938	19911930	19371168	25738045	28099594	31755534	22127836	22858100	32978480	28099594	0.305871	0.332978	0.289591	0.351838	0.437459	0.355281	0.342408	0.313745	0.345241	0.302173	0.36578	0.326836	0.326836	1.04765
[K].VTGYHLEQK.[E]		Ttn-203	26450	26458	326xx	28134980	32857948	34901916	23545680	17113618	16837828	25840330	28063790	29946932	24400372	20182706	31265110	28063790	0.291486	0.286572	0.391738	0.322659	0.375981	0.308817	0.315738	0.313345	0.325578	0.333206	0.322968	0.309855	0.322968	0.977614
[K].GDSCEVTGTIK.[A]	1xCarbamidomethyl [C4]	Ttn-203; A0A0A0MTS7	30251	30261	339xx	28797680	35564032	28491278	22836696	19153916	18339524	25663987	27995650	30361624	24095970	22707240	29973336	27995650	0.298351	0.310173	0.319785	0.312944	0.420806	0.33636	0.316364	0.312585	0.330087	0.329049	0.363366	0.297053	0.329049	0.961451
[KR].WATCATVK.[V]	1xCarbamidomethyl [C4]	Ttn-203; A0A0A0MTS7	24009	24016	326xx	24758698	32545586	24107874	22986316	18072276	15752327	23547095	27722476	32717502	23573550	20654840	30634224	27722476	0.256506	0.283848	0.270586	0.314994	0.397042	0.288909	0.286378	0.309535	0.355699	0.321915	0.330523	0.303603	0.321915	0.889608
[K].AEGFINLQVIDVPGPVR.[N]		Ttn-203	14992	15008	251xx	2.57751e+07	39502611	1.8068e+07	1.94938e+07	2.26795e+07	2.09547e+07	21817068	2.74047e+07	2.74547e+07	25174365	2.40405e+07	2.98857e+07	2.74047e+07	0.267037	0.344524	0.202795	0.267135	0.498261	0.384323	0.305829	0.305986	0.298483	0.343775	0.384701	0.296184	0.305986	0.999487
[K].AEGFINLQVIDVPGPVR.[N]		Ttn-203	14992	15008	252xx	2.57751e+07	39502611	1.8068e+07	1.94938e+07	2.26795e+07	2.09547e+07	21817068	2.74047e+07	2.74547e+07	25174365	2.40405e+07	2.98857e+07	2.74047e+07	0.267037	0.344524	0.202795	0.267135	0.498261	0.384323	0.305829	0.305986	0.298483	0.343775	0.384701	0.296184	0.305986	0.999487
[KR].VENLTEGAIYYFR.[V]		Ttn-203; A0A0A0MTS7	26090	26102	326xx	25561890	35963524	20521448	21837030	21584624	19315850	21710827	27324958	28266040	24353954	23093250	27937794	27324958	0.264828	0.313657	0.230332	0.299245	0.474208	0.354266	0.306451	0.305096	0.307304	0.332572	0.369543	0.27688	0.307304	0.997225
[K].GEPVQSEPVK.[M]		Ttn-203; A0A0A0MTS7	22469	22478	324xx	30160658	35114260	26710708	21971400	17925214	16825762	24341054	27251338	31132600	23643384	20460010	30634216	27251338	0.312472	0.306251	0.2998	0.301086	0.393811	0.308596	0.307423	0.304274	0.338469	0.322869	0.327406	0.303603	0.322869	0.952163
[K].HIAIAWKPPEK.[N]		Ttn-203; A0A0A0MTS7	16214	16224	269xx	31158666	36677712	22745678	20410714	16314798	16176532	21578196	27358816	27249840	21955692	18135664	29417372	27249840	0.322812	0.319886	0.255297	0.279699	0.358431	0.296689	0.308288	0.305474	0.296256	0.299822	0.290211	0.291543	0.296256	1.04061
[R].GVYTVEAK.[N]		Ttn-203; A0A0A0MTS7	29941	29948	337xx	27352190	32473694	24463116	21537628	16917452	15903501	23000372	27244918	29458350	23821944	20874828	29109198	27244918	0.283376	0.283221	0.274573	0.295142	0.371671	0.291681	0.287528	0.304202	0.320266	0.325307	0.334044	0.288489	0.320266	0.897779
[K].FDDGTYR.[C]		Ttn-203	33548	33554	358xx	2.62138e+07	31157127	2.3624e+07	2.44812e+07	1.79191e+07	17441270	24052588	27215705	2.91144e+07	21987823	2.07071e+07	28776968	27215705	0.271581	0.271738	0.265154	0.335479	0.393678	0.319885	0.295812	0.303876	0.316527	0.300261	0.331359	0.285196	0.303876	0.973461
[K].LTCAVESSALCAK.[E]	2xCarbamidomethyl [C3; C11]	Ttn-203	34649	34661	358xx	30143680	30282926	27495904	21712832	18080782	18367406	24604368	28095316	26860870	21894930	20350356	28039232	26860870	0.312296	0.264114	0.308613	0.297543	0.397229	0.336871	0.310455	0.313697	0.292027	0.298992	0.325651	0.277885	0.298992	1.03834
[R].VFAENETGLSRPR.[R]		Ttn-203; A0A0A0MTS7	32419	32431	354xx	27864986	27560692	29423012	23402470	16650693	17974592	25481581	26828950	31774618	25142756	20246358	29713776	26828950	0.288688	0.240372	0.330243	0.320697	0.365811	0.329666	0.325182	0.299558	0.345449	0.343344	0.323987	0.294481	0.323987	1.00369
[K].YGISDECK.[S]	1xCarbamidomethyl [C7]	Ttn-203; A0A0A0MTS7	17493	17500	282xx	24573306	31490876	23423742	20403104	16766777	15887563	21913423	26757284	26825956	21410132	19803860	27121632	26757284	0.254586	0.274649	0.262907	0.279595	0.368361	0.291389	0.277122	0.298758	0.291648	0.292372	0.316906	0.268791	0.292372	0.947841
[K].DVAYPPGPPSNAHVTDTTK.[K]		Ttn-203	22582	22600	325xx	29235692	34632292	23163856	22952306	17962650	16417221	23058081	26662098	28816448	23003924	19764188	27101520	26662098	0.302889	0.302047	0.25999	0.314528	0.394634	0.301103	0.302468	0.297695	0.313288	0.314136	0.316271	0.268592	0.313288	0.965464
[K].DVAYPPGPPSNAHVTDTTK.[K]		Ttn-203	22582	22600	326xx	29235692	34632292	23163856	22952306	17962650	16417221	23058081	26662098	28816448	23003924	19764188	27101520	26662098	0.302889	0.302047	0.25999	0.314528	0.394634	0.301103	0.302468	0.297695	0.313288	0.314136	0.316271	0.268592	0.313288	0.965464
[K].NNEYTFR.[V]		Ttn-203	31121	31127	343xx	23063900	29149724	22687484	22795814	17250904	16382103	22741649	26630936	28901474	23062708	21073142	29226340	26630936	0.238948	0.254231	0.254643	0.312383	0.378997	0.300459	0.277551	0.297347	0.314212	0.314939	0.337217	0.28965	0.314212	0.883324
[R].FGISDHIDSVCVVVK.[L]	1xCarbamidomethyl [C11]	Ttn-203	28564	28578	328xx	2.53573e+07	35604008	20384730	23823165	20181219	20777667	22300416	2.66061e+07	26807910	2.37388e+07	22845429	27998638	2.66061e+07	0.262708	0.310522	0.228797	0.326462	0.443375	0.381077	0.318492	0.297069	0.291451	0.324172	0.365578	0.277483	0.297069	1.07211
[K].DTTGTALR.[I]		Ttn-203; A0A0A0MTS7	22636	22643	326xx	24742730	29315470	27390706	24021698	18430076	17608888	24382214	26577840	31875816	24689818	22333884	29976730	26577840	0.256341	0.255676	0.307432	0.329182	0.404903	0.322959	0.315196	0.296754	0.346549	0.337158	0.357392	0.297087	0.337158	0.934859
[R].YGQSFALESEPVVAQYPYK.[E]		Ttn-203	25317	25335	326xx	27057778	37023960	1.91704e+07	22123417	1.75939e+07	15815023	2.06469e+07	26539055	30731379	2.28574e+07	20183805	2.83004e+07	26539055	0.280326	0.322906	0.215168	0.303169	0.386533	0.290058	0.296614	0.296321	0.334107	0.312136	0.322986	0.280474	0.312136	0.950272
[K].CTLAWSLPQEDGGAEITHYIVER.[R]	1xCarbamidomethyl [C1]	Ttn-203; A0A0A0MTS7	31071	31093	343xx	30107510	44235388	16225603	25087858	18251646	17613640	21669752	30030522	30020388	22456480	18924846	26465338	26465338	0.311922	0.385801	0.182116	0.343792	0.400983	0.323046	0.333419	0.335305	0.326377	0.30666	0.30284	0.262287	0.30666	1.08726
[R].TANSIFLTWDPPK.[N]		Ttn-203; A0A0A0MTS7	15514	15526	259xx	20528172	29716682	16913286	21318640	28762430	22288064	21803352	26239528	26418078	26994154	23501368	26436310	26418078	0.212677	0.259175	0.189834	0.292141	0.631902	0.408779	0.275658	0.292977	0.287213	0.368626	0.376074	0.261999	0.292977	0.940887
[K].EVAPDFELDAELRR.[T]		Ttn-203	22685	22698	326xx	25900322	27372142	24805512	22097050	15688152	15903940	23451281	26354100	28666690	22653416	20063340	29274824	26354100	0.268334	0.238727	0.278416	0.302808	0.344664	0.291689	0.285053	0.294256	0.31166	0.30935	0.321058	0.29013	0.30935	0.921458
[K].AAADEWTTCTPPSGLQGK.[Q]	1xCarbamidomethyl [C9]	Ttn-203	26958	26975	326xx	26444468	34954836	25737598	21854128	19347594	17992222	23795863	26291290	30780586	22821436	22381964	32447624	26291290	0.273971	0.30486	0.288878	0.299479	0.425061	0.32999	0.302169	0.293555	0.334642	0.311644	0.358161	0.321575	0.321575	0.939656
[K].VVTLKPTVLEHTVISLNEGEQYLFR.[V]		Ttn-203	31598	31622	347xx	29278006	43540826	1.43424e+07	1.97803e+07	2.08838e+07	1.74974e+07	2.03321e+07	2.70712e+07	2.65133e+07	23893133	19356314	2.61202e+07	2.61202e+07	0.303328	0.379743	0.160979	0.27106	0.458811	0.320915	0.312121	0.302263	0.288248	0.326279	0.309744	0.258867	0.302263	1.03262
[R].SHQGVYSLLAK.[N]		Ttn-203; A0A0A0MTS7	18502	18512	294xx	60386322	32126280	19981822	50898106	43721800	41433549	4.25777e+07	25959256	25948274	51499694	46052436	25708782	25959256	0.625618	0.280191	0.224275	0.697484	0.960555	0.75992	0.661551	0.289847	0.282106	0.703268	0.736941	0.254789	0.289847	2.28241
[R].VAAVNAK.[G]		Ttn-203	31331	31337	345xx	28362201	29874699	28023145	2.15832e+07	1.60022e+07	1.57303e+07	2.48032e+07	25925357	32617562	2.0695e+07	20307401	30782601	25925357	0.29384	0.260553	0.314531	0.295766	0.351563	0.288505	0.294803	0.289469	0.354613	0.282606	0.324963	0.305073	0.305073	0.966334
[K].DKDATDLTR.[S]		Ttn-203; A0A0A0MTS7	20152	20160	304xx	25449636	32319692	24733390	22548088	17236442	17131668	23640739	25909874	29242162	20173562	20095540	29146762	25909874	0.263665	0.281878	0.277607	0.308989	0.378679	0.314207	0.295433	0.289296	0.317916	0.275485	0.321573	0.288861	0.289296	1.02121
[R].QLKPGDNFR.[L]		Ttn-203; A0A0A0MTS7	33311	33319	358xx	25080092	28414654	24095146	23272486	17782278	16882620	23683816	25801182	28802638	22919394	21486570	29196966	25801182	0.259836	0.24782	0.270443	0.318915	0.390671	0.309639	0.290041	0.288082	0.313138	0.312982	0.343833	0.289359	0.312982	0.926702
[R].VSAVNAAGEGPPGETEPVTVAEPQEPPTVELDVSVK.[G]		Ttn-203	16990	17025	276xx	24986256	31919520	22083634	20622258	17499382	17779802	21352946	25781884	29691494	21765368	19519066	28711110	25781884	0.258864	0.278387	0.247866	0.282598	0.384456	0.326094	0.280493	0.287867	0.322801	0.297223	0.312348	0.284544	0.297223	0.943712
[R].VSAVNAAGEGPPGETEPVTVAEPQEPPTVELDVSVK.[G]		Ttn-203	16990	17025	277xx	24986256	31919520	22083634	20622258	17499382	17779802	21352946	25781884	29691494	21765368	19519066	28711110	25781884	0.258864	0.278387	0.247866	0.282598	0.384456	0.326094	0.280493	0.287867	0.322801	0.297223	0.312348	0.284544	0.297223	0.943712
[R].NSVTLIWTEPK.[Y]		Ttn-203; A0A0A0MTS7	22202	22212	323xx	27305036	37535532	18345370	18498710	21522398	19433796	20478097	26151156	25763430	23528258	20108138	27131448	25763430	0.282887	0.327368	0.205908	0.253498	0.47284	0.356429	0.305127	0.29199	0.280096	0.321296	0.321775	0.268888	0.29199	1.04499
[K].GDEEIIETGR.[YF]		Ttn-203; A0A0A0MTS7	14412	14421	245xx	22078734	30524084	20070736	24395200	17715008	13555160	21074735	25737018	28342454	20962138	21102114	26000358	25737018	0.228741	0.266217	0.225273	0.334301	0.389193	0.248611	0.257414	0.287366	0.308135	0.286254	0.337681	0.257679	0.287366	0.895771
[R].NLCTLELFSVNR.[K]	1xCarbamidomethyl [C3]	Ttn-203; A0A0A0MTS7	21263	21274	313xx	29427904	47803724	11484346	28598212	27184664	22951006	27891438	30908666	33196274	25385216	23272308	25213626	25385216	0.304881	0.416922	0.1289	0.391897	0.597239	0.420937	0.404409	0.34511	0.360905	0.346655	0.372409	0.249882	0.346655	1.16661
[K].WVACGEPVPDTK.[M]	1xCarbamidomethyl [C4]	Ttn-203	15548	15559	259xx	18872244	31154256	16355572	20331612	22721480	17974474	19601928	24058788	26485588	25313718	22071000	26326134	25313718	0.195521	0.271713	0.183574	0.278615	0.499184	0.329664	0.275164	0.268628	0.287947	0.345678	0.353185	0.260907	0.287947	0.955606
[K].DSGDYTITAENSSGSK.[S]		Ttn-203; A0A0A0MTS7	21276	21291	313xx	23248306	28483908	22151848	23343092	18426212	17569990	22700077	25303200	29032690	22596574	22453738	30043420	25303200	0.240858	0.248424	0.248631	0.319883	0.404818	0.322246	0.284257	0.282522	0.315639	0.308574	0.35931	0.297748	0.308574	0.921198
[R].VSNLEEGK.[S]		Ttn-203	21761	21768	318xx	24181172	27494788	23275062	21549934	15475454	15144905	22412498	25191958	27013570	20661804	18949846	27105156	25191958	0.250523	0.239797	0.261238	0.29531	0.339991	0.277768	0.269503	0.28128	0.293687	0.282153	0.30324	0.268628	0.282153	0.955168
[K].ACEPVPAR.[D]	1xCarbamidomethyl [C2]	Ttn-203	27589	27596	326xx	22026732	31177344	20816876	21545208	17505632	16676444	21181042	25086448	28103490	20956560	20932362	27897914	25086448	0.228203	0.271915	0.233648	0.295246	0.384593	0.305858	0.28358	0.280102	0.305537	0.286178	0.334964	0.276484	0.286178	0.990922
[R].DPVAPPGPPFPK.[V]		Ttn-203	18331	18342	291xx	36775472	45980528	33890024	33263230	7452429	9946335	33576627	27998470	46947484	12716226	13299836	24984870	24984870	0.381003	0.401021	0.38038	0.455824	0.163728	0.182423	0.380692	0.312616	0.510406	0.17365	0.212827	0.247614	0.247614	1.53744
[R].DPVAPPGPPFPK.[V]		Ttn-203	18331	18342	292xx	36775472	45980528	33890024	33263230	7452429	9946335	33576627	27998470	46947484	12716226	13299836	24984870	24984870	0.381003	0.401021	0.38038	0.455824	0.163728	0.182423	0.380692	0.312616	0.510406	0.17365	0.212827	0.247614	0.247614	1.53744
[K].DENVIVPEEIK.[K]		Ttn-203; A0A0A0MTS7	16630	16640	273xx	27077582	31422824	33292074	23347460	20345730	20219242	25212521	24960608	26796924	22440364	21340112	27585968	24960608	0.280531	0.274056	0.373669	0.319943	0.446989	0.370835	0.345389	0.278697	0.291332	0.30644	0.341489	0.273393	0.291332	1.18555
[K].NTVHLSWKPPK.[N]		Ttn-203; A0A0A0MTS7	17940	17950	288xx	33031849	39155720	18110472	24435032	20997931	19112453	2.27165e+07	25554256	24931874	2.67998e+07	2.22668e+07	24585302	24931874	0.342218	0.341498	0.203271	0.334846	0.461318	0.350536	0.341858	0.285325	0.271055	0.365972	0.356318	0.243654	0.285325	1.19814
[K].TSGPDCNFR.[V]	1xCarbamidomethyl [C6]	Ttn-203	16150	16158	268xx	16356109	29108306	14143758	21416998	19051764	16611098	17831431	24910718	24959302	23550198	21891186	27852206	24910718	0.169453	0.253869	0.158749	0.293489	0.418561	0.304659	0.273679	0.27814	0.271354	0.321596	0.350308	0.276031	0.27814	0.983962
[K].VPCLECNYK.[V]	2xCarbamidomethyl [C3; C6]	Ttn-203; A0A0A0MTS7	30807	30815	340xx	23198374	34325596	18754162	21063590	16305636	14857481	19908876	24850736	26621220	21133616	20403642	28291450	24850736	0.240341	0.299372	0.210496	0.288646	0.35823	0.272496	0.280571	0.27747	0.289422	0.288596	0.326504	0.280385	0.288596	0.972194
[R].VNVASSK.[T]		Ttn-203	27355	27361	326xx	23172484	27953467	2.26712e+07	2.29338e+07	17141852	16321911	2.28025e+07	24715695	29155905	22351479	2.2163e+07	29078635	24715695	0.240073	0.243797	0.254461	0.314274	0.376601	0.299355	0.276908	0.275962	0.316978	0.305227	0.354658	0.288186	0.305227	0.907222
[K].VTEATITGLIQGEEYSFR.[V]		Ttn-203; A0A0A0MTS7	24017	24034	326xx	24991610	37246907	1.95706e+07	19965429	2.00475e+07	1.83979e+07	2.00065e+07	24603182	2.6364e+07	2.43462e+07	2.19567e+07	2.82918e+07	24603182	0.258919	0.32485	0.21966	0.273597	0.440438	0.33743	0.299224	0.274706	0.286626	0.332466	0.351356	0.280388	0.286626	1.04395
[K].ENEPLSTK.[T]		Ttn-203; A0A0A0MTS7	14950	14957	251xx	2.16905e+07	30829574	19640786	20831396	17430582	16222542	20236091	24587712	27479704	21992982	20949676	26698708	24587712	0.224719	0.268881	0.220447	0.285464	0.382945	0.297533	0.277173	0.274533	0.298755	0.300331	0.335241	0.2646	0.298755	0.927759
[K].CYLAWNPPLQDGGASISHYIIEK.[R]	1xCarbamidomethyl [C1]	Ttn-203	26733	26755	326xx	28024724	43290716	13782400	23793196	17489764	15967563	20641480	27423272	29049218	20780642	18321058	24560954	24560954	0.290343	0.377562	0.154693	0.326051	0.384245	0.292856	0.309454	0.306194	0.315818	0.283776	0.293178	0.243413	0.293178	1.05552
[K].DSEYQFR.[V]		Ttn-203	29638	29644	335xx	21406170	28121612	20395056	22045078	17485696	17100340	20900613	24555228	28485970	23110740	20818982	28225560	24555228	0.221773	0.245264	0.228913	0.302096	0.384155	0.313632	0.27368	0.274171	0.309695	0.315595	0.33315	0.279732	0.309695	0.883707
[R].ILIIQNAQLEDAGSYNCR.[L]	1xCarbamidomethyl [C17]	Ttn-203	14432	14449	245xx	23758161	31926778	22197791	20126868	16735434	16919974	2.11623e+07	25841569	2.44544e+07	20008650	19995809	26574626	2.44544e+07	0.246141	0.278451	0.249147	0.275809	0.367672	0.310324	0.27713	0.288533	0.265865	0.273233	0.319977	0.26337	0.273233	1.01426
[K].CTLAWKPPLQDGGSDITNYIVER.[R]	1xCarbamidomethyl [C1]	Ttn-203	24568	24590	326xx	31441328	47597704	13591776	29818798	21474320	20284444	25646559	29917936	33568892	24136258	20739566	24370042	24370042	0.32574	0.415125	0.152554	0.408623	0.471784	0.372031	0.390327	0.334048	0.364956	0.329599	0.331879	0.241521	0.331879	1.17611
[K].GWQTVDTTVK.[D]		Ttn-203; A0A0A0MTS7	16043	16052	266xx	26290992	32441774	24354522	21522746	11173321	11707273	22938634	24181840	29430880	16886680	16448082	26915114	24181840	0.272381	0.282942	0.273354	0.294938	0.245474	0.214719	0.272868	0.270002	0.319968	0.230601	0.263206	0.266744	0.266744	1.02296
[R].SDTGLYSITAVNNLGTASK.[E]		Ttn-203	18103	18121	289xx	24884682	29605666	25772900	21070688	16438718	16761795	22977685	24045784	28868386	20168876	20416526	28631806	24045784	0.257812	0.258207	0.289274	0.288743	0.361154	0.307423	0.289009	0.268483	0.313853	0.275421	0.32671	0.283758	0.283758	1.0185
[K].ITGYIVEYK.[E]		Ttn-203	18366	18374	292xx	23895006	30372910	18261476	18603822	19252658	17337896	18928240	24961074	26873420	22977586	22033356	23931252	23931252	0.247558	0.264899	0.204966	0.254938	0.422975	0.317989	0.259918	0.278702	0.292164	0.313777	0.352583	0.237172	0.292164	0.889633
[K].DEYEAPTIVLDPTIK.[D]		Ttn-203; A0A0A0MTS7	22285	22299	323xx	24998728	32460888	21956720	20590486	18906918	17996414	21273603	23910302	27933084	21977494	22257746	27855308	23910302	0.258993	0.283109	0.246441	0.282163	0.415379	0.330067	0.282636	0.26697	0.303684	0.30012	0.356173	0.276062	0.30012	0.941744
[K].DEYEAPTIVLDPTIK.[D]		Ttn-203; A0A0A0MTS7	22285	22299	324xx	24998728	32460888	21956720	20590486	18906918	17996414	21273603	23910302	27933084	21977494	22257746	27855308	23910302	0.258993	0.283109	0.246441	0.282163	0.415379	0.330067	0.282636	0.26697	0.303684	0.30012	0.356173	0.276062	0.30012	0.941744
[K].DAGFYVVCAK.[N]	1xCarbamidomethyl [C8]	Ttn-203; A0A0A0MTS7	33009	33018	358xx	20959654	28749058	21040356	19327900	15992856	14884247	20143777	23819592	26341198	22013730	20685136	27873834	23819592	0.217147	0.250736	0.236156	0.264861	0.351358	0.272987	0.257798	0.265957	0.286377	0.300614	0.331008	0.276246	0.286377	0.900205
[K].CLLNDEAEYSCEVR.[T]	2xCarbamidomethyl [C1; C11]	Ttn-203	14349	14362	244xx	19952156	31267770	16170755	21401224	15120977	14111551	1.80615e+07	23721812	24465978	18416190	17118964	24759940	23721812	0.206709	0.272703	0.1815	0.293273	0.332203	0.258816	0.265759	0.264865	0.26599	0.251487	0.273941	0.245385	0.264865	1.00338
[R].VSWRPPADDGGADILGYILER.[R]		Ttn-203; A0A0A0MTS7	32161	32181	352xx	25890960	38787724	14052730	21283076	18550952	15726866	19917014	25873028	26011302	23193560	19170886	23674206	23674206	0.268237	0.338289	0.157727	0.291653	0.407559	0.288442	0.290048	0.288885	0.282791	0.316726	0.306777	0.234625	0.288885	1.00403
[R].VTDVIEGTEVQFQVR.[A]		Ttn-203; A0A0A0MTS7	16159	16173	268xx	17446684	24112162	NA	11526693	14705995	19996558	17446684	23572710	16304445	24896070	14485392	27963482	23572710	0.180752	0.210295		0.157956	0.323086	0.366751	0.210295	0.2632	0.177259	0.339975	0.231798	0.277134	0.2632	0.798993
[K].IGYSDPSDVPDKHCPK.[D]	1xCarbamidomethyl [C14]	Ttn-203	21584	21599	316xx	23744995	27768048	19945546	1.77322e+07	14022023	12372213	1.88389e+07	23558773	23931402	18220179	1.60254e+07	23892502	23558773	0.246004	0.24218	0.223868	0.242995	0.30806	0.226915	0.242587	0.263045	0.260178	0.24881	0.256442	0.236788	0.256442	0.945974
[R].KGTWGVVSAGSSK.[L]		Ttn-203	19562	19574	304xx	1.91852e+07	28231223	19478706	1.78566e+07	14169296	1.34044e+07	1.85209e+07	23329645	29409738	20473446	17351733	27419242	23329645	0.198764	0.24622	0.218628	0.244699	0.311295	0.245846	0.245272	0.260486	0.319738	0.279581	0.277666	0.27174	0.277666	0.883336
[K].ANIAGATDVK.[W]		Ttn-203; A0A0A0MTS7	35026	35035	360xx	26712310	24658322	25481228	18811298	15623200	16147789	21734810	23310858	24404754	1.86818e+07	17578492	23266046	23266046	0.276746	0.215059	0.286	0.257781	0.343237	0.296162	0.281373	0.260277	0.265325	0.255115	0.281295	0.23058	0.260277	1.08105
[R].DTVVVQAGESFK.[I]		Ttn-203	24465	24476	326xx	22406846	29788508	17566390	21026534	18004084	16912448	19515309	23223026	26989056	19702240	20832056	25085504	23223026	0.232141	0.259802	0.197164	0.288138	0.395544	0.310186	0.27397	0.259296	0.293421	0.269049	0.333359	0.248612	0.269049	1.01829
[R].YSTYHVPTK.[E]		Ttn-203	34074	34082	358xx	27728911	37635629	18891775	21329657	1.78916e+07	1.60835e+07	20110716	25574640	2.44512e+07	1.96417e+07	1.7869e+07	2.31698e+07	2.31698e+07	0.287279	0.328241	0.212041	0.292292	0.393074	0.294983	0.293637	0.285553	0.265829	0.268222	0.285944	0.229626	0.268222	1.09475
[K].CENLGGESEWSEISEPVTPK.[S]	1xCarbamidomethyl [C1]	Ttn-203	32815	32834	357xx	22298100	29570934	18575416	18082922	13945819	13294047	18329169	23126964	22910250	16172369	15719360	23064102	22910250	0.231014	0.257904	0.20849	0.2478	0.306385	0.243822	0.245811	0.258223	0.249077	0.220846	0.251545	0.228579	0.249077	0.986889
[R].VCAENAAGPGK.[F]	1xCarbamidomethyl [C2]	Ttn-203; A0A0A0MTS7	16890	16900	275xx	14842079	29602656	12445356	20652886	14358641	12405680	14600360	22837116	25764728	18063262	19927590	23554866	22837116	0.153768	0.258181	0.139686	0.283018	0.315455	0.227529	0.242855	0.254987	0.28011	0.246668	0.318886	0.233442	0.254987	0.95242
[K].KPVYDLR.[V]		Ttn-203; A0A0A0MTS7	27949	27955	326xx	25122070	31679726	19702272	19426498	16200306	15514748	19564385	22737112	26507052	16645102	18429266	26854006	22737112	0.260271	0.276296	0.221138	0.266212	0.355916	0.284551	0.271254	0.253871	0.28818	0.227302	0.294909	0.266139	0.266139	1.01922
[R].VYAINAAGVGPASLPSDPVTAR.[D]		Ttn-203	18309	18330	291xx	27397476	38756598	26083368	30067540	7.41761e+06	9.8458e+06	26740422	25810751	41899424	1.20974e+07	1.1521e+07	22645884	22645884	0.283845	0.338017	0.292759	0.412032	0.162963	0.180579	0.288302	0.288189	0.455524	0.165199	0.184362	0.224434	0.224434	1.28457
[R].EVYDYYCR.[R]	1xCarbamidomethyl [C7]	Ttn-203; A0A0A0MTS7	33577	33584	358xx	17722558	26391208	16186434	19408104	15276068	13535399	16954496	22636386	24448390	20098590	18670840	25271090	22636386	0.18361	0.230172	0.181676	0.26596	0.335611	0.248249	0.23921	0.252746	0.265799	0.274462	0.298775	0.250451	0.265799	0.899967
[R].EEGGTYWSR.[V]		Ttn-203	17553	17561	282xx	20177246	26935060	18830762	19373424	14894414	14615231	19102093	22556546	24985828	19527316	18631268	24236242	22556546	0.209041	0.234915	0.211356	0.265484	0.327226	0.268053	0.2502	0.251854	0.271642	0.26666	0.298142	0.240195	0.26666	0.938271
[R].WEEPYHDGGSK.[I]		Ttn-203; A0A0A0MTS7	30775	30785	340xx	22691286	30769187	9765033	1.89603e+07	8461875	8598383	1.43627e+07	2.3479e+07	24309450	17311367	10352757	2.22875e+07	2.22875e+07	0.235088	0.268355	0.109602	0.259823	0.185905	0.1577	0.210496	0.262154	0.264288	0.2364	0.165667	0.220882	0.2364	0.890424
[R].VSAENEIGIGDPSPPSKPVFAR.[D]		Ttn-203	19000	19021	299xx	22611590	22680360	24809130	16962340	32375318	23132018	22906189	19809124	22841100	32181490	22188070	20935950	22188070	0.234262	0.197808	0.278457	0.232444	0.711276	0.424257	0.256359	0.221178	0.248325	0.439463	0.355058	0.207487	0.248325	1.03235
[K].EETSTSYAELR.[E]		Ttn-203	34083	34093	358xx	25531830	32867158	14561292	22939190	19724836	16905380	21332013	22413680	26823558	20713780	19074138	22158120	22158120	0.264516	0.286652	0.163435	0.314348	0.433349	0.310056	0.298354	0.250259	0.291621	0.282863	0.305229	0.2196	0.282863	1.05477
[K].VGLGEAASVPGTVKPEDKLEAPELDLDSELR.[K]		Ttn-203	25915	25945	326xx	17116332	15409245	NA	NA	NA	NA	1.62628e+07	NA	NA	NA	22135146	NA	22135146	0.17733	0.134392					0.155861				0.354211		0.354211	0.440022
[K].LEDAGEVQLTAK.[D]		Ttn-203; A0A0A0MTS7	14173	14184	241xx	18896448	25030840	19776750	16734679	13591776	17224702	18060575	22436612	22110286	21591628	18702076	25288068	22110286	0.195772	0.218308	0.221973	0.229324	0.298607	0.315913	0.225649	0.250515	0.24038	0.29485	0.299275	0.250619	0.250619	0.900365
[K].AVNEAGESEPSDTTGEIPATDIQEVPEVFIDIGAQDCLVCK.[A]	2xCarbamidomethyl [C37; C40]	Ttn-203	17697	17737	283xx	22327485	30628669	16139264	1.78103e+07	15925697	14057741	1.69748e+07	22033615	25768080	19396528	1.82893e+07	24422646	22033615	0.231318	0.267129	0.181146	0.244063	0.349883	0.257829	0.250946	0.246016	0.280146	0.264874	0.292669	0.242042	0.264874	0.947415
[K].AVNEAGESEPSDTTGEIPATDIQEVPEVFIDIGAQDCLVCK.[A]	2xCarbamidomethyl [C37; C40]	Ttn-203	17697	17737	284xx	22327485	30628669	16139264	1.78103e+07	15925697	14057741	1.69748e+07	22033615	25768080	19396528	1.82893e+07	24422646	22033615	0.231318	0.267129	0.181146	0.244063	0.349883	0.257829	0.250946	0.246016	0.280146	0.264874	0.292669	0.242042	0.264874	0.947415
[K].SWSTVTTECSK.[T]	1xCarbamidomethyl [C9]	Ttn-203; A0A0A0MTS7	21746	21756	318xx	20842372	26754254	23389704	19137914	14614831	14188677	19990143	22003116	24223832	18938810	17735254	26357684	22003116	0.215932	0.233338	0.262525	0.262257	0.321083	0.26023	0.261244	0.245675	0.263358	0.258624	0.283803	0.26122	0.26122	1.00009
[K].AESCYLTWDAPLDNGGSEITHYIIDK.[R]	1xCarbamidomethyl [C4]	Ttn-203	17425	17450	281xx	21029388	27726126	18199814	18067270	12743222	12967392	18133542	21945782	26907168	18140384	16543118	24917968	21945782	0.21787	0.241815	0.204274	0.247586	0.279965	0.237831	0.239823	0.245035	0.29253	0.247721	0.264727	0.246951	0.247721	0.968117
[RK].VKEQQEVVFNCEVNTEGAK.[A]	1xCarbamidomethyl [C11]	Ttn-203; A0A0A0MTS7	14565	14583	247xx	27500974	25693588	22862392	20183536	15366475	16155529	21522964	32766693	23885680	18851870	15971822	21920914	21920914	0.284917	0.224088	0.256607	0.276586	0.337597	0.296304	0.280751	0.365856	0.259681	0.257437	0.255585	0.217249	0.257437	1.09057
[R].KDSVLLVWEPPIIDGGAK.[V]		Ttn-203	26043	26060	326xx	22108236	31057616	15197652	16186084	18654200	15103001	17420142	23842584	21891552	21649834	16738841	23619364	21891552	0.229047	0.27087	0.170578	0.221807	0.409827	0.276999	0.249959	0.266214	0.238001	0.295645	0.267859	0.234081	0.266214	0.93894
[R].AAAHLTVIEK.[L]		Ttn-203; A0A0A0MTS7	14544	14553	246xx	22230460	30232998	17448932	17200342	14847536	13017654	17324637	21777656	22925500	15768947	16338374	23633168	21777656	0.230313	0.263678	0.195846	0.235706	0.326196	0.238753	0.237229	0.243158	0.249242	0.215337	0.26145	0.234218	0.243158	0.975618
[R].AAAHLTVIEK.[L]		Ttn-203; A0A0A0MTS7	14544	14553	247xx	22230460	30232998	17448932	17200342	14847536	13017654	17324637	21777656	22925500	15768947	16338374	23633168	21777656	0.230313	0.263678	0.195846	0.235706	0.326196	0.238753	0.237229	0.243158	0.249242	0.215337	0.26145	0.234218	0.243158	0.975618
[R].RSDTGLYSITAVNNLGTASK.[E]		Ttn-203	18102	18121	289xx	19027674	23219246	17398558	17046452	14164585	14460026	17222505	23107636	21767352	18324048	17062698	22342282	21767352	0.197132	0.202508	0.195281	0.233597	0.311192	0.265207	0.218052	0.258008	0.236651	0.250229	0.273041	0.221425	0.250229	0.871411
[K].DSVSLSWLKPEHDGGSR.[I]		Ttn-203	28303	28319	327xx	20638878	27658208	17680948	18963334	14932727	12815009	18322141	22716580	21708220	2.0261e+07	1.62124e+07	25083518	21708220	0.213824	0.241222	0.19845	0.259865	0.328067	0.235036	0.238129	0.253641	0.236008	0.276679	0.259435	0.248592	0.253641	0.938842
[R].NVYTLEIR.[N]		Ttn-203	35153	35160	361xx	23364512	27175228	17069314	16832402	17937768	17963776	17950772	24227336	20981282	21454686	19279964	22556180	21454686	0.242062	0.23701	0.191585	0.230663	0.394087	0.329468	0.239536	0.27051	0.228105	0.29298	0.308522	0.223545	0.27051	0.885499
[K].YILTIENGVGQPK.[S]		Ttn-203	29256	29268	335xx	22604494	23657066	24307228	17513920	14217555	14188842	20059207	21160334	26202066	19605318	17345904	25380010	21160334	0.234188	0.206326	0.272823	0.240003	0.312355	0.260233	0.250118	0.236265	0.284865	0.267726	0.277573	0.251531	0.267726	0.934232
[K].WEKPESDGGSK.[I]		Ttn-203; A0A0A0MTS7	27230	27240	326xx	23002813	27080064	20892882	1.81506e+07	13421805	1.32198e+07	1.95217e+07	21101835	25068977	1.80431e+07	16759371	24706358	21101835	0.238315	0.23618	0.234501	0.248727	0.294873	0.24246	0.240388	0.235612	0.272546	0.246392	0.268187	0.244854	0.246392	0.975631
[K].GSESTGPVTCR.[D]	1xCarbamidomethyl [C10]	Ttn-203; A0A0A0MTS7	30942	30952	341xx	20370118	27591494	16688288	17021912	13932107	12883737	16855100	20944354	22410022	17303990	16559029	23193180	20944354	0.21104	0.24064	0.187309	0.23326	0.306084	0.236297	0.234779	0.233854	0.243638	0.236299	0.264981	0.229858	0.236299	0.993565
[K].AGDTIR.[L]		Ttn-203; A0A0A0MTS7	20129	20134	304xx	24890362	20043094	25551758	20594322	13615719	15582654	20318708	20937208	21523624	17219718	16159148	21168772	20937208	0.257871	0.174807	0.286792	0.282215	0.299133	0.285797	0.284006	0.233774	0.234001	0.235148	0.258582	0.209795	0.234001	1.21369
[K].NSVVISWKPPADDGGSWITNYVVEK.[C]		Ttn-203	32652	32676	356xx	21093752	32322748	11108694	20480768	20200320	16624996	20340544	22481300	24053520	20521400	17491850	20485836	20521400	0.218537	0.281904	0.124684	0.280659	0.443795	0.304914	0.281282	0.251014	0.261506	0.280235	0.279908	0.203026	0.261506	1.07562	0.970344
[K].GDQELSSTAR.[L]		Ttn-203	24494	24503	326xx	20420852	27044222	17603734	16590916	14417629	1.3086e+07	17097325	20443372	22179238	17944376	15811279	23402912	20443372	0.211565	0.235867	0.197584	0.227354	0.316751	0.240007	0.231611	0.22826	0.241129	0.245044	0.253016	0.231936	0.241129	0.960526
[R].VKAENEVGIGEPSLPSRPVVAK.[D]		Ttn-203	20384	20405	304xx	1.97999e+07	27447717	18714136	16663283	1.65289e+07	1.35177e+07	1.76887e+07	20431277	24527413	1.8725e+07	1.43262e+07	20571390	20431277	0.205132	0.239386	0.210047	0.228346	0.363136	0.247924	0.233866	0.228125	0.266658	0.255705	0.229252	0.203874	0.229252	1.02013
[K].VLTVACAFTGEPTPEITWSCGGR.[K]	2xCarbamidomethyl [C6; C20]	Ttn-203	35311	35333	363xx	25391515	25973238	22107917	1.60086e+07	11982009	1.44533e+07	1.90582e+07	20328043	24185049	14299908	15635633	21722509	20328043	0.263063	0.226527	0.248138	0.219374	0.263241	0.265083	0.2556	0.226972	0.262936	0.195276	0.250205	0.215283	0.226972	1.12613
[R].AGISGKPEPTIEWYK.[D]		Ttn-203	28808	28822	331xx	17726704	25943980	13960309	19523380	16349209	15679033	1.7038e+07	19133136	22376684	20275048	19356314	22179926	20275048	0.183653	0.226272	0.15669	0.267539	0.359187	0.287564	0.246905	0.21363	0.243276	0.276871	0.309744	0.219816	0.243276	1.01492
[R].EAEGVYEAK.[E]		Ttn-203; A0A0A0MTS7	20800	20808	308xx	18061742	23479194	17302096	16590101	12700262	13048622	1.69461e+07	20207412	22071512	16976838	16106339	22489524	20207412	0.187124	0.204775	0.194198	0.227343	0.279021	0.239321	0.216059	0.225625	0.239958	0.231832	0.257737	0.222884	0.231832	0.931965
[K].NSECYVAR.[D]	1xCarbamidomethyl [C4]	Ttn-203; A0A0A0MTS7	25425	25432	326xx	18442208	21773628	15659280	17727122	13135121	13137394	16693201	20037026	21586742	17458678	15184534	20379894	20037026	0.191066	0.1899	0.175759	0.242924	0.288575	0.240949	0.216007	0.223723	0.234688	0.238412	0.242986	0.201976	0.234688	0.920404
[K].KYEIVADGR.[V]		Ttn-203; A0A0A0MTS7	14243	14251	242xx	18984884	25302530	15320257	17592970	14303351	12741193	1.64566e+07	19792886	21899050	15836186	17117478	21753668	19792886	0.196688	0.220677	0.171954	0.241086	0.31424	0.233682	0.22718	0.220997	0.238083	0.216255	0.273918	0.215591	0.220997	1.02798
[R].VTGLTEDHEYEFR.[V]		Ttn-203; A0A0A0MTS7	25794	25806	326xx	22164214	29012970	18386632	18757938	13008775	15039066	18572285	19757994	22445794	14487522	15877497	23486604	19757994	0.229627	0.253038	0.206371	0.25705	0.285799	0.275827	0.255044	0.220607	0.244027	0.197838	0.254075	0.232766	0.232766	1.09571
[K].DNGSPILGYWLEK.[R]		Ttn-203; A0A0A0MTS7	16842	16854	275xx	10291743	23359768	7.13352e+06	15997373	1.07136e+07	8747536	1.05027e+07	18931446	22977310	19590094	17647448	19703788	19590094	0.106625	0.203733	0.0800664	0.219221	0.235375	0.160436	0.182085	0.211379	0.249806	0.267518	0.282398	0.195276	0.249806	0.728905
[K].VGDEEWR.[R]		Ttn-203; A0A0A0MTS7	19068	19074	300xx	14643502	21986574	11256229	15708093	16752107	14953863	15330978	19586930	20441850	19332730	18102004	20676920	19586930	0.15171	0.191757	0.126339	0.215256	0.368039	0.274264	0.203507	0.218697	0.222241	0.264003	0.289672	0.20492	0.222241	0.915704
[R].VSAENENGEGTPSEIVVVAK.[D]		Ttn-203	21869	21888	319xx	21164372	23223734	20623598	16454712	12942832	13021223	18539155	19346460	23000244	17597174	16480006	22924426	19346460	0.219268	0.202547	0.231478	0.225488	0.28435	0.238818	0.228483	0.216012	0.250055	0.240303	0.263717	0.227194	0.240303	0.950813
[K].EPPVEFTKPLEDQTVEEEATAVLECEVSR.[E]	1xCarbamidomethyl [C25]	Ttn-203	14196	14224	242xx	16086624	2.55993e+07	13072222	1.45718e+07	1.27804e+07	1.51156e+07	1.48437e+07	1.94678e+07	1.92062e+07	1.89369e+07	1.55021e+07	2.24445e+07	1.92062e+07	0.166662	0.223266	0.146722	0.199685	0.280781	0.27723	0.211476	0.217367	0.208807	0.258599	0.248067	0.222438	0.222438	0.950715
[R].NAADSVSEPSESTGPITVKDDVEAPR.[I]		Ttn-203	27677	27702	326xx	19410864	17124514	25022586	19075988	10500822	12817738	18100251	22566056	19142592	13953144	14211283	22981208	19142592	0.201102	0.149352	0.280853	0.261409	0.2307	0.235086	0.232893	0.251961	0.208115	0.190541	0.227412	0.227757	0.227412	1.0241
[K].SSTVSVK.[V]		Ttn-203; A0A0A0MTS7	29269	29275	335xx	16516155	21097576	17076818	16138715	12325302	11473546	16327435	18937812	20446876	16237360	14858873	20769980	18937812	0.171112	0.184003	0.19167	0.221158	0.270783	0.210433	0.201051	0.21145	0.222295	0.221734	0.237775	0.205842	0.221734	0.906724
[K].DAVTLTWCEPDDDGGSPITGYWVER.[L]	1xCarbamidomethyl [C8]	Ttn-203; A0A0A0MTS7	15811	15835	263xx	15532788	28014186	1.19184e+07	1.55921e+07	1.39923e+07	1.21093e+07	1.47625e+07	18682977	20997575	18507367	1.5917e+07	20991519	18682977	0.160924	0.244327	0.133772	0.213667	0.307406	0.222093	0.21788	0.208604	0.228282	0.252732	0.254707	0.208038	0.228282	0.954432
[K].YSVTATNSAGTATENLSVIVLEKPGPPVGPVK.[F]		Ttn-203	26296	26327	326xx	20406454	24451620	15219158	16151486	15491001	13183508	1.58212e+07	18663932	19041202	18323032	15961354	22066088	18663932	0.211416	0.213256	0.170819	0.221333	0.340333	0.241795	0.217294	0.208392	0.207013	0.250215	0.255417	0.218688	0.218688	0.993628
[K].EGAEWQLVSSAISVTTCR.[I]	1xCarbamidomethyl [C17]	Ttn-203; A0A0A0MTS7	32681	32698	356xx	16088663	22935778	4977605	4814398	1.37043e+07	5.11552e+06	9.40993e+06	1.6885e+07	18628419	1.86519e+07	6474594	2.03122e+07	18628419	0.166683	0.200035	0.0558684	0.0659743	0.30108	0.0938221	0.130252	0.188529	0.202525	0.254706	0.103608	0.201305	0.201305	0.647039
[R].FECEISK.[E]	1xCarbamidomethyl [C3]	Ttn-203	14307	14313	243xx	14853809	25661560	12275930	15053609	13064368	11855941	1.39591e+07	18426250	19801138	16945916	14672625	19051960	18426250	0.153889	0.223808	0.137785	0.206288	0.28702	0.217446	0.211867	0.205738	0.215275	0.231409	0.234795	0.188816	0.215275	0.98417
[K].IDTSAESSK.[F]		Ttn-203	20166	20174	304xx	18259298	21116388	15506035	16121001	11754341	12105047	15813518	18339256	20182136	15624508	14672853	19326434	18339256	0.189171	0.184167	0.174039	0.220915	0.258239	0.222015	0.205043	0.204766	0.219417	0.213365	0.234798	0.191536	0.213365	0.960998
[R].IVVHAGGVIR.[I]		Ttn-203; A0A0A0MTS7	18448	18457	294xx	14743670	27114748	8.31248e+06	15088823	15362665	13729116	1.49162e+07	20531984	16102056	18218820	15799889	21289978	18218820	0.152748	0.236482	0.093299	0.20677	0.337513	0.251801	0.221626	0.229249	0.175059	0.248792	0.252833	0.210996	0.229249	0.966748
[K].ATDSDVWHK.[L]		Ttn-203	15738	15746	262xx	17025603	22954334	16864861	1.57819e+07	1.21879e+07	11683675	1.63234e+07	18218713	20959558	1.53741e+07	1.43265e+07	21619454	18218713	0.17639	0.200197	0.189291	0.216268	0.267764	0.214287	0.207242	0.203421	0.227869	0.209945	0.229255	0.214261	0.214261	0.96724
[K].AYSTVATNCHK.[T]	1xCarbamidomethyl [C9]	Ttn-203; A0A0A0MTS7	23911	23921	326xx	1.675e+07	21651046	15108244	1.40726e+07	12586139	10627003	1.45904e+07	1.80154e+07	19780463	15122372	1.33569e+07	19683253	1.80154e+07	0.173534	0.188831	0.169574	0.192844	0.276514	0.194907	0.190837	0.20115	0.21505	0.206508	0.213739	0.195072	0.206508	0.924117
[R].VSAVNIVGQGKPSFCTKPITCK.[D]	2xCarbamidomethyl [C15; C21]	Ttn-203; A0A0A0MTS7	18705	18726	296xx	1.47509e+07	18987125	1.26192e+07	1.45301e+07	1.56871e+07	13042491	1.46405e+07	1.79825e+07	2.139e+07	1.69753e+07	1.7357e+07	22711082	1.79825e+07	0.152823	0.165597	0.141637	0.199114	0.344641	0.239208	0.182356	0.200783	0.232548	0.23181	0.27775	0.22508	0.23181	0.786658
[R].FKDTITLK.[A]		Ttn-203	23381	23388	326xx	16027810	25964910	13297242	14931325	11690931	10966886	1.41143e+07	17969262	20284296	13152799	14004539	19698500	17969262	0.166052	0.226454	0.149248	0.204612	0.256846	0.20114	0.202876	0.200635	0.220528	0.179612	0.224104	0.195223	0.200635	1.01117
[K].GKPAPSVSWK.[K]		Ttn-203; A0A0A0MTS7	21922	21931	320xx	21264346	24818486	17555572	13802102	11931032	11113843	15678837	17877716	20747466	13938142	14938473	21624972	17877716	0.220304	0.216455	0.197043	0.189138	0.262121	0.203836	0.210146	0.199613	0.225563	0.190336	0.239049	0.214316	0.214316	0.980541
[R].LLWTVVSEDIQACR.[H]	1xCarbamidomethyl [C13]	Ttn-203	22431	22444	324xx	17572425	27429413	1.38245e+07	1.37632e+07	1.70996e+07	1.45091e+07	1.58043e+07	1.75649e+07	18127101	17857731	16414207	2.0858e+07	17857731	0.182055	0.239227	0.155165	0.188604	0.375673	0.266106	0.213915	0.196121	0.197075	0.243861	0.262664	0.206715	0.206715	1.03483
[K].ASAQEEISQK.[A]		Ttn-203	34932	34941	360xx	19568366	18489684	20556632	15574563	11442706	12358862	1.70321e+07	18490646	18667792	13649729	14483598	17806726	17806726	0.202733	0.161259	0.230727	0.213427	0.251393	0.22667	0.220048	0.206457	0.202953	0.186397	0.23177	0.176475	0.202953	1.08423
[R].AWTPVTYTVTR.[Q]		Ttn-203; A0A0A0MTS7	18576	18586	295xx	24313286	43295036	6461711	30537668	18564926	17247664	21439106	16957680	29951456	18088502	17398676	15260479	17398676	0.251892	0.3776	0.072526	0.418474	0.407866	0.316334	0.346967	0.18934	0.325627	0.247012	0.278417	0.15124	0.247012	1.40465
[K].YEIVADGR.[V]		Ttn-203; A0A0A0MTS7	14244	14251	242xx	15105704	20380996	24099372	14188588	10862217	10148522	14647146	17375882	18242996	13948395	14664503	23806612	17375882	0.156499	0.177754	0.27049	0.194434	0.23864	0.186131	0.190282	0.19401	0.198335	0.190476	0.234665	0.235937	0.198335	0.959399
[K].IDWFKDEADVLEDDR.[T]		Ttn-203	18764	18778	297xx	15448629	25503630	9332593	13394494	12418862	11099712	12906678	17265800	17651446	15565916	14495705	17458298	17265800	0.160052	0.222431	0.104749	0.183552	0.272839	0.203576	0.193564	0.192781	0.191904	0.212564	0.231963	0.173022	0.192781	1.00406
[K].NTAGAISAPSESTGTIICK.[D]	1xCarbamidomethyl [C18]	Ttn-203	22266	22284	323xx	15202101	22674638	13170303	14370857	12132215	11410502	13770580	17010234	18246480	13708225	14342472	19980544	17010234	0.157498	0.197758	0.147823	0.196932	0.266541	0.209276	0.197345	0.189927	0.198373	0.187196	0.229511	0.198019	0.198019	0.996596
[K].LGEAAQLSCQIVGRPLPDIK.[W]	1xCarbamidomethyl [C9]	Ttn-203; A0A0A0MTS7	32460	32479	355xx	17950012	14565777	21977938	13196730	10357627	10132895	1.38813e+07	16188816	21494192	16813816	13639235	22773962	16813816	0.185967	0.127036	0.24668	0.180842	0.227554	0.185844	0.185906	0.180756	0.233681	0.229606	0.218258	0.225703	0.225703	0.823673
[K].AYATITNNCTK.[TN]	1xCarbamidomethyl [C9]	Ttn-203; A0A0A0MTS7	27158	27168	326xx	16457666	19168510	15793126	14387107	11352546	11294269	1.50901e+07	16761911	19235042	15565464	13801750	18219698	16761911	0.170506	0.167179	0.177261	0.197154	0.249412	0.207145	0.187208	0.187155	0.20912	0.212558	0.220859	0.180568	0.20912	0.895216
[K].QATVEEDQR.[I]		Ttn-203	33895	33903	358xx	16166582	19343478	14985055	14213674	9565147	9525273	1.45994e+07	16680265	17793510	12512382	12212471	17879910	16680265	0.16749	0.168705	0.168192	0.194778	0.210143	0.1747	0.171703	0.186243	0.193448	0.170866	0.195427	0.1772	0.186243	0.921927
[K].IGYSDPSDVPDK.[H]		Ttn-203; A0A0A0MTS7	21584	21595	316xx	14976502	23831524	11252308	13489568	11009799	10607270	12370938	16653742	19140146	13918276	14164086	18408130	16653742	0.15516	0.207848	0.126295	0.184855	0.241882	0.194545	0.1897	0.185947	0.208089	0.190065	0.226657	0.182435	0.190065	0.99808
[R].AGISGKPEPTIEWYKDDK.[E]		Ttn-203	28808	28825	331xx	17246536	22063184	11406651	15460608	11992630	11912014	13726619	18202556	20706372	16572975	12777744	16533269	16572975	0.178679	0.192425	0.128028	0.211865	0.263474	0.218475	0.202145	0.20324	0.225116	0.226317	0.204472	0.163854	0.204472	0.988618
[K].KGEAEEEEPFSLPLTER.[L]		Ttn-203	16651	16667	273xx	15782660	19123468	14713289	14049458	11117402	11535760	1.43814e+07	16549513	18745546	14923982	13123965	17467244	16549513	0.163512	0.166786	0.165141	0.192527	0.244246	0.211574	0.179657	0.184783	0.203799	0.203798	0.210013	0.17311	0.203798	0.881541
[R].EASQTNWK.[M]		Ttn-203	29612	29619	335xx	15274679	19578358	13446778	13733234	11296527	10565196	13590006	16423705	18191784	14311771	13695766	17890210	16423705	0.15825	0.170753	0.150926	0.188194	0.248181	0.193773	0.179474	0.183378	0.197778	0.195438	0.219163	0.177302	0.195438	0.918314
[R].QGASKPSKPTEEIQAVDTQEAPEIFLDVK.[L]		Ttn-203	15581	15609	260xx	15667666	25253404	8380558	15297077	13665518	11415159	1.44813e+07	16395181	20106230	16765767	12596813	15303795	16395181	0.162321	0.220249	0.0940631	0.209624	0.300227	0.209362	0.209493	0.18306	0.218592	0.228949	0.201577	0.151669	0.201577	1.03927
[R].QGASKPSKPTEEIQAVDTQEAPEIFLDVK.[L]		Ttn-203	15581	15609	261xx	15667666	25253404	8380558	15297077	13665518	11415159	1.44813e+07	16395181	20106230	16765767	12596813	15303795	16395181	0.162321	0.220249	0.0940631	0.209624	0.300227	0.209362	0.209493	0.18306	0.218592	0.228949	0.201577	0.151669	0.201577	1.03927
[R].EGCEYEYR.[V]	1xCarbamidomethyl [C3]	Ttn-203; A0A0A0MTS7	27963	27970	326xx	14913594	18356922	14258657	14849902	11547099	11234545	1.45543e+07	16339700	17598684	14333571	13527025	18094544	16339700	0.154509	0.160101	0.160039	0.203496	0.253686	0.206049	0.181798	0.18244	0.19133	0.195736	0.216462	0.179327	0.19133	0.950182
[R].DTTVSSDSVAK.[F]		Ttn-203	34826	34836	358xx	17234292	17889188	16473115	13619760	10250551	10808700	1.50464e+07	16651904	16019408	13158819	11548105	16984296	16019408	0.178552	0.156021	0.184894	0.186639	0.225201	0.198239	0.185766	0.185926	0.17416	0.179694	0.184795	0.168324	0.179694	1.03379
[K].DTDQWCR.[V]	1xCarbamidomethyl [C6]	Ttn-203	31298	31304	345xx	13760001	16665734	13760037	14693132	10843182	10267468	13760019	15975915	17624584	14407396	12986988	17500008	15975915	0.142557	0.145351	0.154442	0.201348	0.238221	0.188312	0.171377	0.178379	0.191612	0.196744	0.207821	0.173435	0.191612	0.894399
[K].STVTLAWEKPLYDGGSR.[L]		Ttn-203; A0A0A0MTS7	31563	31579	347xx	16033350	22536348	13250526	12586998	11035476	10073359	12918762	15974338	17147472	11239494	13043444	18267900	15974338	0.16611	0.196552	0.148723	0.172486	0.242446	0.184752	0.178619	0.178361	0.186425	0.153484	0.208724	0.181045	0.181045	0.9866
[K].NGEEVAFDNR.[I]		Ttn-203	14683	14692	248xx	15445124	17683006	14198035	13688010	10582588	11501686	1.3943e+07	15973330	17112466	13168273	11781725	17265694	15973330	0.160015	0.154223	0.159358	0.187574	0.232496	0.210949	0.173795	0.17835	0.186044	0.179823	0.188534	0.171113	0.179823	0.966478
[K].KGIDLANR.[A]		Ttn-203	31397	31404	346xx	15420603	18823322	14776498	13018114	11658433	10319863	13897306	15953704	17187376	12548149	12562027	17866232	15953704	0.159761	0.164168	0.165851	0.178394	0.256132	0.189273	0.172123	0.178131	0.186858	0.171355	0.20102	0.177065	0.178131	0.966271
[R].CNFTDVSECQYTVTGLSPGDR.[Y]	2xCarbamidomethyl [C1; C9]	Ttn-203; A0A0A0MTS7	29817	29837	336xx	19827984	2.62924e+07	1.03379e+07	1.55501e+07	12273358	1.13373e+07	1.39117e+07	17494064	18146179	1.42713e+07	1.26387e+07	15840611	15840611	0.205423	0.229311	0.116032	0.213091	0.269642	0.207933	0.210512	0.195329	0.197282	0.194885	0.202248	0.15699	0.195329	1.07773
[K].ANFSNILENEFTVSGLTEDAAYEFR.[V]		Ttn-203; A0A0A0MTS7	23320	23344	326xx	1.5412e+07	24137774	10710306	1.36246e+07	12912143	11685684	1.32684e+07	1.53165e+07	1.73719e+07	15548012	1.45555e+07	17009900	15548012	0.159672	0.210519	0.120212	0.186705	0.283676	0.214324	0.198612	0.171016	0.188865	0.21232	0.23292	0.168578	0.188865	1.05161
[K].NFHGQCSATASLTVLPLVEEPPR.[E]	1xCarbamidomethyl [C6]	Ttn-203	35176	35198	361xx	20021082	20306890	13588210	13674917	11914818	11179300	1.36316e+07	17035992	15537443	13458915	10777213	15671015	15537443	0.207424	0.177107	0.152514	0.187395	0.261765	0.205036	0.196215	0.190215	0.168921	0.183792	0.172459	0.155309	0.172459	1.13775
[K].NFHGQCSATASLTVLPLVEEPPR.[E]	1xCarbamidomethyl [C6]	Ttn-203	35176	35198	362xx	20021082	20306890	13588210	13674917	11914818	11179300	1.36316e+07	17035992	15537443	13458915	10777213	15671015	15537443	0.207424	0.177107	0.152514	0.187395	0.261765	0.205036	0.196215	0.190215	0.168921	0.183792	0.172459	0.155309	0.172459	1.13775
[R].SFTSLVFSNGVER.[K]		Ttn-203	32995	33007	358xx	19972642	24630016	10959131	17185644	12509890	11914967	14847767	15970201	22472814	15161413	13252917	15462189	15462189	0.206922	0.214812	0.123005	0.235504	0.274838	0.218529	0.21667	0.178315	0.244321	0.207041	0.212076	0.153239	0.207041	1.04651
[R].LLANAECHEGQSVCFEIR.[V]	2xCarbamidomethyl [C7; C14]	Ttn-203	33713	33730	358xx	16606755	23251922	10863288	13807099	10158893	8872351	1.23352e+07	14249544	17461292	15235808	13446878	19868174	15235808	0.17205	0.202793	0.121929	0.189206	0.223188	0.162725	0.180628	0.159103	0.189836	0.208057	0.21518	0.196905	0.196905	0.917336
[K].APCSVSVLDTPGPPINFVFEDIR.[K]	1xCarbamidomethyl [C3]	Ttn-203	16706	16728	273xx	14241248	21414612	9160607	13764763	12593098	11423754	1.31789e+07	18110776	16981206	14485616	13099315	15209883	15209883	0.147543	0.186768	0.102818	0.188626	0.276667	0.20952	0.187697	0.202215	0.184617	0.197812	0.209618	0.150739	0.197812	0.948866
[K].APCSVSVLDTPGPPINFVFEDIR.[K]	1xCarbamidomethyl [C3]	Ttn-203	16706	16728	274xx	14241248	21414612	9160607	13764763	12593098	11423754	1.31789e+07	18110776	16981206	14485616	13099315	15209883	15209883	0.147543	0.186768	0.102818	0.188626	0.276667	0.20952	0.187697	0.202215	0.184617	0.197812	0.209618	0.150739	0.197812	0.948866
