# Supplementary figures and images for: The skeletal muscle circadian clock regulates titin splicing through RBM20
Source: eLife journal article supplement (doi:10.7554/elife.76478), 2022-09-01

Figure 5 - Source Data 1

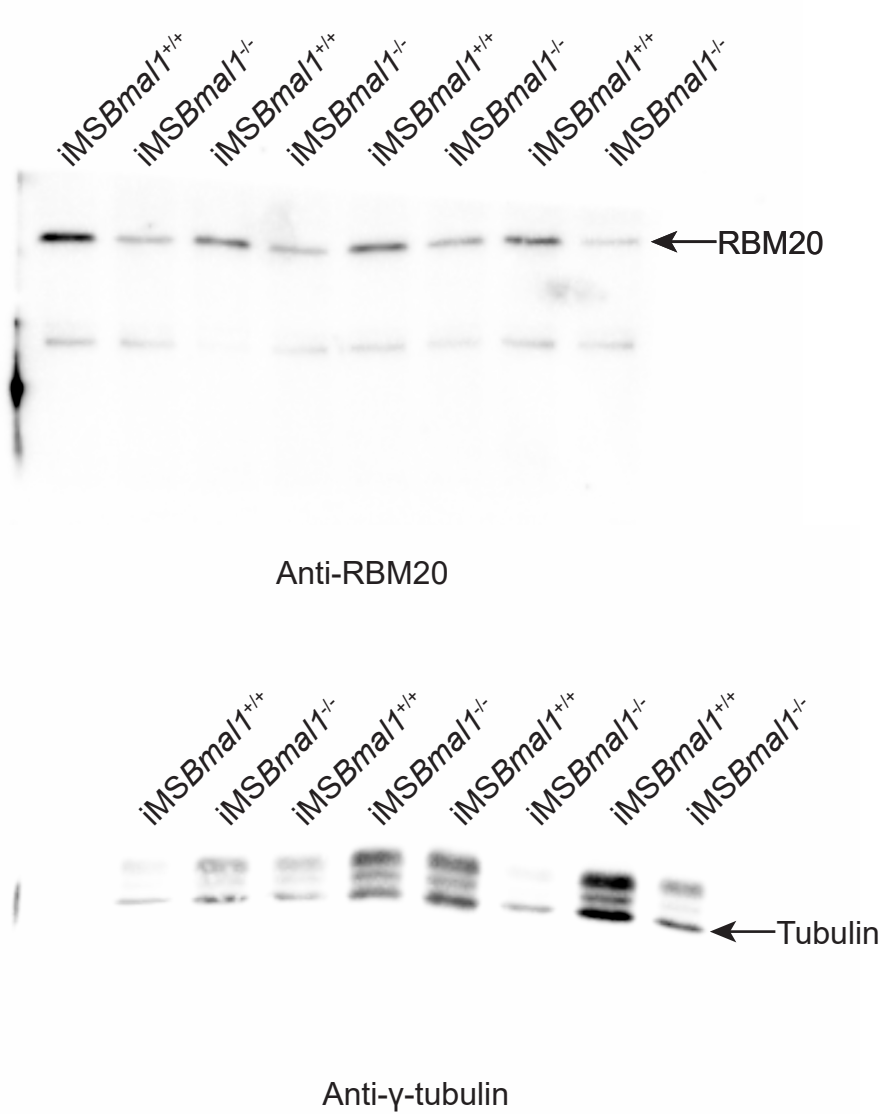

Supplement: supp [file elife-76478-supp-v1.zip]
